# Supplementary material for: Genome-Wide Identification of the Long Noncoding RNAs of Tribolium castaneum in Response to Terpinen-4-ol Fumigation
Source: MDPI journal article supplement (doi:10.3390/insects13030283), 2022-03-14
Supplement: s1 [file s1]

Table S4. status of overlap

| Overlap_Class                 | lncRNA_Num | mRNA_Num | Pair_Num |
|-------------------------------|------------|----------|----------|
| Lnc-Overlap-mRNA              | 90         | 104      | 110      |
| Lnc-AntiOverlap-mRNA          | 1070       | 1279     | 1444     |
| Lnc-CompleteIn-mRNAExon       | 5          | 6        | 6        |
| Lnc-AntiCompleteIn-mRNAExon   | 62         | 74       | 75       |
| mRNA-CompleteIn-LncExon       | 10         | 10       | 10       |
| mRNA-AntiCompleteIn-LncExon   | 79         | 88       | 89       |
| Lnc-CompleteIn-mRNAIntron     | 153        | 172      | 207      |
| Lnc-AntiCompleteIn-mRNAIntron | 143        | 150      | 187      |
| mRNA-CompleteIn-LncIntron     | 10         | 10       | 11       |
| mRNA-AntiCompleteIn-LncIntron | 35         | 44       | 50       |

Overlap\_Class: The category of the overlap; lncRNA\_Num: number of lncrnas that overlap with mRNA; mRNA\_Num:

Number of mRNA overlap with lncRNA; Pair\_Num: Lncrna-mrna logarithm of overlap exists.
