# Supplementary material for: Genome-Wide Identification of the Long Noncoding RNAs of Tribolium castaneum in Response to Terpinen-4-ol Fumigation
Source: MDPI journal article supplement (doi:10.3390/insects13030283), 2022-03-14
Supplement: s1 [file s1]

Table S2. Statistics of cis-regulation

| Start | Region      | TarPairNumber | mRNA Number | lncRNA Number | Flag |
|-------|-------------|---------------|-------------|---------------|------|
| 0     | overlap     | 2187          | 1846        | 1568          | Up   |
| 1     | 1-1000      | 342           | 333         | 296           | Up   |
| 1001  | 1001-2000   | 254           | 248         | 216           | Up   |
| 2001  | 2001-3000   | 240           | 239         | 216           | Up   |
| 3001  | 3001-4000   | 251           | 248         | 219           | Up   |
| 4001  | 4001-5000   | 274           | 273         | 240           | Up   |
| 5001  | 5001-6000   | 224           | 222         | 195           | Up   |
| 6001  | 6001-7000   | 251           | 247         | 224           | Up   |
| 7001  | 7001-8000   | 224           | 218         | 190           | Up   |
| 8001  | 8001-9000   | 255           | 250         | 230           | Up   |
| 9001  | 9001-10000  | 225           | 222         | 194           | Up   |
| 1     | 1-1000      | 377           | 359         | 297           | Down |
| 1001  | 1001-2000   | 318           | 314         | 273           | Down |
| 2001  | 2001-3000   | 328           | 322         | 264           | Down |
| 3001  | 3001-4000   | 294           | 283         | 243           | Down |
| 4001  | 4001-5000   | 275           | 270         | 223           | Down |
| 5001  | 5001-6000   | 269           | 263         | 222           | Down |
| 6001  | 6001-7000   | 267           | 264         | 229           | Down |
| 7001  | 7001-8000   | 258           | 252         | 211           | Down |
| 8001  | 8001-9000   | 253           | 247         | 209           | Down |
| 9001  | 9001-10000  | 243           | 240         | 210           | Down |
| 10001 | 10001-11000 | 218           | 211         | 187           | Down |
| 11001 | 11001-12000 | 223           | 220         | 200           | Down |
| 12001 | 12001-13000 | 240           | 234         | 197           | Down |
| 13001 | 13001-14000 | 211           | 207         | 181           | Down |
| 14001 | 14001-15000 | 235           | 235         | 191           | Down |
| 15001 | 15001-16000 | 242           | 237         | 213           | Down |

|       |             |     |     |     |      |
|-------|-------------|-----|-----|-----|------|
| 16001 | 16001-17000 | 208 | 206 | 171 | Down |
| 17001 | 17001-18000 | 226 | 223 | 191 | Down |
| 18001 | 18001-19000 | 204 | 202 | 166 | Down |
| 19001 | 19001-20000 | 193 | 192 | 165 | Down |
| 20001 | 20001-21000 | 1   | 1   | 1   | Down |

“Up” indicates lncRNA upstream of mRNA; “Down” indicates lncRNA downstream of mRNA.
