# Supplementary material for: Genome-Wide Identification of the Long Noncoding RNAs of Tribolium castaneum in Response to Terpinen-4-ol Fumigation
Source: Insects. 2022 Mar 14;13(3):283. doi: 10.3390/insects13030283 (PMC8951367; doi:10.3390/insects13030283)
Supplement: Supplementary file 1 [file insects-13-00283-s001.zip]

Archive with 5 entries (5 files):
- Figure S1 The flow chart of long non-coding RNA (lncRNA) analysis..tif
- Table S1 All the pre-miRNA prediction list..xls
- Table S2 All differential expression genes list.xlsx
- Table S3 Statistics of cis- and trans- regulation gene.pdf
- Table S4 mRNA and lncRNA overlap.pdf
