# Supplementary material for: Genome-Wide Identification of the Long Noncoding RNAs of Tribolium castaneum in Response to Terpinen-4-ol Fumigation
Source: Insects. 2022 Mar 14;13(3):283. doi: 10.3390/insects13030283 (PMC8951367; doi:10.3390/insects13030283)
Supplement: Supplementary file 1 [file insects-13-00283-s001.zip › Table S1 All the pre-miRNA prediction list..xls]

query_id	subject_id	identity	alignment_length	mismatches	gap_opens	query_start	query_end	subject_start	subject_end	evalue	bit_score	query_length	subject_length	ratio
tca-mir-8	LTCONS_00031208	100.00	73	0	0	1	73	1515	1587	2e-35	145	73	5050	1.000
tca-mir-8	LTCONS_00031207	100.00	73	0	0	1	73	809	881	2e-35	145	73	4344	1.000
tca-mir-10	LTCONS_00002883	100.00	71	0	0	1	71	933	1003	3e-34	141	71	1114	1.000
tca-mir-10	LTCONS_00002882	100.00	71	0	0	1	71	1420	1490	3e-34	141	71	1601	1.000
tca-mir-10	LTCONS_00002881	100.00	71	0	0	1	71	1226	1296	3e-34	141	71	1407	1.000
tca-mir-14	LTCONS_00006049	100.00	87	0	0	1	87	1022	1108	9e-44	172	87	2279	1.000
tca-mir-31	LTCONS_00021417	100.00	77	0	0	1	77	86	162	7e-38	153	77	3015	1.000
tca-mir-31	LTCONS_00021416	100.00	77	0	0	1	77	181	257	7e-38	153	77	1472	1.000
tca-mir-87a	LTCONS_00018704	100.00	82	0	0	1	82	1636	1717	8e-41	163	82	2491	1.000
tca-mir-276	LTCONS_00007094	100.00	71	0	0	1	71	977	907	3e-34	141	71	1912	1.000
tca-mir-276	LTCONS_00009821	100.00	71	0	0	1	71	4351	4421	3e-34	141	71	12622	1.000
tca-mir-281	LTCONS_00020625	100.00	67	0	0	1	67	1296	1362	6e-32	133	67	2129	1.000
tca-bantam	LTCONS_00007377	100.00	81	0	0	1	81	1377	1457	3e-40	161	81	3194	1.000
tca-mir-279b	LTCONS_00014549	100.00	92	0	0	1	92	793	884	1e-46	182	92	1964	1.000
lmi-mir-10	LTCONS_00002883	93.22	59	4	0	1	59	942	1000	1e-17	85.7	59	1114	0.915
lmi-mir-10	LTCONS_00002882	93.22	59	4	0	1	59	1429	1487	1e-17	85.7	59	1601	0.915
lmi-mir-10	LTCONS_00002881	93.22	59	4	0	1	59	1235	1293	1e-17	85.7	59	1407	0.915
api-mir-10	LTCONS_00002883	96.39	83	3	0	1	83	930	1012	3e-34	141	83	1114	0.964
api-mir-10	LTCONS_00002882	96.39	83	3	0	1	83	1417	1499	3e-34	141	83	1601	0.964
api-mir-10	LTCONS_00002881	96.39	83	3	0	1	83	1223	1305	3e-34	141	83	1407	0.964
tca-mir-2765	LTCONS_00033111	100.00	126	0	0	1	126	3721	3846	8e-67	250	126	4334	1.000
tca-mir-3807	LTCONS_00000755	100.00	99	0	0	1	99	6088	6186	7e-51	196	99	7801	1.000
tca-mir-3809	LTCONS_00000754	100.00	93	0	0	1	93	1217	1309	3e-47	184	93	2481	1.000
tca-mir-3810	LTCONS_00000755	100.00	102	0	0	1	102	4004	4105	1e-52	202	102	7801	1.000
tca-mir-3812	LTCONS_00000755	100.00	120	0	0	1	120	7316	7435	3e-63	238	120	7801	1.000
tca-mir-3813	LTCONS_00000755	100.00	93	0	0	1	93	127	219	3e-47	184	93	7801	1.000
tca-mir-3814	LTCONS_00000755	100.00	92	0	0	1	92	683	774	1e-46	182	92	7801	1.000
tca-mir-3815	LTCONS_00000755	100.00	95	0	0	1	95	6438	6532	2e-48	188	95	7801	1.000
tca-mir-3816	LTCONS_00000755	100.00	172	0	0	1	172	7446	7617	4e-94	341	172	7801	1.000
tca-mir-3818	LTCONS_00000754	100.00	93	0	0	1	93	1990	2082	3e-47	184	93	2481	1.000
tca-mir-3820	LTCONS_00000755	100.00	93	0	0	1	93	353	445	3e-47	184	93	7801	1.000
tca-mir-3821	LTCONS_00000754	100.00	92	0	0	1	92	1671	1762	1e-46	182	92	2481	1.000
tca-mir-3822	LTCONS_00000755	100.00	163	0	0	1	163	6855	7017	8e-89	323	163	7801	1.000
tca-mir-3825	LTCONS_00000754	100.00	95	0	0	1	95	1363	1457	2e-48	188	95	2481	1.000
tca-mir-3826	LTCONS_00000755	100.00	113	0	0	1	113	7662	7774	4e-59	224	113	7801	1.000
tca-mir-3827	LTCONS_00001740	98.61	72	1	0	1	72	131	202	2e-32	135	75	784	0.933
tca-mir-3829	LTCONS_00000755	100.00	90	0	0	1	90	5635	5724	2e-45	178	90	7801	1.000
tca-mir-3834	LTCONS_00003900	100.00	64	0	0	1	64	681	618	3e-30	127	64	1341	1.000
tca-mir-3834	LTCONS_00002127	100.00	64	0	0	1	64	3397	3460	3e-30	127	64	5114	1.000
tca-mir-2796	LTCONS_00003763	100.00	158	0	0	1	158	1104	947	8e-86	313	158	7097	1.000
tca-mir-3845	LTCONS_00007481	100.00	147	0	0	1	147	455	601	3e-79	291	147	7460	1.000
tca-mir-3846	LTCONS_00038047	97.71	131	3	0	1	131	576	706	1e-62	236	131	778	0.977
tca-mir-3846	LTCONS_00036116	97.71	131	3	0	1	131	193	323	1e-62	236	131	360	0.977
tca-mir-3846	LTCONS_00028757	97.71	131	3	0	1	131	132	262	1e-62	236	131	767	0.977
tca-mir-3846	LTCONS_00031101	97.66	128	3	0	1	128	1701	1574	7e-61	230	131	3646	0.954
tca-mir-3846	LTCONS_00036468	96.95	131	4	0	1	131	284	414	3e-60	228	131	967	0.969
tca-mir-3846	LTCONS_00026907	96.95	131	4	0	1	131	2729	2859	3e-60	228	131	3294	0.969
tca-mir-3853	LTCONS_00015184	100.00	115	0	0	1	115	287	173	3e-60	228	115	486	1.000
tca-mir-3856	LTCONS_00019935	100.00	83	0	0	1	83	2861	2943	2e-41	165	83	8858	1.000
tca-mir-375	LTCONS_00028435	100.00	74	0	0	1	74	756	829	4e-36	147	74	3881	1.000
tca-mir-3861	LTCONS_00025334	100.00	108	0	0	1	108	427	320	4e-56	214	108	2080	1.000
tca-mir-252a	LTCONS_00029248	100.00	87	0	0	1	87	2338	2424	9e-44	172	87	5781	1.000
tca-mir-252b	LTCONS_00031013	100.00	94	0	0	1	94	998	905	7e-48	186	94	1268	1.000
tca-mir-2944c	LTCONS_00030395	100.00	110	0	0	1	110	496	605	2e-57	218	110	2857	1.000
tca-mir-3864	LTCONS_00029473	100.00	79	0	0	1	79	153	75	5e-39	157	79	671	1.000
tca-mir-279e	LTCONS_00030395	100.00	95	0	0	1	95	266	360	2e-48	188	95	2857	1.000
tca-mir-1175	LTCONS_00012593	100.00	105	0	0	1	105	1052	1156	2e-54	208	105	1739	1.000
tca-mir-750	LTCONS_00012593	100.00	92	0	0	1	92	906	997	1e-46	182	92	1739	1.000
tca-mir-3872	LTCONS_00022563	100.00	93	0	0	1	93	2525	2617	3e-47	184	93	9703	1.000
tca-mir-3881	LTCONS_00035509	100.00	87	0	0	1	87	7095	7181	9e-44	172	87	11441	1.000
tca-mir-3881	LTCONS_00035508	100.00	87	0	0	1	87	6740	6826	9e-44	172	87	11086	1.000
tca-mir-3882	LTCONS_00037241	100.00	85	0	0	1	85	2044	2128	1e-42	168	85	5016	1.000
tca-mir-980	LTCONS_00035295	100.00	95	0	0	1	95	981	887	2e-48	188	95	1735	1.000
tca-mir-3884	LTCONS_00035453	100.00	66	0	0	1	66	1665	1730	2e-31	131	66	2474	1.000
tca-mir-3885	LTCONS_00032531	100.00	92	0	0	1	92	442	351	1e-46	182	92	1190	1.000
tca-mir-3894	LTCONS_00022198	100.00	87	0	0	1	87	107	193	9e-44	172	87	266	1.000
tca-mir-3895	LTCONS_00027411	100.00	90	0	0	1	90	19891	19802	2e-45	178	90	21396	1.000
tca-mir-3895	LTCONS_00027410	100.00	90	0	0	1	90	19776	19687	2e-45	178	90	21281	1.000
tca-mir-3895	LTCONS_00027409	100.00	90	0	0	1	90	19223	19134	2e-45	178	90	20728	1.000
tca-mir-3895	LTCONS_00027408	100.00	90	0	0	1	90	18377	18288	2e-45	178	90	19882	1.000
tca-mir-3900	LTCONS_00007842	100.00	71	0	0	1	71	1506	1436	3e-34	141	71	3143	1.000
tca-mir-6007	LTCONS_00000755	100.00	87	0	0	1	87	3616	3702	9e-44	172	87	7801	1.000
tca-mir-6008	LTCONS_00005215	100.00	96	0	0	1	96	1299	1204	4e-49	190	96	4189	1.000
tca-mir-9e	LTCONS_00030395	100.00	111	0	0	1	111	388	498	6e-58	220	111	2857	1.000
hme-mir-10	LTCONS_00002883	97.40	77	2	0	6	82	935	1011	5e-33	137	82	1114	0.902
hme-mir-10	LTCONS_00002882	97.40	77	2	0	6	82	1422	1498	5e-33	137	82	1601	0.902
hme-mir-10	LTCONS_00002881	97.40	77	2	0	6	82	1228	1304	5e-33	137	82	1407	0.902
tcf-mir-8	LTCONS_00031208	90.32	62	4	2	1	61	1523	1583	6e-10	60.0	61	5050	0.902
tcf-mir-8	LTCONS_00031207	90.32	62	4	2	1	61	817	877	6e-10	60.0	61	4344	0.902
tcf-mir-276	LTCONS_00007094	91.38	58	4	1	1	57	968	911	2e-12	67.9	57	1912	0.930
tcf-mir-276	LTCONS_00009821	91.38	58	4	1	1	57	4360	4417	2e-12	67.9	57	12622	0.930
sfr-mir-10	LTCONS_00002883	97.40	77	2	0	6	82	935	1011	5e-33	137	82	1114	0.902
sfr-mir-10	LTCONS_00002882	97.40	77	2	0	6	82	1422	1498	5e-33	137	82	1601	0.902
sfr-mir-10	LTCONS_00002881	97.40	77	2	0	6	82	1228	1304	5e-33	137	82	1407	0.902
tca-mir-11635	LTCONS_00000754	100.00	59	0	0	1	59	2117	2175	3e-27	117	59	2481	1.000
tca-mir-11636	LTCONS_00000755	100.00	57	0	0	1	57	5767	5823	4e-26	113	57	7801	1.000
tca-mir-276b	LTCONS_00007094	100.00	60	0	0	1	60	913	972	7e-28	119	60	1912	1.000
tca-mir-276b	LTCONS_00009821	100.00	60	0	0	1	60	4415	4356	7e-28	119	60	12622	1.000
tca-mir-11646	LTCONS_00037006	100.00	92	0	0	1	92	1437	1346	1e-46	182	92	18462	1.000
dqu-mir-10	LTCONS_00002883	95.95	74	3	0	1	74	934	1007	6e-29	123	74	1114	0.959
dqu-mir-10	LTCONS_00002882	95.95	74	3	0	1	74	1421	1494	6e-29	123	74	1601	0.959
dqu-mir-10	LTCONS_00002881	95.95	74	3	0	1	74	1227	1300	6e-29	123	74	1407	0.959
pca-bantam	LTCONS_00007377	97.18	71	2	0	1	71	1386	1456	2e-29	125	71	3194	0.958
