# Supplementary material for: Genome-Wide Identification of the Long Noncoding RNAs of Tribolium castaneum in Response to Terpinen-4-ol Fumigation
Source: Insects. 2022 Mar 14;13(3):283. doi: 10.3390/insects13030283 (PMC8951367; doi:10.3390/insects13030283)
Supplement: Supplementary file 1 [file insects-13-00283-s001.zip › Table S2 All differential expression genes list.xlsx]

## Sheet: lncRNA
GeneID	log2Ratio_Control-VS-Treated	Pvalue_Control-VS-Treated	FDR_Control-VS-Treated
LXLOC_011918	0.215224	0.119661	0.0317597
LXLOC_017684	-3.24981	0.0451574	0.0130041
LXLOC_004876	-0.832304	0.00287984	0.00101237
LXLOC_017404	-0.382448	0.136071	0.0357125
LXLOC_016027	-0.24981	0.79566	0.169153
LXLOC_005595	-0.365939	1.1374e-19	9.90839e-20
LXLOC_014033	0.35529	0.0956089	0.0258769
LXLOC_014940	-0.568033	0.0148632	0.00468203
LXLOC_020762	-0.261516	0.265302	0.0650821
LXLOC_017867	0.275412	8.20909e-05	3.45813e-05
LXLOC_010007	-0.430382	0.0241208	0.007309
LXLOC_010404	0.110938	0.565822	0.126782
LXLOC_007380	1.07212	0.376761	0.088779
LXLOC_009244	0.135544	0.526236	0.119017
LXLOC_018700	-0.927882	0.185183	0.047149
LXLOC_014052	-1.01534	0.00324005	0.0011316
LXLOC_018734	0.226253	1.37594e-31	1.6062e-31
LXLOC_005204	-1.79182	1.30956e-09	7.80642e-10
LXLOC_005670	0.0407542	0.848043	0.178797
LXLOC_010139	-0.125013	0.00780669	0.00257307
LXLOC_011416	0.165228	0.74988	0.160928
LXLOC_000867	0.137488	0.061352	0.0172517
LXLOC_010951	-0.724719	0.0475466	0.0136408
LXLOC_021094	0.433506	0.0336691	0.00996245
LXLOC_011077	0.0738898	2.10711e-06	1.02109e-06
LXLOC_019659	-0.460624	0.195048	0.0494063
LXLOC_003928	-0.598574	0.0210485	0.00646366
LXLOC_006599	-0.353187	0.270193	0.0661246
LXLOC_011611	-0.947781	0.000879313	0.000331586
LXLOC_005059	2.2014	1.01313e-05	4.62265e-06
LXLOC_004082	-2.24981	0.0196857	0.00607489
LXLOC_004045	-1.15918	0.000257291	0.00010293
LXLOC_009444	-0.0143559	0.952198	0.196279
LXLOC_010189	0.142508	0.751814	0.161168
LXLOC_021648	-0.438844	0.137141	0.0359644
LXLOC_018653	0.53155	0.0505979	0.0144527
LXLOC_011668	-1.80235	0.0342081	0.0100987
LXLOC_001430	-0.180269	0.187308	0.0476552
LXLOC_007867	-0.565148	4.08881e-14	2.97049e-14
LXLOC_021743	-1.05437	1.89277e-06	9.19318e-07
LXLOC_019404	0.34754	0.385544	0.0906307
LXLOC_013918	-2.24981	0.0991119	0.0267318
LXLOC_001391	-1.26668	4.96996e-06	2.32866e-06
LXLOC_010021	-4.60031	7.68648e-13	5.33633e-13
LXLOC_001380	-0.85126	0.00836117	0.00274179
LXLOC_005351	-1.92788	0.00751698	0.00248377
LXLOC_020417	-0.382072	0	0
LXLOC_006673	0.0465833	0.808208	0.171471
LXLOC_018968	-0.499882	6.84378e-11	4.3588e-11
LXLOC_021135	-1.61594	6.7079e-06	3.11229e-06
LXLOC_011300	-0.0825295	0.452382	0.104319
LXLOC_015976	0.737699	0.0288537	0.00863151
LXLOC_004450	-0.458396	0.070255	0.0195424
LXLOC_007619	-4.04558	0.00420439	0.0014452
LXLOC_001519	-0.496356	0.000367853	0.000144771
LXLOC_010180	-0.00876706	0.912915	0.190021
LXLOC_018640	-0.0897851	0.502523	0.114511
LXLOC_004199	-2.51284	0.00640207	0.00214315
LXLOC_013417	0.654942	4.9049e-14	3.55231e-14
LXLOC_019980	-1.13913	1.16015e-28	1.27553e-28
LXLOC_016860	0.902193	0.125514	0.0331855
LXLOC_014163	0.452801	4.55929e-17	3.6509e-17
LXLOC_012263	-0.391829	0.0521909	0.0148713
LXLOC_011233	-1.14511	1.16565e-05	5.3003e-06
LXLOC_008951	-0.245364	0.30557	0.0736992
LXLOC_002809	-0.605954	0.048106	0.0137856
LXLOC_005329	-1.51284	0.0168154	0.00525037
LXLOC_021147	0.116357	0.67473	0.147452
LXLOC_002667	-0.132499	0.490457	0.111986
LXLOC_006276	-1.92788	0.181381	0.0462917
LXLOC_001999	-0.593879	2.60589e-08	1.44061e-08
LXLOC_008040	0.451698	3.51192e-11	2.26562e-11
LXLOC_019901	1.14278	0.000396562	0.000155532
LXLOC_020201	-0.624489	0.0628767	0.0176399
LXLOC_006869	-0.200551	0.0564682	0.0159831
LXLOC_002032	0.765861	1.64773e-35	2.06953e-35
LXLOC_014718	-0.567757	4.65345e-55	7.77032e-55
LXLOC_019794	-0.587933	0.00524952	0.00177897
LXLOC_021390	-1.27327	7.51726e-10	4.5425e-10
LXLOC_002415	-0.0534125	0.900119	0.187933
LXLOC_010509	0.855743	5.956e-48	9.06142e-48
LXLOC_017998	0.0219326	0.908217	0.189228
LXLOC_003100	0.396766	0.0110213	0.00355015
LXLOC_010313	0.118437	0.147325	0.0384293
LXLOC_008474	-0.264391	0.0439561	0.012712
LXLOC_002650	-1.01195	2.40531e-15	1.82066e-15
LXLOC_004299	2.73163	2.33387e-23	2.26173e-23
LXLOC_020731	0.549987	0.000813287	0.000307921
LXLOC_006590	-0.344162	0.00201547	0.000723152
LXLOC_019204	-0.52492	0.0177671	0.00552849
LXLOC_007065	0.406122	6.09937e-06	2.83801e-06
LXLOC_019581	0.928421	0.158935	0.0411661
LXLOC_016969	-0.779359	0.00267213	0.000943347
LXLOC_004305	1.77994	5.54257e-06	2.58877e-06
LXLOC_019718	0.0836923	0.0255659	0.00771395
LXLOC_002425	-0.336346	0.189364	0.0480917
LXLOC_011505	-0.465104	2.12251e-10	1.31838e-10
LXLOC_019642	-0.496647	0.161372	0.0417354
LXLOC_002952	0.179034	0.747186	0.160485
LXLOC_010549	0.0934727	0.306243	0.073847
LXLOC_019350	0.160195	0.234237	0.058186
LXLOC_008152	0.581132	0.11262	0.0300244
LXLOC_018167	-0.608332	1.31157e-21	1.21362e-21
LXLOC_002678	0.816279	0.00398861	0.00137538
LXLOC_010918	-0.997303	7.11798e-07	3.56324e-07
LXLOC_002245	-1.19996	9.37325e-08	4.99455e-08
LXLOC_020776	-0.000363345	0.998691	0.20399
LXLOC_008181	-0.342919	0.531484	0.120032
LXLOC_012520	-1.73326	0.0398468	0.0116107
LXLOC_010722	-0.229636	7.9573e-07	3.96758e-07
LXLOC_011830	1.41607	0.00158199	0.000577695
LXLOC_020937	-0.184883	6.84838e-07	3.43285e-07
LXLOC_012879	-0.947247	0.000751101	0.000285038
LXLOC_020143	-1.35273	0.011849	0.00378983
LXLOC_018866	0.934615	1.20036e-07	6.35188e-08
LXLOC_016126	-0.143426	0.465824	0.10698
LXLOC_019967	-0.455611	0.0891401	0.0242737
LXLOC_020434	-0.324671	0.000603683	0.00023177
LXLOC_000948	-1.01534	0.22941	0.0570853
LXLOC_016228	1.07212	0.376761	0.088779
LXLOC_020331	-0.0253799	0.91746	0.1907
LXLOC_010585	0.557545	0.506194	0.115187
LXLOC_014181	-0.231943	0.665647	0.145669
LXLOC_005179	-0.383946	0.0720269	0.0199848
LXLOC_012497	-0.328075	7.68664e-16	5.92639e-16
LXLOC_012509	-0.962795	3.08256e-08	1.6957e-08
LXLOC_001788	-1.52243	0.00539128	0.00182499
LXLOC_018480	-1.30639	0.00163552	0.000595776
LXLOC_020347	-0.16965	0.458695	0.105546
LXLOC_012084	-0.698246	2.16411e-23	2.0993e-23
LXLOC_010211	-2.34292	0.00250238	0.000886743
LXLOC_012221	0.625717	0.00785211	0.00258751
LXLOC_004428	-0.7658	3.18306e-35	3.97546e-35
LXLOC_001593	-0.0190295	0.948751	0.195784
LXLOC_021011	-0.677744	1.716e-35	2.15362e-35
LXLOC_004071	0.137945	0.232096	0.0576951
LXLOC_006111	-0.24981	0.412828	0.0962357
LXLOC_017006	-4.68277	1.67094e-07	8.74936e-08
LXLOC_013895	0.563777	0.000110767	4.60044e-05
LXLOC_009137	-0.575219	1.05802e-19	9.23826e-20
LXLOC_018936	1.65188	0.00210581	0.000753525
LXLOC_013840	-1.35148	1.70021e-11	1.11417e-11
LXLOC_015344	0.876394	5.28992e-05	2.27181e-05
LXLOC_006233	-1.88018	2.95565e-18	2.46179e-18
LXLOC_006802	-0.62469	1.92044e-05	8.57314e-06
LXLOC_010965	-2.09781	0.00273948	0.000965732
LXLOC_008917	-0.222329	0.237671	0.0589582
LXLOC_015741	-0.99783	1.42499e-201	6.38878e-201
LXLOC_010710	-0.488927	4.95377e-08	2.68939e-08
LXLOC_009992	-0.238582	0.160967	0.0416373
LXLOC_011676	1.33515	0.0685195	0.0191037
LXLOC_008188	0.605186	2.59217e-14	1.89643e-14
LXLOC_008440	-1.15027	0.0878104	0.0239515
LXLOC_003490	-0.595306	0.00252484	0.000894184
LXLOC_018995	0.0116825	0.936923	0.193805
LXLOC_016929	-0.342919	0.376193	0.0886922
LXLOC_021412	-0.24981	0.65376	0.143504
LXLOC_012602	-0.241606	0.00208691	0.000747306
LXLOC_020837	0.579913	2.15405e-12	1.46858e-12
LXLOC_018781	-0.275805	0.500592	0.11413
LXLOC_013503	-0.413308	0.0563135	0.0159421
LXLOC_016606	-0.869779	0.00197272	0.000708604
LXLOC_003630	-1.45443	1.74677e-09	1.03471e-09
LXLOC_002153	-0.775879	0.324581	0.0778206
LXLOC_006207	0.391931	1.64089e-09	9.73762e-10
LXLOC_019981	-0.790378	0.135654	0.035625
LXLOC_010199	-0.68438	9.56164e-06	4.37376e-06
LXLOC_003637	0.977685	2.0143e-96	5.02378e-96
LXLOC_006468	-0.938451	6.19646e-06	2.88237e-06
LXLOC_005095	0.500212	0.0501674	0.0143406
LXLOC_009829	0.345137	0.384845	0.0904923
LXLOC_019020	0.17073	0.262972	0.0645738
LXLOC_016676	-0.247254	0.173278	0.0444717
LXLOC_007510	-0.221613	0.524488	0.118701
LXLOC_004060	-0.485797	1.27291e-06	6.26579e-07
LXLOC_012212	0.885705	0.00408151	0.00140523
LXLOC_005954	-0.252802	0.0258308	0.0077862
LXLOC_017148	-0.234489	0.00405243	0.00139611
LXLOC_003113	-1.23983	3.98428e-05	1.73021e-05
LXLOC_001401	-0.979643	1.49546e-17	1.21843e-17
LXLOC_017235	-0.512844	0.0284737	0.00852748
LXLOC_019727	0.438353	1.41762e-09	8.44028e-10
LXLOC_003699	0.487156	0.0416687	0.0121104
LXLOC_004225	0.479294	0.0872615	0.0238151
LXLOC_019207	0.910478	0.00214154	0.000765639
LXLOC_010281	0.322097	0.315886	0.0759108
LXLOC_016260	-0.785863	0.0737847	0.020439
LXLOC_004687	-0.472021	0.000127665	5.2696e-05
LXLOC_018133	0.739543	0.0933449	0.0253187
LXLOC_001888	-0.579958	0.00353019	0.00122646
LXLOC_004841	-1.00113	4.22067e-05	1.82881e-05
LXLOC_004113	-0.302277	0.411325	0.0959218
LXLOC_019346	0.418788	0.18482	0.0470786
LXLOC_014257	-0.521899	0.0799743	0.0219868
LXLOC_019623	-0.716378	1.47752e-06	7.23879e-07
LXLOC_004543	-0.423409	0.0773243	0.021341
LXLOC_007146	-0.195164	0.0290088	0.00867578
LXLOC_019636	-0.327015	4.09823e-15	3.07782e-15
LXLOC_019281	-0.646622	4.4646e-15	3.3504e-15
LXLOC_004900	-1.48976	1.15032e-05	5.23206e-06
LXLOC_015700	-0.290452	0.487192	0.111339
LXLOC_008505	-0.883027	0.000349606	0.0001379
LXLOC_009486	3.9436	4.46301e-36	5.66361e-36
LXLOC_007076	0.428774	0.0398846	0.0116211
LXLOC_014301	-1.45144	1.59721e-07	8.37495e-08
LXLOC_018671	0.0625323	0.915294	0.190373
LXLOC_004235	1.89809	2.11674e-09	1.24828e-09
LXLOC_016775	1.94659	0.0221914	0.00678017
LXLOC_010449	-0.981749	3.00839e-08	1.65657e-08
LXLOC_011290	-0.190916	0.826628	0.174863
LXLOC_005400	-1.34292	0.00356666	0.00123842
LXLOC_012527	-0.134254	0.0346627	0.0102206
LXLOC_012684	-0.0354843	0.591162	0.13155
LXLOC_021484	0.219964	0.192145	0.0487189
LXLOC_011362	-0.605954	0.0346098	0.0102069
LXLOC_004835	-0.583927	0.0654275	0.0183084
LXLOC_003605	-0.319052	0.0981092	0.0265067
LXLOC_018602	3.23239	0.00614554	0.00206362
LXLOC_019645	0.131576	0.229104	0.0570179
LXLOC_002859	2.87947	0.0216777	0.0066368
LXLOC_000261	-0.0347968	0.929397	0.192641
LXLOC_019212	-0.892487	0.00131884	0.00048672
LXLOC_019135	0.487156	0.656703	0.14395
LXLOC_017726	0.0963659	0.715575	0.15494
LXLOC_001826	-1.07233	0.000254169	0.000101747
LXLOC_014944	-0.17294	0.148124	0.0386173
LXLOC_019652	-0.540859	0.224109	0.0559425
LXLOC_010132	-0.523985	0.0618127	0.0173713
LXLOC_006080	3.65708	0.0183068	0.00568159
LXLOC_020794	0.095202	0.712171	0.15438
LXLOC_018898	-0.502613	0.00852587	0.00279169
LXLOC_000424	0.00373139	0.978806	0.200631
LXLOC_009534	0.0490347	0.849288	0.179015
LXLOC_019058	-0.255633	0.0712702	0.0198007
LXLOC_005727	-1.39501	0.000277195	0.000110552
LXLOC_018415	-2.04336	0.000400117	0.000156725
LXLOC_021069	-1.06141	6.12673e-51	9.68535e-51
LXLOC_013539	0.221865	0.371883	0.0878454
LXLOC_008209	0.526256	3.99938e-06	1.88963e-06
LXLOC_010648	-0.273017	0.0838958	0.0229695
LXLOC_002300	1.10454	1.43643e-07	7.55456e-08
LXLOC_012831	-0.139386	0.536639	0.120968
LXLOC_010167	-0.200613	0.175074	0.0448903
LXLOC_015041	-0.316653	0.000255458	0.000102238
LXLOC_019892	0.130673	0.27092	0.0662794
LXLOC_002019	1.81935	6.27172e-06	2.91544e-06
LXLOC_002841	-0.753631	3.61749e-08	1.98018e-08
LXLOC_021061	-0.0801862	0.289445	0.0702358
LXLOC_011082	-0.178205	0.208566	0.0524722
LXLOC_021177	1.07212	0.211301	0.0530484
LXLOC_018568	4.07212	0.00475739	0.0016223
LXLOC_008813	0.175212	0.520525	0.117977
LXLOC_013921	-1.24981	0.275939	0.0673356
LXLOC_019143	-0.195972	0.00404255	0.0013928
LXLOC_006182	-0.56347	6.41431e-05	2.73026e-05
LXLOC_002375	-1.62832	0.0320746	0.00952
LXLOC_013905	-0.26543	0.00222637	0.000794341
LXLOC_011409	-0.712112	4.25014e-80	9.19894e-80
LXLOC_019091	-0.129401	0.758646	0.162356
LXLOC_007018	-0.702219	1.21415e-56	2.06902e-56
LXLOC_017935	0.0296831	0.904497	0.188638
LXLOC_017360	1.17165	0.00931966	0.00303194
LXLOC_014289	0.251089	0.355331	0.0843179
LXLOC_003906	-1.87239	8.01504e-21	7.24929e-21
LXLOC_009636	-0.686874	0.166153	0.0428407
LXLOC_014857	0.0721184	0.874376	0.183537
LXLOC_002385	-0.24238	0.0620499	0.0174258
LXLOC_007165	-1.67995	1.15588e-06	5.70349e-07
LXLOC_011186	-0.0159867	0.929341	0.192641
LXLOC_021476	-0.267212	0.0548585	0.0155644
LXLOC_014481	0.504229	2.34843e-05	1.04031e-05
LXLOC_016902	-4.48247	7.81412e-12	5.19369e-12
LXLOC_007043	-2.73524	0.0291864	0.0087193
LXLOC_009036	-0.735237	0.151001	0.0392711
LXLOC_004616	0.279845	0.000213123	8.60339e-05
LXLOC_004140	-0.387313	0.313832	0.0754689
LXLOC_004864	0.046922	0.564122	0.126447
LXLOC_017269	-0.242668	0.0237423	0.00720411
LXLOC_007251	4.07212	0.00475739	0.0016223
LXLOC_000125	-1.03977	0.000579705	0.000223089
LXLOC_020917	-0.673478	0.515247	0.116948
LXLOC_017774	-0.645482	0.0162317	0.0050814
LXLOC_019454	-2.15027	0.00728791	0.00241394
LXLOC_005376	-0.311023	2.87151e-26	2.99116e-26
LXLOC_007879	-2.02742	8.77298e-08	4.68746e-08
LXLOC_003227	-0.00188222	0.99675	0.203695
LXLOC_003861	-0.387313	0.560893	0.125798
LXLOC_020855	-0.101494	0.0077257	0.00254792
LXLOC_014274	-3.3202	3.42225e-05	1.49463e-05
LXLOC_002647	-0.417881	0.000822761	0.000311315
LXLOC_015123	-1.68277	7.73813e-06	3.56999e-06
LXLOC_015108	-0.228199	0.129571	0.0341421
LXLOC_002431	-0.325846	6.05572e-07	3.04768e-07
LXLOC_000972	0.480897	2.3942e-25	2.44099e-25
LXLOC_007041	0.464436	0.329689	0.0788626
LXLOC_000292	0.0721184	0.615345	0.136195
LXLOC_017179	-3.24981	0.0451574	0.0130041
LXLOC_012353	1.0301	6.79249e-18	5.59943e-18
LXLOC_021261	-0.0514067	0.142531	0.0372742
LXLOC_001231	-0.413308	0.622155	0.137485
LXLOC_011218	-0.311797	0.0104016	0.00336337
LXLOC_009202	-0.545266	0.00526176	0.001783
LXLOC_020420	-1.45205	0	0
LXLOC_020094	-0.10355	0.160026	0.0414246
LXLOC_007121	-0.00524135	0.910108	0.189574
LXLOC_020304	0.0721184	0.843956	0.178044
LXLOC_001834	-0.61057	2.54549e-06	1.226e-06
LXLOC_010035	-0.998271	0.000194749	7.89877e-05
LXLOC_005522	-0.732084	7.79448e-21	7.05241e-21
LXLOC_011226	0.116906	0.3895	0.0914682
LXLOC_008218	0.547852	0.000968546	0.000363723
LXLOC_019126	0.202191	2.0123e-07	1.04696e-07
LXLOC_006222	1.56688	3.04342e-06	1.45495e-06
LXLOC_020809	2.08058	2.24478e-16	1.76067e-16
LXLOC_008728	-1.13433	0.013471	0.00426624
LXLOC_004129	0.914577	0.00520889	0.00176692
LXLOC_011829	0.250824	0.226351	0.0564189
LXLOC_017254	-0.215992	0.0287366	0.00860014
LXLOC_004945	0.705061	5.87505e-06	2.73858e-06
LXLOC_000645	-0.120527	0.717797	0.15538
LXLOC_019090	-0.295894	2.91505e-40	3.95884e-40
LXLOC_014202	-1.54086	3.8111e-05	1.65809e-05
LXLOC_004246	-0.275805	0.633876	0.139715
LXLOC_015628	0.0927462	0.0478597	0.013725
LXLOC_004432	-1.57697	4.89025e-22	4.56558e-22
LXLOC_013748	0.161386	0.270617	0.0662185
LXLOC_005225	-0.766131	0.0126055	0.00400692
LXLOC_002886	-1.01263	2.3367e-48	3.57393e-48
LXLOC_005552	-0.24104	0.310841	0.0748637
LXLOC_016336	1.48716	0.0224934	0.00686688
LXLOC_004264	0.00600975	0.920949	0.191246
LXLOC_011561	-0.16889	0.774651	0.165376
LXLOC_018096	0.216757	0.0166698	0.0052112
LXLOC_015794	-0.861454	6.89043e-07	3.45322e-07
LXLOC_005500	-3.51284	0.023433	0.00711866
LXLOC_016851	-1.77588	0.00733276	0.00242781
LXLOC_005024	-0.284575	0.0573827	0.016226
LXLOC_009986	-1.13939	0.00267057	0.000943
LXLOC_018674	-0.471937	5.11135e-12	3.42753e-12
LXLOC_011286	-2.17074	1.21029e-09	7.22256e-10
LXLOC_015155	0.264763	0.722556	0.156154
LXLOC_007780	3.87947	0.00929075	0.00302374
LXLOC_016981	0.657081	0.0180526	0.00561266
LXLOC_019586	0.495018	0.171301	0.0440244
LXLOC_017279	0.0263147	0.900214	0.187945
LXLOC_008321	-1.3202	0.0198092	0.00610993
LXLOC_013517	-0.948943	0.00120611	0.00044758
LXLOC_017416	-0.105567	0.184606	0.0470288
LXLOC_009607	-0.414143	0.000518256	0.000200498
LXLOC_006044	0.0587756	0.79528	0.169153
LXLOC_004439	-0.5917	0.00214091	0.000765525
LXLOC_003054	-1.73524	0.0199688	0.00615294
LXLOC_013288	-0.44053	0.0038457	0.00132919
LXLOC_017903	-0.351381	0.651158	0.143029
LXLOC_004145	1.75019	0.000284852	0.000113511
LXLOC_005981	-2.05074	3.4803e-43	4.94314e-43
LXLOC_005033	-0.492234	0.00988583	0.00320696
LXLOC_021181	-0.33054	3.84535e-46	5.68425e-46
LXLOC_006996	0.715975	0.116507	0.0309814
LXLOC_005476	-1.32842	3.31969e-05	1.45243e-05
LXLOC_015074	-1.83381	0.0123673	0.00393684
LXLOC_013032	-0.845133	6.50782e-17	5.18745e-17
LXLOC_010996	-0.147327	0.374732	0.0884116
LXLOC_006516	-2.24981	0.0991119	0.0267318
LXLOC_000650	-1.05708	1.02202e-09	6.12892e-10
LXLOC_005216	-0.936149	3.44047e-07	1.76137e-07
LXLOC_012727	0.122159	0.577594	0.129071
LXLOC_013163	0.0721184	0.943632	0.19489
LXLOC_011033	0.0721184	0.78246	0.166777
LXLOC_020374	0.500648	0.00156319	0.000571513
LXLOC_007038	0.0389515	0.899787	0.187904
LXLOC_018311	0.143774	0.502336	0.114474
LXLOC_020729	-0.145882	0.377856	0.089007
LXLOC_012416	0.163575	0.11133	0.0297244
LXLOC_017820	0.285339	0.00208424	0.000746513
LXLOC_005395	-2.16889	1.99784e-07	1.03955e-07
LXLOC_007011	-3.73524	0.012264	0.00390877
LXLOC_005039	-0.443694	3.30771e-10	2.03315e-10
LXLOC_001364	-0.67301	8.76569e-41	1.19809e-40
LXLOC_009324	1.24204	0.13586	0.0356686
LXLOC_021532	1.44564	1.79828e-72	3.65013e-72
LXLOC_020924	0.0146125	0.959232	0.197487
LXLOC_006450	0.460332	4.6087e-05	1.9899e-05
LXLOC_014195	4.07212	6.54215e-05	2.78129e-05
LXLOC_004792	-0.018422	0.931903	0.193014
LXLOC_021235	-1.34463	3.13251e-28	3.41261e-28
LXLOC_003381	-1.11231	0.000120117	4.96978e-05
LXLOC_016662	-0.109085	0.365458	0.086461
LXLOC_011773	-4.24981	0.00183801	0.000663076
LXLOC_003624	0.273752	0.0313294	0.00931519
LXLOC_006216	0.0721184	0.725021	0.156627
LXLOC_007181	-0.235759	0.00939202	0.00305446
LXLOC_017155	-1.42269	1.46704e-05	6.60935e-06
LXLOC_013647	0.101866	0.728029	0.157129
LXLOC_020565	0.126351	0.464626	0.106755
LXLOC_010740	-0.571738	0.0299345	0.00892321
LXLOC_009647	-2.04336	0.0123089	0.00391951
LXLOC_004364	-0.268919	0.44368	0.102578
LXLOC_021258	0.21227	0.305105	0.0736017
LXLOC_009646	1.87947	0.0747233	0.0206756
LXLOC_019311	-0.546705	0.00222146	0.000792784
LXLOC_001944	0.0789475	0.32592	0.0780844
LXLOC_013740	0.679801	0.0897554	0.0244262
LXLOC_017936	0.702885	0.000210074	8.48447e-05
LXLOC_005260	-1.51284	3.94733e-07	2.01077e-07
LXLOC_017695	-0.783492	0.00389084	0.00134375
LXLOC_019161	0.21303	0.000138988	5.71912e-05
LXLOC_017226	-0.61898	1.38774e-06	6.81188e-07
LXLOC_018080	0.979009	0.0246823	0.00746714
LXLOC_012967	-0.528567	1.05026e-18	8.86996e-19
LXLOC_008239	-0.133201	0.532759	0.12022
LXLOC_012549	0.586692	0.405475	0.0947606
LXLOC_019800	0.846011	0.227351	0.0566263
LXLOC_020285	0.0596152	0.621056	0.137322
LXLOC_005023	-0.46845	0.402924	0.0942455
LXLOC_019833	0.247698	0.027938	0.00838267
LXLOC_012943	-0.644089	0.0585596	0.0165282
LXLOC_010730	0.557545	0.00783485	0.002582
LXLOC_019061	0.881512	5.8329e-07	2.93977e-07
LXLOC_020633	-0.173839	0.704949	0.153004
LXLOC_006023	-0.936546	6.3107e-07	3.17242e-07
LXLOC_021034	-0.0393955	0.428154	0.0994109
LXLOC_021445	-0.298178	0.0654853	0.0183235
LXLOC_002959	0.131388	0.699079	0.151926
LXLOC_015496	-0.512844	0.265762	0.0651738
LXLOC_004270	0.102238	0.179153	0.0458281
LXLOC_008858	-0.379756	0.00791645	0.00260618
LXLOC_006545	-2.04094	1.29106e-22	1.22497e-22
LXLOC_017392	-1.23454	0.000938833	0.000353195
LXLOC_012824	-3.38731	0.00249456	0.000884358
LXLOC_007681	-0.790378	0.000257121	0.00010287
LXLOC_013311	-0.723523	0.0030388	0.00106473
LXLOC_013077	-0.870255	9.70841e-11	6.12906e-11
LXLOC_009405	-1.10949	1.92138e-05	8.57579e-06
LXLOC_001745	0.152118	0.253585	0.0624943
LXLOC_016988	0.23038	0.172706	0.0443343
LXLOC_015222	-0.836282	6.69971e-21	6.07421e-21
LXLOC_002729	1.69625	1.67382e-59	2.94563e-59
LXLOC_019323	-0.424286	0.107224	0.0287173
LXLOC_017835	-0.446349	0.00113074	0.000421145
LXLOC_008730	-1.44573	1.53083e-05	6.88533e-06
LXLOC_005986	-5.68277	9.30697e-08	4.96086e-08
LXLOC_009345	0.274935	0.150654	0.039214
LXLOC_007857	-0.723062	0.0176864	0.0055065
LXLOC_017538	-0.621295	2.84595e-21	2.60777e-21
LXLOC_013800	-2.19092	0.000378453	0.000148811
LXLOC_001372	-0.784517	0.00665511	0.00221875
LXLOC_012371	0.557545	0.506194	0.115187
LXLOC_020116	0.0896161	0.386652	0.0908517
LXLOC_003141	-0.512844	0.335157	0.0800623
LXLOC_009226	-0.293753	0.0326012	0.00966457
LXLOC_000820	-2.73524	0.0291864	0.0087193
LXLOC_009594	-1.19092	0.0215732	0.00661027
LXLOC_019176	0.0628742	0.642901	0.141501
LXLOC_021419	-0.396502	4.08548e-07	2.07919e-07
LXLOC_005409	0.602633	0.169436	0.0435861
LXLOC_005338	-2.24981	0.0196857	0.00607489
LXLOC_000773	0.335153	0.505423	0.11506
LXLOC_007468	0.104942	0.257999	0.0634895
LXLOC_002900	-1.37719	9.63669e-06	4.40767e-06
LXLOC_004089	-0.413308	0.0755992	0.0208979
LXLOC_009368	0.382612	0.000558584	0.000215385
LXLOC_013523	-2.06539	0.00104214	0.000389717
LXLOC_009023	-0.220291	0.0434447	0.012576
LXLOC_005736	-0.54937	0.126182	0.0333352
LXLOC_016280	0.220204	0.00701599	0.0023305
LXLOC_021212	-0.599996	0.00161983	0.000590457
LXLOC_005517	-3.51284	0.023433	0.00711866
LXLOC_004091	1.46245	4.2695e-08	2.32719e-08
LXLOC_001164	-0.742326	0.0240297	0.00728455
LXLOC_013653	-0.15395	0.406213	0.094906
LXLOC_020515	-0.131534	0.16282	0.0420678
LXLOC_016289	0.0721184	0.836681	0.176753
LXLOC_009947	-1.51284	0.1675	0.043138
LXLOC_006551	0.260563	0.221014	0.0552264
LXLOC_001907	-1.28336	3.49145e-06	1.65941e-06
LXLOC_020604	-4.09781	0.00343659	0.00119572
LXLOC_004385	-0.0675694	0.239783	0.0594159
LXLOC_019006	0.0566071	0.0408392	0.0118872
LXLOC_015948	0.833959	0.0252678	0.00762825
LXLOC_016231	-0.647774	0.0101992	0.00330207
LXLOC_008269	-0.695221	0.00761477	0.00251438
LXLOC_003991	-3.34292	6.4213e-19	5.46553e-19
LXLOC_007091	-0.244739	0.33862	0.0808107
LXLOC_014354	1.48716	0.0224934	0.00686688
LXLOC_017602	-1.3982	2.63103e-26	2.74475e-26
LXLOC_016369	-1.56531	1.18826e-07	6.28993e-08
LXLOC_005914	0.154581	0.751297	0.161135
LXLOC_019103	-0.33797	0.128567	0.0338975
LXLOC_000780	0.879473	0.321333	0.0771249
LXLOC_012211	-0.378988	0.0741755	0.0205356
LXLOC_018166	1.4062	2.91265e-05	1.28018e-05
LXLOC_020153	0.00289663	0.900042	0.187933
LXLOC_002205	1.42576	0.00802449	0.00263846
LXLOC_017054	0.570213	0.206712	0.0520698
LXLOC_011814	-0.562232	0.0117993	0.00377507
LXLOC_001057	0.636382	0.000198472	8.04176e-05
LXLOC_021286	-0.634946	0.000141477	5.81738e-05
LXLOC_016218	-0.384646	1.74271e-05	7.80035e-06
LXLOC_002778	-0.555913	0.0809075	0.0222235
LXLOC_000784	0.75019	0.355051	0.0842555
LXLOC_007864	-0.409869	0.0297596	0.00887485
LXLOC_018277	-0.342919	0.161752	0.041825
LXLOC_010564	-0.463935	0.114482	0.0304778
LXLOC_002012	-2.51284	0.0538691	0.0152978
LXLOC_014959	-1.4735	1.24682e-07	6.59062e-08
LXLOC_017887	0.00757439	0.985245	0.201774
LXLOC_011046	0.142508	0.654699	0.143626
LXLOC_010598	0.588517	0.0050437	0.00171421
LXLOC_011877	-0.496165	0.148361	0.0386708
LXLOC_020310	-0.228041	0.32184	0.0772278
LXLOC_013114	-1.61976	0.000123942	5.12026e-05
LXLOC_007951	-0.831452	2.8384e-07	1.4617e-07
LXLOC_018051	0.0721184	0.951174	0.196109
LXLOC_003702	-0.377685	0.199985	0.0505392
LXLOC_016569	-0.701606	3.80387e-13	2.67459e-13
LXLOC_015055	-0.582746	0.0282523	0.00847074
LXLOC_004298	0.589943	0.0482042	0.0138117
LXLOC_015793	0.187844	5.25052e-08	2.84733e-08
LXLOC_013652	-1.6012	1.5501e-24	1.54847e-24
LXLOC_001875	-0.409415	0.11223	0.0299385
LXLOC_012788	-0.434842	0.0233035	0.00709295
LXLOC_005200	-0.664847	0.199568	0.0504417
LXLOC_001963	1.15958	0.0522373	0.0148828
LXLOC_007979	-0.853881	0.00710914	0.00235984
LXLOC_014451	-0.512844	0.0373425	0.0109351
LXLOC_005505	0.422608	0.00583509	0.00196842
LXLOC_007717	0.264763	0.722556	0.156154
LXLOC_015101	0.352908	5.05448e-05	2.17451e-05
LXLOC_002585	-0.981644	1.25374e-17	1.02524e-17
LXLOC_019605	-0.393545	0.337883	0.0806544
LXLOC_017943	-0.114714	0.244746	0.0604987
LXLOC_018847	1.07212	0.211301	0.0530484
LXLOC_019774	-0.288194	0.193945	0.0491321
LXLOC_003265	-0.248314	0.0738386	0.0204516
LXLOC_019705	0.185895	0.00152162	0.000557149
LXLOC_001395	-0.908429	2.32853e-08	1.29107e-08
LXLOC_014150	-1.42839	3.34395e-05	1.46226e-05
LXLOC_004561	1.24496	2.11521e-152	7.5096e-152
LXLOC_005744	-0.681721	0.00653644	0.00218261
LXLOC_021716	-0.088184	0.116251	0.0309202
LXLOC_002932	-1.36398	0.000406535	0.000159125
LXLOC_012167	-0.0534125	0.900119	0.187933
LXLOC_004529	-0.166041	0.0789346	0.0217603
LXLOC_016323	-0.667914	0.000307688	0.000122193
LXLOC_010993	-1.09354	6.04215e-23	5.7844e-23
LXLOC_014927	-0.268919	0.588067	0.13104
LXLOC_010887	-0.998271	6.4742e-10	3.9248e-10
LXLOC_004058	-2.17581	0.00163709	0.000596083
LXLOC_019672	0.127277	0.0410427	0.0119436
LXLOC_006020	-1.20799	0.0504867	0.0144226
LXLOC_014081	2.1876	0.00736538	0.00243729
LXLOC_012556	-2.06153	5.64945e-08	3.05588e-08
LXLOC_000956	-0.229538	3.45461e-06	1.64222e-06
LXLOC_003501	-0.120527	0.746506	0.160377
LXLOC_000339	-0.127734	0.112626	0.0300244
LXLOC_016359	-0.685759	6.03576e-07	3.03826e-07
LXLOC_010992	-0.717203	4.55035e-08	2.47614e-08
LXLOC_016347	-0.811502	0.142618	0.0372948
LXLOC_018589	-0.954282	1.65047e-10	1.02949e-10
LXLOC_011799	-0.438382	5.91849e-09	3.40374e-09
LXLOC_008142	-0.686874	0.166153	0.0428407
LXLOC_005112	0.16075	0.127362	0.0336179
LXLOC_013792	-0.51688	0.00220575	0.000787387
LXLOC_003226	0.0145579	0.902285	0.188289
LXLOC_021575	-0.221694	0.0296546	0.00884623
LXLOC_009624	-0.366003	0.281148	0.0684477
LXLOC_019741	0.0824144	0.473164	0.108523
LXLOC_010284	0.320046	0.35421	0.0840966
LXLOC_000433	-3.51284	0.023433	0.00711866
LXLOC_019168	0.357492	3.17402e-06	1.51472e-06
LXLOC_020473	-0.0630964	0.427925	0.0993811
LXLOC_009611	-3.09781	0.00853279	0.00279227
LXLOC_014865	-0.386097	0.0061077	0.00205204
LXLOC_016113	-0.601857	0.00240944	0.000856538
LXLOC_014452	-0.214763	0.268537	0.0657817
LXLOC_018132	0.242043	0.180701	0.046188
LXLOC_020194	-0.479038	0.0402348	0.0117189
LXLOC_007333	-0.485877	0.00640043	0.00214304
LXLOC_009059	0.102072	0.547535	0.123174
LXLOC_010200	-0.0335911	0.326696	0.0782395
LXLOC_005266	0.36335	0.102436	0.0275405
LXLOC_019747	0.120429	3.30413e-11	2.13579e-11
LXLOC_011371	-0.507478	3.0446e-05	1.33625e-05
LXLOC_000941	-0.876528	2.36699e-14	1.7338e-14
LXLOC_009732	3.53155	0.00161731	0.000589668
LXLOC_021725	0.146119	0.479469	0.109774
LXLOC_013801	-0.829896	1.69145e-07	8.85205e-08
LXLOC_014803	-0.211675	0.0983339	0.0265586
LXLOC_011958	-0.251309	0.00174928	0.000634057
LXLOC_019688	0.244098	0.0264119	0.0079506
LXLOC_017827	-0.0591262	0.891919	0.186587
LXLOC_012304	0.294511	0.524399	0.118695
LXLOC_020834	0.0946349	0.125534	0.033189
LXLOC_010164	0.160115	0.314936	0.0757203
LXLOC_013883	-0.927882	0.152395	0.0395935
LXLOC_021126	-0.579767	0.23907	0.0592602
LXLOC_006791	0.423274	2.84456e-36	3.62009e-36
LXLOC_017568	-0.150274	0.573711	0.128355
LXLOC_014937	-0.476806	6.54933e-06	3.04131e-06
LXLOC_003852	1.56962	3.91575e-05	1.70136e-05
LXLOC_003700	0.872564	1.14435e-11	7.55673e-12
LXLOC_005904	0.0915707	0.503133	0.114639
LXLOC_020222	-0.593045	0.0205829	0.00632862
LXLOC_014267	-0.681721	0.00653644	0.00218261
LXLOC_019937	-0.0226562	0.623367	0.137709
LXLOC_020388	-2.84049	3.56523e-09	2.07573e-09
LXLOC_006329	4.67144	0.000327	0.000129369
LXLOC_001011	-0.0417733	0.237739	0.0589721
LXLOC_006562	-2.29045	7.69416e-06	3.55171e-06
LXLOC_007363	-3.03939	1.1939e-21	1.10578e-21
LXLOC_013929	0.0532593	0.819374	0.173517
LXLOC_004176	1.20243	2.84663e-24	2.82519e-24
LXLOC_006105	-1.15027	0.0365535	0.01072
LXLOC_010170	0.269155	0.216355	0.0541949
LXLOC_002835	-0.478897	0.0166123	0.00519457
LXLOC_021193	-0.0153445	0.975631	0.200123
LXLOC_018250	-0.716567	0.00179495	0.000649167
LXLOC_008719	3.27748	8.75861e-246	4.62576e-245
LXLOC_020119	-0.113185	0.224008	0.0559259
LXLOC_008116	-1.73524	0.0998893	0.0269074
LXLOC_015980	-0.0195372	0.934773	0.193488
LXLOC_011895	-1.50633	6.80589e-17	5.42063e-17
LXLOC_019951	-0.266256	0.00168197	0.000611425
LXLOC_011514	-1.03314	0.000956338	0.000359359
LXLOC_008475	-1.27153	2.70603e-21	2.48188e-21
LXLOC_001987	-0.990216	0.000935829	0.000352166
LXLOC_017336	-0.981321	2.62869e-05	1.15933e-05
LXLOC_004037	-0.312545	0.0887606	0.0241784
LXLOC_018697	-0.113552	0.720017	0.15575
LXLOC_021741	-0.428072	2.92725e-26	3.04793e-26
LXLOC_008688	-3.88208	9.29515e-08	4.95618e-08
LXLOC_020160	-0.149485	0.0597705	0.016838
LXLOC_020131	1.26427	0.145466	0.0379787
LXLOC_009417	0.653947	1.10764e-05	5.04262e-06
LXLOC_005523	0.0721184	0.884108	0.185238
LXLOC_011741	-0.582385	0.0187805	0.0058183
LXLOC_017623	-0.290452	0.288555	0.0700408
LXLOC_008978	0.33271	0.250739	0.0618553
LXLOC_020296	-1.10163	3.30849e-05	1.44792e-05
LXLOC_004006	-1.1263	1.95373e-09	1.15451e-09
LXLOC_019241	0.11606	0.13699	0.0359287
LXLOC_012131	0.840793	0.0144132	0.00454671
LXLOC_007216	-2.98678	1.64218e-05	7.36721e-06
LXLOC_019395	0.0395064	0.884586	0.185314
LXLOC_018127	2.07212	0.00406575	0.0014002
LXLOC_015120	1.53509	3.67691e-09	2.13999e-09
LXLOC_003692	-0.297638	0.14223	0.0372074
LXLOC_003217	-0.430992	0.00657164	0.00219331
LXLOC_021066	0.0903357	0.0146305	0.00461256
LXLOC_000770	-1.20352	0.00133752	0.000493093
LXLOC_004652	0.371679	0.230739	0.057387
LXLOC_003375	0.161853	0.00570878	0.0019278
LXLOC_000486	-1.8704	3.80489e-13	2.67492e-13
LXLOC_017852	0.287847	0.414752	0.0966519
LXLOC_007981	-0.735237	0.0637574	0.0178778
LXLOC_005573	0.604786	0.000967571	0.000363384
LXLOC_012655	-2.4722	3.96216e-06	1.87331e-06
LXLOC_011901	-1.36845	0.00127428	0.000471483
LXLOC_018888	-0.404505	9.34276e-07	4.6362e-07
LXLOC_015397	0.873892	2.29165e-05	1.01626e-05
LXLOC_008796	-1.17843	0.000111728	4.63681e-05
LXLOC_008125	-0.386692	0.00286977	0.00100912
LXLOC_019782	-1.16086	3.93205e-12	2.6476e-12
LXLOC_014895	0.0508837	0.589693	0.131277
LXLOC_010395	2.83293	2.48849e-31	2.88908e-31
LXLOC_015037	-0.779164	1.1338e-06	5.60017e-07
LXLOC_007739	-0.6984	0.0225224	0.00687359
LXLOC_020990	-0.341351	0.000243342	9.76609e-05
LXLOC_003353	-0.760154	1.80749e-06	8.79728e-07
LXLOC_013582	-0.496724	0.0373869	0.0109443
LXLOC_003508	-0.36558	0.00122066	0.000452704
LXLOC_004420	-0.619044	0.0008035	0.000304309
LXLOC_002758	0.308265	0.0035505	0.00123334
LXLOC_013876	0.568367	5.18867e-14	3.7545e-14
LXLOC_009782	-0.163805	0.515838	0.117061
LXLOC_019253	0.971705	3.54533e-05	1.54645e-05
LXLOC_000725	-0.0835792	0.430355	0.0998602
LXLOC_020829	0.27165	0.0462764	0.0132975
LXLOC_014331	-0.0846071	0.73925	0.159116
LXLOC_017543	-0.927882	7.11566e-15	5.30569e-15
LXLOC_019971	-0.940938	7.73176e-20	6.78256e-20
LXLOC_006218	0.0159107	0.849539	0.17906
LXLOC_011284	-0.755045	0.0173886	0.00541966
LXLOC_014429	-0.216378	9.56674e-21	8.63201e-21
LXLOC_021375	-0.761935	7.99291e-23	7.63105e-23
LXLOC_013221	-2.56015	9.50255e-06	4.34835e-06
LXLOC_009479	-0.342919	0.443454	0.102535
LXLOC_004174	1.10575	2.46578e-11	1.60235e-11
LXLOC_010190	-0.0958299	0.578058	0.129121
LXLOC_009911	0.59568	0.200915	0.0507532
LXLOC_021259	0.314059	0.00603034	0.00202939
LXLOC_011784	0.284129	0.0200501	0.00617568
LXLOC_009870	-0.121419	0.216032	0.0541333
LXLOC_000198	-1.30639	0.0690087	0.0192211
LXLOC_014634	0.70175	7.81476e-05	3.29883e-05
LXLOC_005482	-0.406042	0.0879388	0.0239826
LXLOC_017287	-0.677903	0.0120645	0.00385447
LXLOC_019120	0.223148	0.00801623	0.00263627
LXLOC_018861	-0.287008	0.0961142	0.026005
LXLOC_012574	0.162884	0.476614	0.109212
LXLOC_017651	-0.203516	0.518876	0.117652
LXLOC_016861	-0.0167227	0.828517	0.175218
LXLOC_019449	0.0895159	0.0967908	0.0261736
LXLOC_020684	-3.30273	4.04996e-10	2.4785e-10
LXLOC_013287	-0.649417	2.64953e-12	1.79912e-12
LXLOC_016503	0.696609	0.0623067	0.017486
LXLOC_012155	-0.912955	7.26343e-06	3.36016e-06
LXLOC_015561	-0.387313	0.193495	0.0490231
LXLOC_005056	-0.828346	0.0660269	0.018456
LXLOC_016488	-8.37563	3.9853e-36	5.06001e-36
LXLOC_009379	-0.0684093	0.594157	0.132157
LXLOC_003787	0.879473	0.160763	0.0415935
LXLOC_021202	-0.0141758	0.829103	0.175334
LXLOC_005848	0.0721184	0.448804	0.103582
LXLOC_003658	-0.12719	0.41138	0.0959302
LXLOC_010325	-1.56834	2.52998e-05	1.1177e-05
LXLOC_020768	-0.416282	0.0812494	0.0223061
LXLOC_008499	-3.24981	0.0451574	0.0130041
LXLOC_011343	0.327163	2.87917e-08	1.58703e-08
LXLOC_001082	1.68987	8.45958e-40	1.14064e-39
LXLOC_002171	-0.342919	0.322475	0.0773649
LXLOC_015009	-1.17404	2.81888e-06	1.3509e-06
LXLOC_011738	0.170803	0.200396	0.0506377
LXLOC_007813	-2.30639	2.25251e-14	1.65262e-14
LXLOC_011206	0.0925825	0.703157	0.152676
LXLOC_020120	-4.51284	0.000535552	0.000206911
LXLOC_013008	-1.44347	5.65913e-28	6.13921e-28
LXLOC_017675	0.809084	0.435074	0.100793
LXLOC_019678	-2.36084	7.9856e-05	3.36804e-05
LXLOC_013548	0.466978	0.0716545	0.0198883
LXLOC_009449	1.83765	0.00623335	0.00209153
LXLOC_010220	-0.583927	0.0654275	0.0183084
LXLOC_003956	-2.67204	2.66322e-11	1.7279e-11
LXLOC_003623	0.0721184	0.660866	0.144759
LXLOC_014678	-0.137335	0.69291	0.150813
LXLOC_021188	0.930661	0.00484338	0.00165002
LXLOC_006121	3.1876	3.42206e-06	1.62786e-06
LXLOC_013440	3.39405	0.0364302	0.010689
LXLOC_007749	-0.642377	1.2482e-07	6.59722e-08
LXLOC_007881	0.548556	0.161329	0.0417265
LXLOC_013769	-1.16463	1.13884e-08	6.43013e-09
LXLOC_020675	-0.144551	0.503645	0.11473
LXLOC_018619	-0.476779	1.23973e-20	1.11469e-20
LXLOC_003325	-0.210281	0.510239	0.115983
LXLOC_016432	-1.07988	0.000783905	0.000297141
LXLOC_000924	-2.28543	1.86275e-06	9.05366e-07
LXLOC_013764	0.0225363	0.893997	0.186942
LXLOC_001754	-1.16629	1.08748e-15	8.33457e-16
LXLOC_010232	-0.747309	0.0817029	0.0224155
LXLOC_021232	-1.51076	1.6688e-150	5.88205e-150
LXLOC_020439	-0.443572	3.78698e-18	3.14779e-18
LXLOC_001803	1.53155	0.053159	0.0151208
LXLOC_017075	0.137283	0.236121	0.0586124
LXLOC_004842	-1.44245	0.0150043	0.00472314
LXLOC_020863	0.1167	0.878684	0.184272
LXLOC_018746	-0.0329727	0.165235	0.0426242
LXLOC_014296	0.75019	0.355051	0.0842555
LXLOC_019080	-1.07832	2.31345e-88	5.37556e-88
LXLOC_001175	0.80363	1.71264e-08	9.5739e-09
LXLOC_017093	-1.236	0.000495823	0.00019226
LXLOC_014975	0.168334	0.0909035	0.0247167
LXLOC_021525	-1.15877	0.0118223	0.00378203
LXLOC_014879	0.277211	0.0183466	0.00569322
LXLOC_021712	0.523688	0.148409	0.0386812
LXLOC_011151	-0.386172	0.0279597	0.00838712
LXLOC_009961	-0.660296	3.45312e-05	1.50771e-05
LXLOC_012502	0.282397	5.5628e-14	4.02165e-14
LXLOC_020241	-0.0801609	0.807268	0.171316
LXLOC_020875	0.105113	0.6816	0.148741
LXLOC_001167	-1.1715	2.22635e-13	1.57809e-13
LXLOC_004482	0.175229	0.634474	0.139841
LXLOC_016874	-1.92788	0.181381	0.0462917
LXLOC_020129	-0.917364	0.277998	0.0677907
LXLOC_011400	-0.163115	0.1665	0.0429233
LXLOC_006016	-3.92788	0.00646871	0.00216147
LXLOC_015407	0.726477	5.39276e-11	3.449e-11
LXLOC_009114	-3.73524	0.012264	0.00390877
LXLOC_018458	2.07212	0.150858	0.039238
LXLOC_019968	-0.813087	4.28838e-05	1.85667e-05
LXLOC_006337	-0.777639	2.51607e-05	1.11186e-05
LXLOC_000001	0.0447982	0	0
LXLOC_010636	-0.340322	0.0346359	0.0102133
LXLOC_021519	-0.297576	0.0106676	0.00344437
LXLOC_014893	-0.0956091	0.559886	0.125624
LXLOC_004335	-0.525584	1.76641e-23	1.71691e-23
LXLOC_018873	-0.0900451	0.0257482	0.00776526
LXLOC_003340	-1.24981	8.55829e-05	3.59843e-05
LXLOC_004247	-0.0672847	0.778956	0.166136
LXLOC_011683	0.574619	3.47962e-06	1.65395e-06
LXLOC_020303	0.128261	0.217064	0.0543504
LXLOC_021003	-0.127858	0.667183	0.145966
LXLOC_021473	-0.123973	0.114429	0.0304681
LXLOC_021550	0.011682	0.785459	0.167355
LXLOC_002126	-0.294263	0.00840155	0.00275448
LXLOC_002985	-3.73524	0.012264	0.00390877
LXLOC_002514	-1.60906	7.17834e-23	6.86005e-23
LXLOC_018685	-0.787861	2.53876e-19	2.1875e-19
LXLOC_000323	-2.04336	1.4536e-05	6.55061e-06
LXLOC_013619	-1.01534	0.0162273	0.00508067
LXLOC_021431	0.739139	9.95895e-28	1.07372e-27
LXLOC_016574	1.41607	0.00158199	0.000577695
LXLOC_018473	-1.92788	0.0010612	0.000396388
LXLOC_015216	-1.27433	3.05826e-06	1.46161e-06
LXLOC_007239	-3.09781	0.00853279	0.00279227
LXLOC_019567	0.0697963	0.166646	0.0429565
LXLOC_011906	1.17165	3.93746e-05	1.71064e-05
LXLOC_020074	-0.902014	0.065492	0.0183242
LXLOC_013258	0.313126	0.288416	0.0700104
LXLOC_020229	-0.178271	0.00267776	0.000945198
LXLOC_002748	-0.975187	0.000120579	4.98846e-05
LXLOC_018531	-0.92578	2.13689e-45	3.13605e-45
LXLOC_011844	1.35223	0.000149403	6.12661e-05
LXLOC_004152	-0.107555	0.510538	0.116041
LXLOC_020810	0.0875484	0.472282	0.108336
LXLOC_002614	0.0248126	0.946447	0.195389
LXLOC_017911	0.152289	0.52652	0.119065
LXLOC_010719	-0.402524	6.64013e-08	3.57439e-08
LXLOC_000414	0.0721184	0.951174	0.196109
LXLOC_012614	1.17165	0.0659817	0.0184465
LXLOC_006909	1.27521	4.43299e-07	2.25137e-07
LXLOC_012563	-1.21019	1.29843e-12	8.92325e-13
LXLOC_011927	-0.708569	0.0130138	0.0041276
LXLOC_019859	0.420341	0.00114995	0.000427777
LXLOC_003631	0.10418	0.628051	0.138625
LXLOC_004836	-0.629076	2.42224e-05	1.07204e-05
LXLOC_021512	0.159581	0.65323	0.143419
LXLOC_003941	-0.430382	0.425257	0.0988226
LXLOC_001558	-0.368454	0.206443	0.0520161
LXLOC_003604	-1.19197	0.0276996	0.00831522
LXLOC_004723	-0.293036	3.30175e-07	1.69177e-07
LXLOC_006441	-1.3202	1.88933e-07	9.84868e-08
LXLOC_020142	-2.947	0.00114505	0.000426096
LXLOC_007854	-0.645151	0.000100202	4.18077e-05
LXLOC_010465	0.303444	0.45775	0.105358
LXLOC_018158	-0.0478863	0.370691	0.0875891
LXLOC_005066	4.39405	0.00127762	0.00047254
LXLOC_018650	-0.0953005	0.12018	0.0318854
LXLOC_014586	-1.13433	0.000474738	0.000184478
LXLOC_014900	0.0279013	0.817138	0.173125
LXLOC_018486	-1.04987	0.000267436	0.000106843
LXLOC_020284	1.72741	0.0228545	0.00696495
LXLOC_018241	1.29451	9.68627e-07	4.80277e-07
LXLOC_003721	-0.074723	0.842403	0.177763
LXLOC_018399	-0.937468	2.1296e-06	1.03158e-06
LXLOC_002594	4.24204	0.00245607	0.000871659
LXLOC_008939	0.879473	0.0473176	0.0135815
LXLOC_004645	0.196446	0.325133	0.0779339
LXLOC_020014	0.355911	0.213883	0.0536252
LXLOC_021318	-0.927882	0.0728117	0.0201866
LXLOC_018717	0.573221	0.0665688	0.0186043
LXLOC_000798	-0.610691	0.00330756	0.00115436
LXLOC_015307	0.502753	2.40232e-05	1.0637e-05
LXLOC_005319	1.17903	0.0115854	0.00371499
LXLOC_020248	-0.788576	1.12542e-07	5.96438e-08
LXLOC_003619	-0.588698	1.74438e-10	1.08737e-10
LXLOC_004732	-1.08316	0.00234649	0.000834827
LXLOC_004223	-0.101497	0.173635	0.0445564
LXLOC_004405	-0.364945	0.119754	0.0317829
LXLOC_007908	-3.60823	0.00159135	0.000580986
LXLOC_002997	-0.512844	0.335157	0.0800623
LXLOC_020110	0.402945	0.115647	0.0307712
LXLOC_000896	-0.847041	8.42995e-29	9.30591e-29
LXLOC_001844	-3.24981	0.0451574	0.0130041
LXLOC_015637	-1.22486	8.69099e-06	3.9934e-06
LXLOC_020658	-1.25486	1.3859e-16	1.09262e-16
LXLOC_002177	-1.2477	2.2856e-19	1.96971e-19
LXLOC_019267	-0.478655	0.00837241	0.0027453
LXLOC_009044	0.984656	0.0197477	0.00609286
LXLOC_020005	0.879473	0.0151315	0.00476011
LXLOC_000656	0.0300543	0.784976	0.167274
LXLOC_007008	-0.576234	2.93287e-62	5.3678e-62
LXLOC_019658	-1.52361	4.22838e-09	2.45482e-09
LXLOC_000206	0.235617	0.0928853	0.0252024
LXLOC_002842	-0.81023	2.48368e-05	1.09824e-05
LXLOC_017240	-1.62832	0.000205129	8.29708e-05
LXLOC_013993	3.24204	1.55478e-11	1.02078e-11
LXLOC_005160	0.335153	0.700605	0.152163
LXLOC_017816	-3.09781	0.00853279	0.00279227
LXLOC_001584	-0.372666	0.236444	0.0586776
LXLOC_019732	-0.152594	0.509569	0.115868
LXLOC_007862	-0.309245	3.13087e-05	1.37288e-05
LXLOC_018663	-0.180516	0.180333	0.0460986
LXLOC_018284	-0.18763	0.147766	0.03853
LXLOC_006830	-1.6309	1.89305e-12	1.29352e-12
LXLOC_005947	0.15584	0.166909	0.0430219
LXLOC_002286	1.07212	0.125788	0.0332418
LXLOC_009859	-0.150274	0.674972	0.147485
LXLOC_004909	0.970239	0.000227667	9.16406e-05
LXLOC_000929	-2.51284	6.03325e-31	6.94844e-31
LXLOC_004526	0.732632	0.0249554	0.00754183
LXLOC_011576	-0.914461	9.29473e-05	3.8887e-05
LXLOC_020582	-1.86279	1.40341e-07	7.39121e-08
LXLOC_018768	0.361625	0.429067	0.0995897
LXLOC_010726	-0.124158	0.416259	0.0969755
LXLOC_004985	-0.396607	0.00219087	0.000782416
LXLOC_011795	0.190763	0.4245	0.0987169
LXLOC_011612	0.946587	0.061425	0.0172687
LXLOC_019129	0.674148	2.30454e-07	1.19482e-07
LXLOC_011392	0.631546	0.0100164	0.00324544
LXLOC_015785	-0.593014	0.00634717	0.00212651
LXLOC_015808	0.0400117	0.0690762	0.0192359
LXLOC_010176	0.0373529	0.906104	0.188893
LXLOC_005355	-1.28152	3.67192e-05	1.59911e-05
LXLOC_016220	-1.69342	0.0117169	0.00375149
LXLOC_018758	0.198964	0.00116258	0.000432246
LXLOC_021357	0.0367895	0.731864	0.157852
LXLOC_021457	0.601047	0.00689802	0.00229442
LXLOC_005029	-0.882078	5.78062e-07	2.91463e-07
LXLOC_010499	-1.10721	0.000103436	4.30726e-05
LXLOC_021657	1.46843	4.96755e-05	2.13862e-05
LXLOC_006460	1.48716	0.106621	0.028573
LXLOC_019368	-0.409153	0.00778641	0.0025669
LXLOC_002845	-0.268587	0.0345498	0.0101904
LXLOC_018178	0.0597346	0.751959	0.161185
LXLOC_009170	-0.930617	2.34631e-14	1.71938e-14
LXLOC_018036	-0.79156	0.000431772	0.000168491
LXLOC_013659	-0.0511084	0.753618	0.161484
LXLOC_021281	-0.998271	0.00842637	0.00276207
LXLOC_007176	3.65708	0.0183068	0.00568159
LXLOC_004124	0.0513598	0.833755	0.176211
LXLOC_012450	-0.664847	0.266602	0.0653372
LXLOC_019699	-1.23274	0.00178576	0.000646323
LXLOC_000919	1.02306	0.27273	0.0666789
LXLOC_005190	-0.785863	6.38879e-05	2.72034e-05
LXLOC_010739	1.40915	0.000147002	6.03523e-05
LXLOC_016043	-4.45144	1.76419e-06	8.59851e-07
LXLOC_008452	-0.0120656	0.886446	0.185648
LXLOC_019409	-0.905486	3.58119e-13	2.52127e-13
LXLOC_008787	0.0721184	0.925479	0.191926
LXLOC_004134	-0.420922	0.0986343	0.0266338
LXLOC_010179	-0.386641	0.00416109	0.00143173
LXLOC_019252	0.199825	0.0184318	0.00571712
LXLOC_004892	0.735083	0.00174209	0.000631498
LXLOC_016570	-0.845419	0.00355574	0.00123499
LXLOC_001408	-0.617926	2.90086e-05	1.27534e-05
LXLOC_002301	0.79149	1.2255e-05	5.56367e-06
LXLOC_010274	-0.231379	0.00145645	0.000534204
LXLOC_019803	-0.34102	0.0133127	0.00421803
LXLOC_019383	-0.408048	0.00645349	0.00215918
LXLOC_020264	-0.452215	4.55355e-13	3.18888e-13
LXLOC_019540	-0.590033	2.37543e-12	1.61681e-12
LXLOC_018985	0.125387	0.236607	0.058715
LXLOC_000479	-2.62832	0.00362149	0.00125604
LXLOC_021326	0.657081	0.00764045	0.00252235
LXLOC_004116	-0.562597	0.0577314	0.0163161
LXLOC_016905	0.223302	0.000469018	0.000182372
LXLOC_014814	0.225825	1.77001e-08	9.88781e-09
LXLOC_017860	0.0107178	0.95026	0.196035
LXLOC_008276	-1.39216	4.3137e-29	4.78568e-29
LXLOC_006075	-0.114295	0.755325	0.161765
LXLOC_008538	-0.56891	0.00019395	7.86896e-05
LXLOC_020663	-0.121576	0.514807	0.116864
LXLOC_011562	-0.422066	2.72948e-12	1.85161e-12
LXLOC_019739	0.2212	0.56177	0.125966
LXLOC_005778	-0.074723	0.778576	0.166076
LXLOC_005810	0.329726	0.085639	0.0234075
LXLOC_009459	-0.554423	1.05122e-25	1.081e-25
LXLOC_017065	-0.359598	0.212868	0.0534035
LXLOC_020550	0.405909	0.00301767	0.00105801
LXLOC_020532	0.570924	0.000337651	0.000133436
LXLOC_003816	-0.245404	0.00131481	0.000485415
LXLOC_011649	-0.59735	8.9371e-63	1.64368e-62
LXLOC_018962	-0.273429	0.404665	0.094603
LXLOC_015967	1.49435	2.7812e-06	1.33362e-06
LXLOC_000240	0.550166	0.121059	0.0320945
LXLOC_019276	0.387226	0.000105716	4.39809e-05
LXLOC_018668	-0.109176	0.553414	0.124326
LXLOC_019882	-1.36845	0.022721	0.0069286
LXLOC_003998	-3.75715	7.82916e-41	1.07128e-40
LXLOC_015248	0.171654	0.748724	0.160717
LXLOC_013228	-1.92788	0.181381	0.0462917
LXLOC_021504	-0.945066	0.00282227	0.000992915
LXLOC_005935	-0.700076	0.000214659	8.66324e-05
LXLOC_019047	0.105671	0.63097	0.139194
LXLOC_001594	-0.430382	0.425257	0.0988226
LXLOC_011828	-0.681242	0.0243743	0.00738081
LXLOC_002137	-2.07627	6.00524e-16	4.64393e-16
LXLOC_000966	0.133319	0.252613	0.062283
LXLOC_014180	0.860614	0.108699	0.0290804
LXLOC_020890	-0.0647519	0.445456	0.102906
LXLOC_017363	0.794176	1.08791e-10	6.84872e-11
LXLOC_006621	0.126081	0.143079	0.0374073
LXLOC_005184	-0.187268	0.435348	0.100851
LXLOC_018950	-0.49307	0.25648	0.063141
LXLOC_020971	-0.0451949	0.62989	0.138981
LXLOC_013849	-4.24981	0.00183801	0.000663076
LXLOC_019541	-0.144682	0.115814	0.0308138
LXLOC_021480	-0.21886	0.0268794	0.00808091
LXLOC_007708	-0.568339	0.000282978	0.000112791
LXLOC_009314	0.82058	0.00120262	0.000446353
LXLOC_021708	-0.547769	6.06271e-36	7.67177e-36
LXLOC_016912	0.042972	0.897874	0.187624
LXLOC_011081	-0.44332	0.159786	0.0413713
LXLOC_005707	-1.09015	0.00274145	0.000966287
LXLOC_011043	-2.29045	7.69416e-06	3.55171e-06
LXLOC_007940	-2.70318	8.32909e-28	9.00374e-28
LXLOC_007010	-0.0683629	0.747365	0.160503
LXLOC_018750	-0.228864	0.160909	0.0416268
LXLOC_019617	-0.555644	4.04086e-06	1.90831e-06
LXLOC_003386	0.791566	2.20015e-06	1.0647e-06
LXLOC_019538	0.242043	0.360487	0.0854156
LXLOC_010711	-3.61718	0.0174925	0.00544926
LXLOC_003691	-0.680664	1.83431e-05	8.19837e-06
LXLOC_006314	0.194975	0.512498	0.116427
LXLOC_000249	1.07212	0.279018	0.0679988
LXLOC_020634	0.168334	0.52282	0.118387
LXLOC_017234	0.194109	0.42289	0.0983845
LXLOC_019906	-0.0673398	0.290824	0.0705215
LXLOC_006565	0.159398	0.0361408	0.0106238
LXLOC_009072	0.0959651	0.604835	0.134215
LXLOC_013260	1.53155	0.053159	0.0151208
LXLOC_014945	-0.242671	1.42806e-14	1.05389e-14
LXLOC_020416	0.602633	0.0924094	0.0250913
LXLOC_019335	0.0146993	0.728143	0.157147
LXLOC_008379	-0.372976	2.41541e-06	1.16599e-06
LXLOC_003491	-0.839345	0.00179167	0.000648172
LXLOC_006056	-3.92788	0.00646871	0.00216147
LXLOC_017007	-3.16492	6.34475e-13	4.41925e-13
LXLOC_006110	0.388931	1.85088e-05	8.26941e-06
LXLOC_019340	0.835045	1.40118e-07	7.38028e-08
LXLOC_006469	-0.72159	3.38859e-14	2.46692e-14
LXLOC_011677	-0.223338	0.58886	0.131126
LXLOC_002830	-1.0348	0.0017276	0.000626477
LXLOC_009392	0.000565101	0.998281	0.203949
LXLOC_018690	-0.810102	0.00020719	8.37561e-05
LXLOC_004372	-0.741469	0.0162113	0.00507729
LXLOC_004224	0.54403	2.04236e-09	1.20543e-09
LXLOC_003665	-1.50494	3.65698e-14	2.65954e-14
LXLOC_011091	-0.135395	0.354639	0.0841903
LXLOC_014525	-0.0180794	0.960025	0.197555
LXLOC_012833	-0.236371	0.13309	0.035009
LXLOC_008489	-0.14361	0.684087	0.149157
LXLOC_005354	-2.36845	2.74783e-06	1.31866e-06
LXLOC_005321	0.03259	0.923113	0.191631
LXLOC_016928	2.39405	0.00236906	0.000842673
LXLOC_005968	-1.64409	4.90747e-05	2.11461e-05
LXLOC_018759	-1.44347	8.96811e-15	6.66562e-15
LXLOC_006380	-3.3202	3.42225e-05	1.49463e-05
LXLOC_004879	-1.89751	5.81633e-06	2.71225e-06
LXLOC_016033	-0.336205	0.0214429	0.00657489
LXLOC_019752	0.0689159	0.919229	0.190978
LXLOC_019441	-0.72815	0.000476692	0.000185194
LXLOC_004378	0.0320409	0.893981	0.186942
LXLOC_018474	-1.07988	0.0525035	0.0149491
LXLOC_006801	-0.807587	0.0211454	0.00649056
LXLOC_016389	-0.275805	0.633876	0.139715
LXLOC_016462	-0.430382	0.001426	0.000523741
LXLOC_005632	-0.351632	7.72994e-05	3.26415e-05
LXLOC_008313	0.577708	3.93399e-17	3.16e-17
LXLOC_012693	0.412347	0.0376368	0.011012
LXLOC_010898	-3.03368	2.53857e-34	3.12037e-34
LXLOC_010166	-0.244423	0.0231298	0.00704273
LXLOC_019213	-0.650523	3.55366e-09	2.06949e-09
LXLOC_000159	-2.3202	0.000574687	0.00022121
LXLOC_020502	-1.51284	0.0909336	0.0247181
LXLOC_018488	-0.512844	0.191906	0.0486632
LXLOC_009360	-1.07988	0.0525035	0.0149491
LXLOC_021068	-0.0761514	3.91556e-141	1.31391e-140
LXLOC_014092	2.28511	4.99096e-08	2.70898e-08
LXLOC_012638	-0.664847	0.266602	0.0653372
LXLOC_002295	0.385276	0.105252	0.0282278
LXLOC_000943	0.182779	9.40138e-11	5.94519e-11
LXLOC_010198	0.00983408	0.967946	0.198955
LXLOC_020209	0.672917	6.85155e-06	3.17623e-06
LXLOC_013576	-0.491783	0.027239	0.00818298
LXLOC_010521	-0.565312	0.189174	0.048055
LXLOC_021085	-0.28295	0.0856035	0.0233991
LXLOC_020286	0.419669	1.6489e-28	1.80923e-28
LXLOC_003784	-0.593764	0.000864222	0.000326096
LXLOC_008222	0.297411	0.0708427	0.0196909
LXLOC_019526	-0.129515	0.768736	0.164264
LXLOC_005953	-0.158766	0.122746	0.0325081
LXLOC_008211	0.430272	0.000168363	6.873e-05
LXLOC_020885	-0.940875	0.00154775	0.000566378
LXLOC_003172	-0.439781	0.0834243	0.0228507
LXLOC_019891	-0.0112018	0.868276	0.182457
LXLOC_010957	0.0721184	0.943632	0.19489
LXLOC_012619	-0.0396932	0.767291	0.164012
LXLOC_018899	0.0472234	0.639377	0.140795
LXLOC_015977	1.3384	6.69318e-07	3.35746e-07
LXLOC_010133	0.809084	0.269659	0.0660103
LXLOC_005401	-1.95173	1.42477e-07	7.49885e-08
LXLOC_013894	0.707897	5.53663e-16	4.28697e-16
LXLOC_005726	-0.735237	0.407061	0.0950542
LXLOC_020204	-2.62832	0.00362149	0.00125604
LXLOC_005657	1.11792	2.31132e-07	1.19808e-07
LXLOC_001929	-0.14045	0.113493	0.0302358
LXLOC_001338	-0.775879	0.0158234	0.00496372
LXLOC_005226	-0.150274	0.482879	0.110477
LXLOC_012827	-0.532744	0.0445088	0.0128491
LXLOC_020167	-1.29045	0.00272398	0.000960681
LXLOC_007253	0.145816	0.561548	0.125922
LXLOC_012817	0.174688	0.395539	0.0927129
LXLOC_012417	-3.24981	0.0451574	0.0130041
LXLOC_002246	-0.448714	0.0455306	0.0131024
LXLOC_000429	-1.82097	5.47735e-11	3.50082e-11
LXLOC_010446	-1.12765	3.96153e-22	3.70488e-22
LXLOC_018994	0.0132097	0.897691	0.187594
LXLOC_002015	0.696876	0.0657867	0.0183973
LXLOC_015034	-0.252947	0.00497661	0.00169305
LXLOC_011548	0.45063	0.0484406	0.013877
LXLOC_011349	0.641484	0.00627969	0.00210636
LXLOC_012500	0.230561	0.00103876	0.000388659
LXLOC_021249	-0.819935	2.49654e-05	1.10363e-05
LXLOC_010380	-3.01534	0.000357915	0.000141053
LXLOC_013841	-0.579958	0.399695	0.0935618
LXLOC_010919	-0.693416	4.17749e-07	2.12448e-07
LXLOC_018200	0.46675	0.0208163	0.00639555
LXLOC_012830	-0.394634	2.1161e-05	9.41912e-06
LXLOC_002414	0.294511	0.524399	0.118695
LXLOC_014974	0.513088	1.62561e-114	4.62449e-114
LXLOC_016103	-0.0683629	0.747365	0.160503
LXLOC_002627	1.26476	0.0437022	0.0126416
LXLOC_018262	-0.0958773	3.11805e-07	1.59999e-07
LXLOC_012670	0.377927	0.0974083	0.0263304
LXLOC_015839	0.114142	0.421956	0.0982045
LXLOC_021148	-0.942929	0.127926	0.0337485
LXLOC_005927	-0.761872	0.00342394	0.00119268
LXLOC_018240	0.335153	0.2487	0.0613954
LXLOC_006598	0.965203	0.0387647	0.0113224
LXLOC_002147	-0.47298	0.00131249	0.000484707
LXLOC_001013	-0.0571647	0.871219	0.183
LXLOC_009026	-0.0591262	0.891919	0.186587
LXLOC_014991	0.322662	0.208376	0.0524325
LXLOC_002034	0.394046	0.0189452	0.00586635
LXLOC_017861	0.239509	0.0002963	0.000117842
LXLOC_018799	0.612687	0.27398	0.0669509
LXLOC_003149	-0.843184	2.3192e-07	1.20204e-07
LXLOC_000398	-0.843407	2.83809e-08	1.56474e-08
LXLOC_010490	2.65708	5.93249e-07	2.98905e-07
LXLOC_017809	-0.568458	2.45325e-06	1.18332e-06
LXLOC_016623	-3.17581	0.000110971	4.60774e-05
LXLOC_005385	-0.10705	0.551544	0.123962
LXLOC_001390	-1.39851	1.66741e-07	8.73184e-08
LXLOC_017975	0.134944	0.632949	0.139571
LXLOC_009738	4.8033	0.000157002	6.42636e-05
LXLOC_014132	-0.00829613	0.96329	0.198115
LXLOC_013720	-0.499982	2.1097e-07	1.09644e-07
LXLOC_018328	-0.852877	1.42264e-13	1.01531e-13
LXLOC_004739	-0.512844	0.297876	0.0720388
LXLOC_005197	-0.504282	0.000383492	0.000150684
LXLOC_010403	0.542569	0.000200921	8.13494e-05
LXLOC_013938	0.712664	1.65759e-35	2.08138e-35
LXLOC_009944	1.33515	0.0685195	0.0191037
LXLOC_021236	-1.20583	7.77729e-160	2.88021e-159
LXLOC_014206	-0.150207	5.95828e-07	3.00111e-07
LXLOC_018207	-0.281519	0.533617	0.12037
LXLOC_019191	-0.0165192	0.814773	0.172684
LXLOC_019384	-0.559231	0.00454228	0.001556
LXLOC_020534	0.657081	0.382574	0.0900189
LXLOC_010511	0.351429	0.0113684	0.00365115
LXLOC_011886	0.0627637	0.615278	0.136186
LXLOC_014935	0.149195	0.179479	0.0458995
LXLOC_016098	-1.15027	0.0365535	0.01072
LXLOC_006568	-0.960303	0.00018823	7.64765e-05
LXLOC_016903	-5.68277	9.30697e-08	4.96086e-08
LXLOC_011919	-0.256504	0.382746	0.0900463
LXLOC_011669	0.428262	0.264206	0.0648442
LXLOC_010748	-0.719516	5.59441e-12	3.74325e-12
LXLOC_005416	0.622315	0.0120305	0.00384513
LXLOC_010085	0.696083	6.43515e-40	8.69597e-40
LXLOC_005178	-0.054414	0.765186	0.163594
LXLOC_008394	0.239234	0.0261704	0.00788227
LXLOC_011522	0.913545	8.8275e-65	1.65777e-64
LXLOC_011278	0.434688	0.548285	0.123304
LXLOC_003274	-0.672691	0.0628708	0.0176399
LXLOC_011560	-0.20972	0.0455763	0.0131147
LXLOC_018782	1.65708	0.0640736	0.0179541
LXLOC_014903	-0.0692375	0.774249	0.165312
LXLOC_002426	-0.518006	0.00667826	0.00222587
LXLOC_021285	-0.485268	0.00108061	0.00040324
LXLOC_016753	-0.187825	0.291508	0.07067
LXLOC_020253	0.1312	0.0802279	0.0220516
LXLOC_021499	0.522417	0.0492977	0.0141035
LXLOC_019580	0.584141	0.346256	0.0824641
LXLOC_014491	-0.48259	1.50112e-24	1.50077e-24
LXLOC_019719	-0.891356	0.020935	0.00643002
LXLOC_010314	-0.130242	0.287255	0.0697492
LXLOC_000231	2.07212	0.0422014	0.0122473
LXLOC_021358	-0.136285	0.758577	0.162348
LXLOC_017455	2.1876	0.00736538	0.00243729
LXLOC_010112	-0.57545	8.32178e-43	1.17412e-42
LXLOC_020075	0.5806	9.08367e-11	5.74948e-11
LXLOC_020723	-0.441211	0.000515018	0.000199355
LXLOC_011484	-1.32643	0.0059967	0.00201918
LXLOC_004431	-1.64344	1.12875e-76	2.3687e-76
LXLOC_020730	-1.29874	4.23455e-07	2.15238e-07
LXLOC_019624	-1.78814	1.99065e-05	8.87604e-06
LXLOC_001346	-1.06539	0.154954	0.0401966
LXLOC_013421	-0.682769	0.127037	0.0335394
LXLOC_020581	-1.24981	0.00394517	0.00136117
LXLOC_016647	-0.706754	0.00011119	4.61602e-05
LXLOC_017689	-0.217388	0.736764	0.158664
LXLOC_009460	-0.457098	4.92961e-14	3.56968e-14
LXLOC_000923	-1.43038	0.0258582	0.00779303
LXLOC_017638	-1.07084	0.00171909	0.000623714
LXLOC_017292	-1.92788	0.0010612	0.000396388
LXLOC_002677	0.124586	0.0116823	0.00374286
LXLOC_008278	-1.7973	5.25955e-10	3.19955e-10
LXLOC_010586	3.39405	0.0364302	0.010689
LXLOC_016663	-0.373418	2.92703e-09	1.7123e-09
LXLOC_008486	2.87947	0.00116633	0.000433409
LXLOC_009285	-0.38658	0.0060484	0.00203449
LXLOC_020718	-0.163796	0.767982	0.164138
LXLOC_003140	-0.971209	2.39736e-07	1.24137e-07
LXLOC_003899	0.583168	7.25113e-14	5.22757e-14
LXLOC_014198	-0.677338	0.0016861	0.000612789
LXLOC_013834	0.0804424	0.586112	0.130718
LXLOC_011337	-0.927882	0.279329	0.0680543
LXLOC_019429	-0.590847	0.260387	0.0640063
LXLOC_013356	-1.15027	0.0878104	0.0239515
LXLOC_014871	-1.66051	0.0569629	0.0161138
LXLOC_020711	3.65708	0.0183068	0.00568159
LXLOC_008561	-0.282312	0.190886	0.0484388
LXLOC_010972	0.674783	0.0563907	0.0159621
LXLOC_013987	-0.992012	0.0524483	0.0149377
LXLOC_004265	0.69727	0.00343512	0.00119572
LXLOC_018699	-0.0978066	0.888927	0.186096
LXLOC_018265	0.0994795	0.291061	0.0705685
LXLOC_004315	0.103915	0.169909	0.0436941
LXLOC_011709	-0.177312	9.3954e-05	3.9288e-05
LXLOC_015956	0.920115	0.0985124	0.0266024
LXLOC_020836	-0.0358155	0.624126	0.137859
LXLOC_005737	-0.962647	0.000300319	0.000119402
LXLOC_005469	-0.246861	7.17854e-15	5.35013e-15
LXLOC_002314	0.657081	0.475886	0.109076
LXLOC_008940	-0.314905	0.551716	0.12399
LXLOC_019653	0.75019	0.355051	0.0842555
LXLOC_019784	3.43618	2.03044e-21	1.86925e-21
LXLOC_015721	-0.503096	0.000126079	5.20633e-05
LXLOC_002193	-0.0904245	0.00924164	0.00301075
LXLOC_005215	-0.738057	0.000374907	0.000147464
LXLOC_016921	-0.537935	0.201389	0.0508599
LXLOC_010781	-1.737	4.24695e-174	1.70151e-173
LXLOC_005565	-0.130699	0.629014	0.1388
LXLOC_015267	-0.687931	0.00245256	0.000870919
LXLOC_013121	1.07212	0.000618761	0.000237206
LXLOC_008043	1.16523	0.00750377	0.00248041
LXLOC_009710	-1.82097	0.00104296	0.000389994
LXLOC_019239	1.67363	1.03223e-153	3.70771e-153
LXLOC_010983	-1.22522	3.20911e-19	2.7554e-19
LXLOC_002450	0.361625	0.0211371	0.00648842
LXLOC_019021	0.244711	1.51632e-06	7.42366e-07
LXLOC_009593	-0.229161	1.09301e-12	7.53376e-13
LXLOC_005343	-0.601653	0.000198726	8.05006e-05
LXLOC_006593	-0.286336	0.350952	0.0834284
LXLOC_012507	0.119368	0.0176908	0.00550719
LXLOC_000766	-0.0309727	0.753322	0.161438
LXLOC_010995	-0.714888	6.76117e-07	3.39052e-07
LXLOC_008354	0.14874	0.583716	0.130225
LXLOC_018251	-3.92788	0.00646871	0.00216147
LXLOC_003138	-0.0721808	0.0822511	0.0225533
LXLOC_009359	0.313126	0.595556	0.132402
LXLOC_021317	-0.326431	0.255397	0.0629028
LXLOC_021444	-2.56276	2.86796e-05	1.26144e-05
LXLOC_011134	0.109715	0.182651	0.0465815
LXLOC_000269	2.97419	0.000651301	0.000249017
LXLOC_013338	-0.24981	0.79566	0.169153
LXLOC_004007	-1.24455	1.3149e-08	7.3978e-09
LXLOC_000727	-0.95936	3.53433e-06	1.67849e-06
LXLOC_014763	4.24204	0.00245607	0.000871659
LXLOC_005788	-1.51284	0.0909336	0.0247181
LXLOC_006546	-2.78071	5.89699e-65	1.11212e-64
LXLOC_009346	0.731081	0.0799274	0.0219752
LXLOC_006022	-0.754897	1.33223e-08	7.49267e-09
LXLOC_006547	-1.17581	0.000455934	0.000177467
LXLOC_009728	-0.0601889	0.687948	0.149886
LXLOC_004363	-0.644089	0.181065	0.0462714
LXLOC_021250	-0.379057	1.15699e-57	1.99172e-57
LXLOC_004218	-0.728112	0.00179271	0.000648408
LXLOC_011518	-0.911641	8.53444e-10	5.14178e-10
LXLOC_020728	-0.29985	0.518021	0.11748
LXLOC_021033	-0.0446368	0.540651	0.121788
LXLOC_013031	-0.783492	0.0412179	0.0119896
LXLOC_020627	0.940007	2.91771e-63	5.38839e-63
LXLOC_021365	-0.608972	1.5145e-05	6.81441e-06
LXLOC_000799	1.12657	3.46986e-05	1.51412e-05
LXLOC_021104	0.0246365	0.796944	0.169404
LXLOC_007007	-0.620746	1.7401e-51	2.7723e-51
LXLOC_013154	-4.73524	0.000159576	6.52625e-05
LXLOC_004544	-0.413308	0.0563135	0.0159421
LXLOC_005991	0.0721184	0.92035	0.191146
LXLOC_003112	-1.56015	1.3787e-10	8.63488e-11
LXLOC_007518	-0.790378	0.135654	0.035625
LXLOC_013381	1.18664	1.52803e-14	1.12682e-14
LXLOC_017906	-1.34292	1.34787e-06	6.62017e-07
LXLOC_002553	0.566883	0.0446093	0.0128766
LXLOC_021425	-1.27676	0.0364434	0.0106922
LXLOC_019314	-0.115035	1.52447e-08	8.54541e-09
LXLOC_017227	-0.349433	4.13302e-05	1.79305e-05
LXLOC_010709	-0.205987	5.62014e-10	3.41466e-10
LXLOC_020443	0.743496	0.0333805	0.00988303
LXLOC_005350	0.78618	6.66094e-07	3.34197e-07
LXLOC_005219	-0.880748	1.68423e-09	9.99001e-10
LXLOC_020053	-0.237331	0.0120858	0.00386051
LXLOC_004942	0.614646	0.0247698	0.00749176
LXLOC_016230	-2.45144	0.000197847	8.01712e-05
LXLOC_008034	-0.0603319	0.662517	0.145081
LXLOC_008131	0.487156	0.140445	0.0367757
LXLOC_010092	-0.24981	0.71419	0.154667
LXLOC_004915	2.97901	0.000631591	0.000241821
LXLOC_016598	0.343068	0.0290902	0.00869801
LXLOC_021467	-0.307467	0.101831	0.0273853
LXLOC_003985	-3.87095	1.85582e-66	3.54914e-66
LXLOC_019330	0.412549	2.35661e-08	1.30575e-08
LXLOC_005850	0.899849	1.00726e-14	7.47633e-15
LXLOC_015495	-0.0948117	0.228414	0.0568578
LXLOC_012532	-1.70978	0.000199624	8.08446e-05
LXLOC_020238	-0.029165	0.878713	0.184272
LXLOC_014146	-0.942095	3.14784e-08	1.73044e-08
LXLOC_019052	-0.500662	0.0709165	0.0197102
LXLOC_021746	0.19854	0.0963953	0.0260724
LXLOC_020322	-1.70455	3.85926e-28	4.2006e-28
LXLOC_002218	-0.0187901	0.917346	0.190684
LXLOC_004865	0.0262034	0.54522	0.122738
LXLOC_000229	0.979009	0.0246823	0.00746714
LXLOC_018988	-0.519903	2.98066e-25	3.0307e-25
LXLOC_017539	2.01767	3.06995e-06	1.46691e-06
LXLOC_000973	0.33411	5.33922e-05	2.29178e-05
LXLOC_011227	-0.264245	0.00937658	0.00304984
LXLOC_010950	-0.271933	0.00259966	0.000919023
LXLOC_012372	-3.92788	0.00646871	0.00216147
LXLOC_017719	-0.863751	1.78543e-06	8.69682e-07
LXLOC_004714	-0.850995	2.26433e-22	2.13476e-22
LXLOC_009797	-0.68461	0.0393518	0.0114788
LXLOC_006292	-0.643077	2.3874e-33	2.88245e-33
LXLOC_018407	-1.45248	0.00124519	0.000461315
LXLOC_008957	-2.04336	0.000400117	0.000156725
LXLOC_019598	1.27188	9.85048e-231	4.86153e-230
LXLOC_011217	1.1876	0.0836129	0.0228972
LXLOC_010911	-0.694291	0.000129133	5.32616e-05
LXLOC_005462	-1.18422	0.00219909	0.00078518
LXLOC_012484	-1.09781	0.187438	0.0476686
LXLOC_019036	2.74501	6.91566e-12	4.60904e-12
LXLOC_017886	-0.257206	0.0655745	0.0183432
LXLOC_012828	-0.190916	0.488542	0.111596
LXLOC_021526	-0.871394	0.218265	0.0546258
LXLOC_009369	0.253655	0.00711106	0.00236031
LXLOC_001059	-0.927882	0.44429	0.102661
LXLOC_015325	0.524631	0.22534	0.056187
LXLOC_021213	-0.825863	0.0922473	0.0250557
LXLOC_005392	-0.435676	0.0620798	0.0174324
LXLOC_002837	-0.595306	0.0193069	0.00596777
LXLOC_001373	-0.664847	0.364373	0.0862294
LXLOC_012631	0.668823	1.02807e-15	7.88789e-16
LXLOC_019762	-0.802351	0.262263	0.0644134
LXLOC_007094	-0.266684	0.0706724	0.0196447
LXLOC_014247	-0.436963	1.8066e-08	1.00865e-08
LXLOC_006838	-0.682769	0.127037	0.0335394
LXLOC_003498	-0.380394	0.0312893	0.00930441
LXLOC_015043	-0.338166	2.74737e-06	1.31857e-06
LXLOC_005890	-0.739406	1.41326e-59	2.48889e-59
LXLOC_007718	1.07212	0.125788	0.0332418
LXLOC_010416	-1.38731	6.27915e-09	3.60522e-09
LXLOC_002376	-0.442455	0.160666	0.0415792
LXLOC_000093	1.01809	2.82765e-61	5.09336e-61
LXLOC_009514	0.809084	0.0809259	0.0222235
LXLOC_016008	0.0415339	0.0397797	0.0115946
LXLOC_012354	0.125067	0.522155	0.118264
LXLOC_004404	0.00511446	0.966906	0.198766
LXLOC_009245	-1.59085	0.0108282	0.00349183
LXLOC_020824	-0.284575	0.179022	0.0457969
LXLOC_015040	-0.122698	0.422813	0.098376
LXLOC_013289	-0.496329	0.000120949	5.00295e-05
LXLOC_002439	0.462908	0.103338	0.0277723
LXLOC_012625	1.42127	1.1673e-08	6.58703e-09
LXLOC_021182	1.53155	0.053159	0.0151208
LXLOC_009528	-0.375165	6.34277e-06	2.94818e-06
LXLOC_005172	-1.07472	0.000672251	0.000256546
LXLOC_000446	-1.80235	2.11073e-08	1.17376e-08
LXLOC_021176	0.414174	0.164131	0.042373
LXLOC_001109	2.65708	0.0414952	0.0120616
LXLOC_009373	-0.661197	0.000168836	6.8906e-05
LXLOC_008427	-0.0505343	0.674458	0.147399
LXLOC_005377	-0.0370689	0.094668	0.0256378
LXLOC_019144	-1.83477	0.0123071	0.00391951
LXLOC_008301	-0.486692	0.000682263	0.000260043
LXLOC_021194	-0.633788	5.60491e-12	3.74976e-12
LXLOC_005100	0.0721184	0.971798	0.199471
LXLOC_003534	-0.178425	0.486635	0.11124
LXLOC_011976	-0.716378	0.00757462	0.00250214
LXLOC_020215	0.290948	0.012484	0.0039714
LXLOC_011296	-0.337535	0.000926437	0.000348792
LXLOC_011283	-0.590847	0.260387	0.0640063
LXLOC_007040	1.80908	0.0379426	0.0110942
LXLOC_001050	-0.732885	3.69342e-14	2.68524e-14
LXLOC_016212	-0.0727778	0.46049	0.105903
LXLOC_021136	-1.60595	0.000869547	0.000327979
LXLOC_003062	0.0721184	0.898571	0.187698
LXLOC_019092	3.65708	0.0183068	0.00568159
LXLOC_014958	0.0983786	0.756896	0.162031
LXLOC_007878	1.49296	1.86423e-07	9.72403e-08
LXLOC_008937	-0.442455	0.0759867	0.0209955
LXLOC_000774	0.441835	0.000293258	0.00011667
LXLOC_000937	-1.43574	4.05422e-156	1.47137e-155
LXLOC_000177	-2.7619	1.11854e-11	7.39029e-12
LXLOC_020305	0.435774	0.0530307	0.0150904
LXLOC_012445	0.657081	0.259637	0.0638477
LXLOC_011989	-1.00773	3.94602e-11	2.53931e-11
LXLOC_008866	0.187596	0.745182	0.16016
LXLOC_019856	-0.0929409	0.787686	0.167786
LXLOC_016417	-0.247599	0.00104443	0.000390512
LXLOC_002138	-1.133	4.02027e-05	1.74522e-05
LXLOC_013333	-1.90651	1.61261e-14	1.18848e-14
LXLOC_005754	0.0237597	0.901957	0.188237
LXLOC_019565	-1.3258	7.1501e-05	3.02766e-05
LXLOC_011285	-0.927882	0.226463	0.0564266
LXLOC_001483	4.07212	0.00475739	0.0016223
LXLOC_002930	-0.757957	0.00161742	0.000589668
LXLOC_005130	-0.880576	0.00458535	0.00156841
LXLOC_003999	-2.45626	1.71683e-11	1.12476e-11
LXLOC_005590	-0.161578	0.513221	0.116558
LXLOC_007354	1.22966	0.00790442	0.00260265
LXLOC_005384	-0.436895	0.00765154	0.0025255
LXLOC_003354	0.527122	0.00834676	0.00273743
LXLOC_004249	-3.09781	0.00853279	0.00279227
LXLOC_003882	0.370482	3.89976e-183	1.62214e-182
LXLOC_010192	0.557545	0.506194	0.115187
LXLOC_013273	-0.0894042	0.44514	0.102838
LXLOC_018620	-0.693726	0.265842	0.0651902
LXLOC_016934	-1.66859	0.0927874	0.0251828
LXLOC_004784	-0.10484	0.172479	0.0442805
LXLOC_013933	-0.029165	0.878713	0.184272
LXLOC_021628	-0.986337	1.29407e-24	1.29535e-24
LXLOC_008756	0.657081	0.614176	0.135967
LXLOC_020808	1.01451	0.00110528	0.000412099
LXLOC_017261	0.53155	0.0166557	0.00520712
LXLOC_009117	0.232583	0.27979	0.0681455
LXLOC_008253	0.496258	0.0199587	0.00615178
LXLOC_001030	0.555133	0.000109182	4.5373e-05
LXLOC_007912	0.913965	4.3947e-36	5.57837e-36
LXLOC_001951	-0.629835	0.0429523	0.0124475
LXLOC_017268	0.283622	0.529574	0.119702
LXLOC_015149	-1.90877	8.9815e-09	5.10887e-09
LXLOC_019073	0.0220758	0.918911	0.190945
LXLOC_008232	-0.450108	0.0191879	0.00593474
LXLOC_002479	1.17026	1.8895e-05	8.43964e-06
LXLOC_005948	-0.0965372	0.342821	0.0817017
LXLOC_013620	4.24204	0.00245607	0.000871659
LXLOC_008697	-1.34619	3.91005e-10	2.39527e-10
LXLOC_015156	0.323657	0.447579	0.103328
LXLOC_014854	0.406537	0.152066	0.0395166
LXLOC_016346	-0.335692	0.0337072	0.00997313
LXLOC_020678	-0.705436	0.00113681	0.000423308
LXLOC_021629	0.835518	2.73498e-29	3.04943e-29
LXLOC_013977	-1.0348	0.0017276	0.000626477
LXLOC_019271	-3.24554	4.75769e-14	3.44722e-14
LXLOC_021786	0.0028557	0.991171	0.202784
LXLOC_020707	0.077677	0.763777	0.163347
LXLOC_002432	-0.434842	0.151379	0.039359
LXLOC_011189	-1.37534	0.00405901	0.00139828
LXLOC_001421	-1.83477	0.0123071	0.00391951
LXLOC_004146	1.03148	0.011302	0.0036322
LXLOC_016257	-0.420363	0.00134878	0.000496982
LXLOC_017715	-0.335385	0.0342388	0.0101066
LXLOC_021025	-0.545705	0.0554598	0.0157195
LXLOC_003559	0.122744	0.748062	0.160603
LXLOC_000835	1.93152	1.06558e-14	7.90199e-15
LXLOC_003207	-1.4369	0.000971418	0.000364689
LXLOC_009011	-1.02742	0.106916	0.0286378
LXLOC_019329	-0.599473	6.16269e-10	3.73827e-10
LXLOC_019231	0.0451293	0.603871	0.134062
LXLOC_017092	-0.572787	0.000990978	0.000371264
LXLOC_004982	0.45063	0.455724	0.104951
LXLOC_006789	0.38075	0.0398122	0.0116027
LXLOC_005936	-1.51284	0.329061	0.0787252
LXLOC_004525	-1.0348	0.0017276	0.000626477
LXLOC_005694	1.73033	1.60013e-10	9.99235e-11
LXLOC_001806	-0.873434	4.61448e-09	2.67232e-09
LXLOC_014343	-0.290751	0.000447026	0.000174152
LXLOC_020505	-2.29712	3.20309e-05	1.40354e-05
LXLOC_016213	0.238276	0.0793455	0.0218397
LXLOC_017156	-0.446294	0.189739	0.0481686
LXLOC_001005	1.18174	1.50378e-05	6.76679e-06
LXLOC_019432	-0.55142	0.00266332	0.000940575
LXLOC_008262	-0.360455	0.0355337	0.0104579
LXLOC_005423	-2.15027	0.00728791	0.00241394
LXLOC_018512	-0.610493	0.000238269	9.57035e-05
LXLOC_005198	-0.705489	0.138699	0.0363477
LXLOC_019761	-0.834772	0.00245776	0.000872196
LXLOC_000234	-0.820966	0.0787749	0.0217181
LXLOC_013928	0.0107178	0.929703	0.192696
LXLOC_006437	-1.23703	4.79767e-22	4.48086e-22
LXLOC_017388	1.07212	0.125788	0.0332418
LXLOC_021116	-0.20049	0.0192695	0.00595698
LXLOC_003846	-0.664847	0.364373	0.0862294
LXLOC_011240	-1.10373	0.000567283	0.000218515
LXLOC_021738	-0.765294	2.78758e-17	2.24948e-17
LXLOC_021724	-2.32998	4.60541e-06	2.16427e-06
LXLOC_008108	1.92012	0.00374211	0.00129558
LXLOC_013547	-0.13363	0.426868	0.0991648
LXLOC_021593	-0.315708	0.0405754	0.0118139
LXLOC_015109	3.87947	0.00929075	0.00302374
LXLOC_003413	-4.83477	8.77774e-05	3.68595e-05
LXLOC_004175	1.27587	3.62403e-13	2.5507e-13
LXLOC_021296	-0.673309	0.028529	0.00854272
LXLOC_020583	-0.812404	0.0179313	0.00557781
LXLOC_007203	-4.18882	6.33268e-47	9.46971e-47
LXLOC_019282	-0.214186	0.479882	0.109853
LXLOC_005438	-0.337757	0.136954	0.0359228
LXLOC_016078	0.226447	0.36932	0.0872946
LXLOC_003693	0.209622	0.378607	0.0891712
LXLOC_020134	2.03136	1.83038e-18	1.53368e-18
LXLOC_000998	-0.342919	0.658152	0.144209
LXLOC_002253	0.140505	0.479347	0.109761
LXLOC_011261	-1.08316	0.00234649	0.000834827
LXLOC_012515	-1.36504	0.0219956	0.00672581
LXLOC_001328	0.680928	4.8367e-05	2.08466e-05
LXLOC_004830	-0.052164	0.656918	0.14399
LXLOC_021631	-0.212155	0.12272	0.032503
LXLOC_003225	-1.83477	0.0123071	0.00391951
LXLOC_007968	-2.2009	2.99812e-08	1.65111e-08
LXLOC_002267	-0.445913	0.00750789	0.0024816
LXLOC_005402	-1.20352	0.00133752	0.000493093
LXLOC_020130	-0.0155604	0.433039	0.100402
LXLOC_012349	0.603463	5.38424e-32	6.34273e-32
LXLOC_000949	-1.61594	3.49329e-08	1.91454e-08
LXLOC_004934	-0.688694	0.00108179	0.000403617
LXLOC_001400	-1.71149	1.15936e-21	1.0742e-21
LXLOC_005872	-0.45567	0.00177834	0.000643829
LXLOC_004173	1.06634	3.83736e-12	2.58491e-12
LXLOC_019843	0.138723	0.204697	0.0516155
LXLOC_005867	-3.38731	0.00249456	0.000884358
LXLOC_017288	-0.29985	0.518021	0.11748
LXLOC_007042	-0.826002	0.0264854	0.00796881
LXLOC_005474	1.65708	3.46619e-05	1.51315e-05
LXLOC_000665	-0.746435	6.07939e-08	3.28124e-08
LXLOC_000485	-2.88208	2.42256e-06	1.1692e-06
LXLOC_013024	0.00789565	0.973017	0.199679
LXLOC_007982	-2.51284	0.0538691	0.0152978
LXLOC_013153	0.0721184	0.971798	0.199471
LXLOC_004637	-0.866481	0.0834037	0.0228463
LXLOC_018317	-0.896773	4.11084e-17	3.29719e-17
LXLOC_005055	-0.342919	0.587882	0.131023
LXLOC_012156	-3.73524	0.012264	0.00390877
LXLOC_021002	0.42464	3.3539e-14	2.44239e-14
LXLOC_010886	-0.595306	0.0193069	0.00596777
LXLOC_019970	-0.509454	3.24139e-06	1.54476e-06
LXLOC_002560	0.735083	0.0476787	0.0136758
LXLOC_018529	-0.37024	0.000302439	0.000120216
LXLOC_020559	-0.359185	0.000142995	5.87561e-05
LXLOC_019301	-0.308097	0.153976	0.0399746
LXLOC_017224	0.288906	3.75631e-08	2.05364e-08
LXLOC_020888	-0.308381	0.0146085	0.00460592
LXLOC_018291	0.895241	0.0680181	0.0189812
LXLOC_001972	0.976452	7.54377e-128	2.33754e-127
LXLOC_001908	-0.421696	0.114956	0.0306007
LXLOC_018128	-1.18504	3.74561e-06	1.77487e-06
LXLOC_006174	-2.29045	7.69416e-06	3.55171e-06
LXLOC_018887	0.684457	0.000501589	0.000194373
LXLOC_016595	-0.927882	0.44429	0.102661
LXLOC_021012	-1.13175	3.14147e-07	1.6115e-07
LXLOC_021244	0.731889	0.128514	0.0338865
LXLOC_013615	-0.561184	4.12337e-06	1.94596e-06
LXLOC_003146	-1.15359	1.46382e-21	1.35219e-21
LXLOC_000438	1.14612	0.00317848	0.00111152
LXLOC_001920	0.0497505	0.844718	0.178198
LXLOC_011207	0.635055	0.0228119	0.00695415
LXLOC_019316	-0.331885	8.61687e-23	8.22035e-23
LXLOC_008208	1.15012	9.57436e-10	5.75219e-10
LXLOC_016374	-1.59085	3.46187e-07	1.77177e-07
LXLOC_006587	0.644437	1.42763e-06	7.00067e-07
LXLOC_003867	-0.893116	0.0177124	0.0055118
LXLOC_010324	-2.35415	6.69726e-07	3.35916e-07
LXLOC_001482	-0.659292	5.69657e-40	7.70216e-40
LXLOC_008726	-0.463305	0.00173421	0.000628827
LXLOC_010553	1.44207	4.96096e-13	3.46923e-13
LXLOC_009592	-0.308486	0.239609	0.0593768
LXLOC_001407	-0.980993	2.86468e-13	2.02352e-13
LXLOC_018621	0.016883	0.936039	0.193706
LXLOC_006267	0.138887	0.342424	0.0816123
LXLOC_020681	-0.138434	0.312325	0.0751952
LXLOC_013982	1.17165	3.28199e-34	4.02912e-34
LXLOC_000214	-1.28543	0.00142768	0.000524319
LXLOC_008698	-0.393545	0.337883	0.0806544
LXLOC_018848	-0.565312	0.353174	0.0838873
LXLOC_014816	0.579078	0.0068937	0.0022933
LXLOC_007371	-0.29029	1.69059e-140	5.64203e-140
LXLOC_017062	-0.0274173	0.942319	0.194709
LXLOC_020490	0.131192	0.272539	0.0666354
LXLOC_021374	-0.571415	6.43324e-06	2.98825e-06
LXLOC_020970	-0.693089	3.77576e-11	2.43326e-11
LXLOC_006217	-0.522063	5.4242e-07	2.74e-07
LXLOC_009024	0.0302982	0.845346	0.178314
LXLOC_018814	-0.396273	6.88021e-43	9.71853e-43
LXLOC_011234	-1.01385	5.9214e-06	2.7594e-06
LXLOC_004456	0.398347	0.0167614	0.00523649
LXLOC_006473	0.0180635	0.9036	0.188515
LXLOC_012829	-0.359221	0.123169	0.0326114
LXLOC_006330	-0.258132	3.0618e-05	1.34356e-05
LXLOC_010561	-0.30156	0.0907775	0.0246852
LXLOC_019102	-0.904239	6.54531e-05	2.78215e-05
LXLOC_019687	0.421009	3.58385e-08	1.96264e-08
LXLOC_009985	-2.09781	0.00273948	0.000965732
LXLOC_004345	-1.71078	2.73388e-11	1.77303e-11
LXLOC_005203	-0.817178	1.16562e-05	5.3003e-06
LXLOC_013422	-2.45144	0.000197847	8.01712e-05
LXLOC_017942	1.65708	0.0325069	0.00964121
LXLOC_020214	-0.459019	9.46114e-06	4.33102e-06
LXLOC_020759	-0.275412	0	0
LXLOC_005745	-0.336687	0.177264	0.0453877
LXLOC_003862	-0.487309	0.104703	0.0280945
LXLOC_013855	1.80908	0.00333372	0.00116257
LXLOC_021439	-0.594335	0.00151026	0.000553236
LXLOC_005915	-0.319307	0.0376394	0.0110121
LXLOC_002759	0.563971	0.0031802	0.00111205
LXLOC_019599	0.693943	0.0130908	0.00414988
LXLOC_013113	-0.512844	0.0950553	0.0257327
LXLOC_003733	0.191213	0.0789846	0.0217697
LXLOC_019775	-0.966088	1.08803e-102	2.84097e-102
LXLOC_002293	1.71982	1.39797e-05	6.3168e-06
LXLOC_007812	-2.24981	1.04822e-11	6.93315e-12
LXLOC_020128	0.275942	0.548647	0.123368
LXLOC_020431	0.749641	0.134276	0.0352982
LXLOC_008875	-0.24104	0.0579588	0.0163728
LXLOC_016838	-0.650616	3.92763e-06	1.85788e-06
LXLOC_001160	-0.154157	0.56722	0.127031
LXLOC_017888	-2.24981	0.00428402	0.00147161
LXLOC_012067	0.361625	0.576044	0.128783
LXLOC_003523	-0.413308	0.0878025	0.0239515
LXLOC_012596	-1.16151	1.41424e-06	6.9371e-07
LXLOC_019606	0.318681	0.259356	0.0637881
LXLOC_003703	-0.0107894	0.922036	0.191448
LXLOC_010233	-3.38731	0.00249456	0.000884358
LXLOC_016433	-0.512844	0.0166962	0.00521714
LXLOC_020489	-0.0717186	0.00997718	0.00323338
LXLOC_017603	-1.30515	1.6524e-27	1.77022e-27
LXLOC_017941	-0.676343	0.059119	0.0166717
LXLOC_003485	-0.0831599	0.578509	0.129204
LXLOC_001611	5.01416	4.26763e-05	1.84834e-05
LXLOC_019028	1.39405	2.55764e-05	1.12931e-05
LXLOC_017300	-0.631332	1.71314e-11	1.12249e-11
LXLOC_005900	0.232583	0.0403	0.0117372
LXLOC_006098	0.702923	1.52841e-05	6.87572e-06
LXLOC_001394	0.0513932	0.508166	0.115598
LXLOC_017708	-1.38731	0.0798558	0.0219617
LXLOC_013581	-1.27184	0.00454796	0.00155772
LXLOC_008648	-0.644756	9.25494e-07	4.59587e-07
LXLOC_001612	-0.845025	1.07807e-12	7.43392e-13
LXLOC_001415	-0.878877	2.93472e-31	3.39908e-31
LXLOC_012962	-0.103324	0.573874	0.128386
LXLOC_021715	-0.927882	0.00358075	0.00124314
LXLOC_002786	-0.48948	9.42904e-12	6.25008e-12
LXLOC_009567	0.612687	0.27398	0.0669509
LXLOC_009662	0.0721184	0.936992	0.193805
LXLOC_019579	0.185647	0.0860845	0.0235175
LXLOC_019694	-0.00241729	0.976785	0.200308
LXLOC_019738	-0.53037	0.00816713	0.00268248
LXLOC_015266	-0.807972	8.12014e-17	6.44849e-17
LXLOC_014869	0.0721184	0.841492	0.177616
LXLOC_000783	0.234848	0.332406	0.0794632
LXLOC_004793	0.285835	0.0180452	0.00561107
LXLOC_008679	1.91819	0.000387712	0.000152232
LXLOC_014866	-0.379514	0.0378214	0.011062
LXLOC_019746	-3.07763	1.76947e-13	1.25953e-13
LXLOC_012414	-0.688559	5.82789e-13	4.06329e-13
LXLOC_010466	2.75019	1.62832e-06	7.95769e-07
LXLOC_019488	-2.69342	1.86492e-06	9.0624e-07
LXLOC_019679	0.14996	0.49222	0.112352
LXLOC_015284	-0.361778	0.148884	0.0388009
LXLOC_002234	-1.29245	3.85553e-07	1.96626e-07
LXLOC_004222	0.730561	4.76761e-08	2.59119e-08
LXLOC_017463	-0.56268	0.00696164	0.00231417
LXLOC_015988	1.78261	9.69292e-05	4.04734e-05
LXLOC_021745	0.516591	0.00851045	0.00278701
LXLOC_019355	-0.816742	2.84926e-17	2.29887e-17
LXLOC_012166	-0.150274	0.515932	0.117076
LXLOC_011699	-0.275805	0.340815	0.0812909
LXLOC_019834	-0.334388	1.05285e-05	4.79988e-06
LXLOC_019072	0.323657	0.447579	0.103328
LXLOC_019313	-0.199155	0.000168964	6.89524e-05
LXLOC_010597	1.2228	2.18707e-14	1.60581e-14
LXLOC_017747	0.317231	0.399169	0.0934923
LXLOC_014140	0.657081	0.259637	0.0638477
LXLOC_017910	-0.878972	0.0490938	0.0140526
LXLOC_004334	-0.617094	4.36753e-08	2.37903e-08
LXLOC_004180	1.78153	9.09095e-13	6.2882e-13
LXLOC_011845	-0.579958	0.399695	0.0935618
LXLOC_014053	-0.244141	0.201676	0.0509218
LXLOC_018017	-0.449542	8.88034e-05	3.72679e-05
LXLOC_000957	-0.0269861	0.789723	0.168179
LXLOC_009708	-0.149102	1.98577e-08	1.10603e-08
LXLOC_018039	-0.222144	0.221702	0.0553899
LXLOC_013721	0.105285	0.496011	0.113138
LXLOC_006456	-0.417473	0.00262948	0.000929074
LXLOC_019060	-0.250323	0.286451	0.0695789
LXLOC_005238	-2.38731	0.0112606	0.0036196
LXLOC_021696	0.326538	7.9623e-13	5.52312e-13
LXLOC_018304	1.47288	9.82115e-56	1.65517e-55
LXLOC_010438	-0.495566	0.0448732	0.012949
LXLOC_016112	-0.416509	0.00140783	0.000517493
LXLOC_004102	-0.998271	5.04105e-06	2.36106e-06
LXLOC_013941	0.763168	0.000122093	5.04641e-05
LXLOC_009656	-4.62832	0.000291565	0.000116025
LXLOC_009653	-0.910799	6.64182e-16	5.12891e-16
LXLOC_020925	-0.458396	0.295951	0.0716087
LXLOC_007705	0.7991	0.0167247	0.00522569
LXLOC_018111	-0.675695	0.00605074	0.00203514
LXLOC_003500	-0.120527	0.69218	0.150674
LXLOC_013169	-0.0309751	0.857463	0.180466
LXLOC_003216	-0.50286	0.00104065	0.000389307
LXLOC_008462	-0.496724	0.00324308	0.00113258
LXLOC_016523	0.0255758	0.843494	0.177962
LXLOC_005768	-0.342919	0.531484	0.120032
LXLOC_020606	-1.34292	0.011612	0.00372276
LXLOC_007900	0.633622	0.000137729	5.66926e-05
LXLOC_006792	0.553917	2.36105e-08	1.30806e-08
LXLOC_005191	-0.877256	0.00633484	0.0021234
LXLOC_021534	0.10454	0.628784	0.138762
LXLOC_013807	-0.0594298	0.797157	0.169435
LXLOC_005564	0.400686	4.45925e-33	5.35093e-33
LXLOC_014934	-0.0330364	0.73842	0.158958
LXLOC_008533	3.65708	0.0183068	0.00568159
LXLOC_019367	-1.15027	0.00695266	0.0023115
LXLOC_005105	0.799895	5.22927e-18	4.32607e-18
LXLOC_019268	-0.190916	0.826628	0.174863
LXLOC_013796	0.214573	0.703864	0.15281
LXLOC_007177	-0.368454	0.46574	0.106966
LXLOC_016890	0.459141	0.3855	0.0906247
LXLOC_018165	-0.388266	2.22111e-15	1.68384e-15
LXLOC_003180	0.394046	0.682913	0.148941
LXLOC_012177	3.50952	3.01878e-27	3.21853e-27
LXLOC_004123	-0.180915	0.197996	0.0500934
LXLOC_021707	-0.515448	0.000363982	0.000143305
LXLOC_021706	-0.000394138	0.998463	0.20396
LXLOC_010173	-0.0173798	0.922932	0.191617
LXLOC_020460	0.15969	0.176126	0.0451174
LXLOC_006293	-0.585613	5.57941e-30	6.3129e-30
LXLOC_003953	-0.303134	5.74505e-06	2.68003e-06
LXLOC_015809	-0.296807	0.0566599	0.0160318
LXLOC_008765	-0.322161	0.157149	0.0407358
LXLOC_010738	-2.83477	0.00114517	0.000426096
LXLOC_005161	-1.46845	0.00182096	0.000657798
LXLOC_013820	-2.31149	0.00035441	0.000139705
LXLOC_010178	0.318414	0.229277	0.0570582
LXLOC_020348	0.269813	0.0570813	0.0161454
LXLOC_006237	-1.54937	0.000286856	0.000114263
LXLOC_003751	-0.90322	5.64538e-05	2.41577e-05
LXLOC_012114	-0.866205	5.18764e-14	3.75431e-14
LXLOC_002371	-0.518119	0.00727928	0.00241239
LXLOC_002737	-1.92788	0.181381	0.0462917
LXLOC_020571	-0.667685	0	0
LXLOC_005169	-0.354146	0.290355	0.0704265
LXLOC_004115	-1.04336	0.0315896	0.00938742
LXLOC_008467	1.84973	0.00109668	0.000409018
LXLOC_018971	-0.20779	0.532983	0.120266
LXLOC_013725	0.235417	0.0678193	0.0189311
LXLOC_020427	0.96511	7.11102e-08	3.81696e-08
LXLOC_003001	0.0387089	0.586772	0.130829
LXLOC_015306	0.604132	0.0052125	0.00176802
LXLOC_005903	0.31662	0.00367851	0.00127482
LXLOC_010723	-0.125255	0.0391007	0.0114131
LXLOC_006675	-0.44573	0.00603166	0.00202962
LXLOC_017946	-0.208618	0.212231	0.0532633
LXLOC_021458	0.835328	0.0173135	0.00539762
LXLOC_006373	-0.590847	0.260387	0.0640063
LXLOC_004133	-0.114814	0.193169	0.0489505
LXLOC_005206	-0.943041	5.08982e-11	3.26036e-11
LXLOC_013886	-4.28543	0.00157338	0.000574854
LXLOC_020465	5.76533	8.33413e-08	4.45882e-08
LXLOC_020006	1.01965	0.000134886	5.55547e-05
LXLOC_020475	-0.584301	2.22525e-32	2.64237e-32
LXLOC_018625	1.48716	0.00125035	0.00046312
LXLOC_009533	-0.124918	0.684949	0.149312
LXLOC_013857	-2.66485	0.000277223	0.000110552
LXLOC_019911	0.431521	0.00551072	0.00186388
LXLOC_016223	-0.907385	4.76929e-21	4.34574e-21
LXLOC_019292	-0.0104174	0.891229	0.186459
LXLOC_013791	0.0583986	0.326966	0.0783004
LXLOC_003418	2.82701	7.91528e-06	3.65033e-06
LXLOC_008132	-0.0376699	0.688644	0.150004
LXLOC_019802	-0.553816	0.00646368	0.00216147
LXLOC_014072	-2.01534	0.00455438	0.00155905
LXLOC_006338	-0.200005	0.0937991	0.0254306
LXLOC_005481	-0.803246	0.0265125	0.00797548
LXLOC_020522	-4.24981	0.00183801	0.000663076
LXLOC_018658	-1.9397	4.71655e-05	2.03485e-05
LXLOC_021543	-0.284762	0.172467	0.0442799
LXLOC_019424	-3.29712	5.18912e-07	2.62504e-07
LXLOC_001874	-0.598313	8.65121e-05	3.63468e-05
LXLOC_012548	2.73508	0.000229618	9.23801e-05
LXLOC_019413	-1.2009	0.000323401	0.000127997
LXLOC_020495	-0.223277	0.731235	0.157731
LXLOC_017164	-0.927882	0.226463	0.0564266
LXLOC_015714	-1.05269	6.50518e-16	5.02657e-16
LXLOC_013761	-0.286635	2.77892e-48	4.24497e-48
LXLOC_010647	-0.782684	0.00228606	0.000814569
LXLOC_002078	-2.53454	9.57106e-11	6.04469e-11
LXLOC_000272	-0.20799	0.326625	0.0782342
LXLOC_017215	-2.00423	1.45525e-11	9.56078e-12
LXLOC_019437	-0.422497	0.208408	0.0524376
LXLOC_005185	-0.567706	0.00393425	0.00135778
LXLOC_015921	-1.68277	0.00156476	0.000571961
LXLOC_020373	-0.236288	0.366287	0.0866487
LXLOC_005673	1.07901	0.000218704	8.81705e-05
LXLOC_010389	1.0704	2.41132e-08	1.33518e-08
LXLOC_012077	3.07212	0.0113178	0.00363609
LXLOC_015772	-1.52879	6.05786e-08	3.27066e-08
LXLOC_019542	-0.0874297	0.229927	0.0572053
LXLOC_017922	0.487156	0.441393	0.102107
LXLOC_014786	-0.583511	3.78627e-33	4.55118e-33
LXLOC_004875	-1.31721	3.29373e-15	2.47933e-15
LXLOC_021668	-0.112371	0.301881	0.0729173
LXLOC_014849	1.84822	6.43019e-15	4.80409e-15
LXLOC_008277	-1.38509	1.90035e-11	1.242e-11
LXLOC_017890	-0.397011	0.00608072	0.00204396
LXLOC_018221	0.0102435	0.932925	0.193184
LXLOC_016913	0.394046	0.479238	0.109747
LXLOC_017868	1.056	3.82079e-05	1.66217e-05
LXLOC_012649	-1.23454	5.33949e-16	4.13639e-16
LXLOC_020710	-0.113672	0.297482	0.0719555
LXLOC_016725	1.22412	0.0279515	0.00838519
LXLOC_019048	-0.814225	0.000156243	6.39637e-05
LXLOC_007700	0.487156	0.239613	0.0593768
LXLOC_013988	0.00196576	0.984146	0.201557
LXLOC_016875	-0.387621	0.125729	0.033235
LXLOC_013773	1.07212	0.125788	0.0332418
LXLOC_000965	0.335206	0.000537827	0.000207725
LXLOC_020763	-0.162159	0.0779086	0.021495
LXLOC_020862	-0.744584	1.04444e-07	5.54899e-08
LXLOC_007764	-0.852763	2.08135e-08	1.15821e-08
LXLOC_000844	0.669359	0.0230523	0.0070213
LXLOC_019965	-0.556283	4.19777e-06	1.97973e-06
LXLOC_020042	-2.57174	6.70208e-05	2.84657e-05
LXLOC_007907	0.0798754	0.759033	0.162431
LXLOC_016404	1.70217	3.94022e-07	2.00777e-07
LXLOC_021630	0.518816	1.5059e-14	1.11068e-14
LXLOC_021602	1.33515	0.00160465	0.000585564
LXLOC_020484	-1.09781	0.187438	0.0476686
LXLOC_002383	-0.757957	0.0687227	0.019156
LXLOC_004969	-0.705489	0.295109	0.0714325
LXLOC_002040	0.475386	0.479668	0.109814
LXLOC_019557	0.512691	0.0787501	0.0217125
LXLOC_020847	-0.467958	0.403672	0.0944015
LXLOC_017074	0.194016	0.00056746	0.000218566
LXLOC_018963	4.62793	0.0004113	0.000160887
LXLOC_020336	-0.289404	0.0018353	0.000662634
LXLOC_009576	0.998118	0.0692853	0.0192919
LXLOC_000450	-0.26271	5.94517e-11	3.79338e-11
LXLOC_012437	0.657081	0.130441	0.0343603
LXLOC_012585	-0.764746	1.08901e-14	8.0721e-15
LXLOC_000002	0.04169	0	0
LXLOC_007021	-0.753852	0.0454971	0.013095
LXLOC_011415	-0.290282	0.0624324	0.0175203
LXLOC_001977	0.920115	0.242719	0.0600402
LXLOC_013814	2.07212	0.150858	0.039238
LXLOC_021564	0.345137	0.0332858	0.00985619
LXLOC_013195	1.71982	1.39797e-05	6.3168e-06
LXLOC_016034	-0.729903	0.0335951	0.00994294
LXLOC_014034	-3.51284	0.023433	0.00711866
LXLOC_013601	0.743496	0.0333805	0.00988303
LXLOC_015861	0.03259	0.923113	0.191631
LXLOC_009451	-0.827355	1.34023e-06	6.58528e-07
LXLOC_009107	0.946587	0.061425	0.0172687
LXLOC_020041	-0.000172105	0.99903	0.204034
LXLOC_009277	0.434688	0.548285	0.123304
LXLOC_005885	0.355911	0.213883	0.0536252
LXLOC_011980	-0.502315	0.0591483	0.016679
LXLOC_002025	1.57691	1.04189e-09	6.24502e-10
LXLOC_020876	-0.455972	0.507235	0.115402
LXLOC_003967	-1.51284	0.00577017	0.00194759
LXLOC_010673	-0.268919	0.278685	0.0679412
LXLOC_018532	-0.784236	6.15651e-15	4.60173e-15
LXLOC_018922	-0.0556319	0.0146895	0.00463057
LXLOC_010874	-0.785863	0.0737847	0.020439
LXLOC_014894	-0.171807	0.588103	0.131042
LXLOC_016013	-0.0947712	0.275655	0.0673132
LXLOC_020811	-1.2157	1.4805e-05	6.66695e-06
LXLOC_011330	-1.92788	0.181381	0.0462917
LXLOC_019069	-1.34482	1.92692e-08	1.07374e-08
LXLOC_020884	-0.00923214	0.851893	0.179433
LXLOC_004135	-1.48247	0.000141482	5.81738e-05
LXLOC_004110	1.01965	0.0275275	0.00826558
LXLOC_003264	-1.41331	0.045074	0.0129992
LXLOC_018874	-0.474233	6.01639e-17	4.79885e-17
LXLOC_014747	-0.633757	1.39806e-17	1.14078e-17
LXLOC_004203	0.360646	0.000194251	7.87988e-05
LXLOC_007664	0.45063	0.196375	0.0497168
LXLOC_010292	-0.445296	4.26684e-18	3.54004e-18
LXLOC_014801	0.408546	0.00281503	0.000990439
LXLOC_013775	0.741607	0.000831782	0.000314607
LXLOC_015636	-1.54563	6.64642e-08	3.57738e-08
LXLOC_021180	-0.0914336	0.431809	0.10015
LXLOC_017427	-0.571738	0.21006	0.0527963
LXLOC_014896	0.419697	0.0325849	0.00966095
LXLOC_019874	0.621457	0.031915	0.00948009
LXLOC_014069	-0.120527	0.779521	0.166236
LXLOC_015665	-0.851933	1.49888e-05	6.74659e-06
LXLOC_003942	-3.27838	1.06474e-19	9.29367e-20
LXLOC_008509	0.0721184	0.791351	0.168449
LXLOC_013745	-0.0492284	0.403091	0.0942755
LXLOC_017217	-1.06146	2.17635e-07	1.12991e-07
LXLOC_003988	-5.14289	6.3759e-61	1.143e-60
LXLOC_004644	-0.555913	0.0135706	0.00429419
LXLOC_000980	0.280077	0.348745	0.0829642
LXLOC_013505	-0.382448	0.136071	0.0357125
LXLOC_011637	-0.647774	0.0359423	0.0105712
LXLOC_015283	-1.02742	0.0226069	0.00689636
LXLOC_009758	-1.22905	6.48619e-05	2.75846e-05
LXLOC_020221	-0.861041	0.00455607	0.00155952
LXLOC_016330	-0.101649	0.565878	0.126782
LXLOC_010123	-1.42538	1.28218e-07	6.77024e-08
LXLOC_002368	-0.0452386	0.861993	0.181308
LXLOC_019824	-1.66769	1.22587e-06	6.03911e-07
LXLOC_008528	-0.688875	1.03438e-05	4.71918e-06
LXLOC_011015	-0.501162	1.92913e-05	8.60645e-06
LXLOC_005499	-2.04336	0.000400117	0.000156725
LXLOC_001988	2.07212	0.00043365	0.000169157
LXLOC_014147	-0.839526	1.27414e-06	6.27124e-07
LXLOC_013596	1.48716	0.0224934	0.00686688
LXLOC_021511	-0.579717	5.4022e-286	3.23329e-285
LXLOC_005282	-1.54795	2.01902e-05	8.99927e-06
LXLOC_000960	-0.0607388	0.591055	0.131544
LXLOC_019568	-0.300484	0.0237833	0.00721387
LXLOC_019501	0.199054	0.00946923	0.00307875
LXLOC_003747	-0.0798847	0.903996	0.188559
LXLOC_004393	0.531579	0.0581184	0.0164122
LXLOC_014555	-0.653022	0.0110588	0.00356129
LXLOC_017762	-0.625304	4.62535e-44	6.66813e-44
LXLOC_020313	-1.63838	0.000340007	0.000134264
LXLOC_018591	-0.115147	0.0159291	0.00499395
LXLOC_017083	-0.19637	0.503534	0.11471
LXLOC_019506	0.321386	9.11085e-06	4.17613e-06
LXLOC_010470	-0.60414	2.6379e-06	1.26889e-06
LXLOC_004359	0.162316	0.652713	0.143332
LXLOC_014973	-3.83477	0.000216042	8.71114e-05
LXLOC_011224	-0.135516	0.025085	0.00757773
LXLOC_005554	-0.422646	0.289705	0.0702849
LXLOC_017475	-0.649166	0.00192264	0.000691722
LXLOC_009255	0.782612	1.57948e-05	7.0957e-06
LXLOC_015100	0.413967	0.00323616	0.00113032
LXLOC_014427	-0.108668	0.273444	0.0668333
LXLOC_020513	-1.04036	6.63524e-42	9.21563e-42
LXLOC_017362	1.03679	2.24515e-06	1.08594e-06
LXLOC_020371	-0.290452	0.57052	0.127711
LXLOC_018124	-0.728979	1.78511e-06	8.69615e-07
LXLOC_001756	-0.707364	6.09727e-36	7.71351e-36
LXLOC_015209	-1.38731	1.48369e-07	7.79474e-08
LXLOC_017862	1.11276	0.000111168	4.6155e-05
LXLOC_008567	-0.16889	0.774651	0.165376
LXLOC_010114	-0.342919	0.484177	0.110738
LXLOC_003185	-0.871787	4.57168e-08	2.48719e-08
LXLOC_018467	0.0863568	0.258891	0.0636867
LXLOC_019026	-0.145385	0.236072	0.0586032
LXLOC_020706	-0.548293	0.000531318	0.000205356
LXLOC_007586	-2.19092	0.000378453	0.000148811
LXLOC_005079	-3.92788	0.00646871	0.00216147
LXLOC_009020	0.175212	0.431316	0.100053
LXLOC_019625	0.245647	0.003654	0.0012666
LXLOC_001892	-3.57174	3.22623e-06	1.53799e-06
LXLOC_019170	0.164041	0.476287	0.109153
LXLOC_006379	-0.325217	0.0582094	0.016437
LXLOC_003533	-0.488597	0.0182322	0.00566598
LXLOC_001326	-0.442455	0.160666	0.0415792
LXLOC_008421	1.03364	0.00907847	0.00295976
LXLOC_018446	-0.58923	0.000119909	4.96242e-05
LXLOC_016953	-0.223338	0.349194	0.0830394
LXLOC_018028	0.541022	1.90777e-07	9.93846e-08
LXLOC_011288	-1.41821	3.71318e-05	1.61635e-05
LXLOC_011389	3.24204	0.00591073	0.00199215
LXLOC_005700	-3.62832	1.78616e-06	8.69864e-07
LXLOC_010455	-0.837427	1.00838e-10	6.35947e-11
LXLOC_017371	0.335153	0.441888	0.102202
LXLOC_007478	0.519577	0.361321	0.0855982
LXLOC_011222	-0.213615	9.36093e-05	3.91539e-05
LXLOC_004938	2.87947	0.00116633	0.000433409
LXLOC_000775	0.154581	0.40174	0.0940108
LXLOC_007883	-0.372184	4.66492e-05	2.01364e-05
LXLOC_004880	-1.23274	6.2865e-08	3.38924e-08
LXLOC_009079	0.843787	1.06116e-19	9.26403e-20
LXLOC_006708	0.616439	0.103776	0.0278763
LXLOC_020919	-1.35811	1.80314e-05	8.06128e-06
LXLOC_016917	-1.23044	3.46898e-05	1.51396e-05
LXLOC_013256	-0.00145455	0.990504	0.202707
LXLOC_015129	-0.279194	0.0233665	0.0071108
LXLOC_007870	0.0870123	0.167906	0.0432245
LXLOC_011459	-0.927882	0.0155614	0.00488782
LXLOC_004147	-1.24981	0.123373	0.0326513
LXLOC_003717	-1.05126	0.000923244	0.00034767
LXLOC_019415	-0.979772	3.22979e-08	1.77364e-08
LXLOC_000916	1.005	0.0066033	0.00220298
LXLOC_013577	0.809084	0.0809259	0.0222235
LXLOC_006042	-2.51284	0.0538691	0.0152978
LXLOC_000065	-0.434842	0.310359	0.0747586
LXLOC_014340	0.126566	0.749454	0.160853
LXLOC_007636	0.598187	0.00540467	0.00182927
LXLOC_001393	-1.60188	0	0
LXLOC_000445	-2.42358	5.47134e-20	4.82819e-20
LXLOC_021299	0.0550722	0.059214	0.0166919
LXLOC_017194	0.679801	0.0897554	0.0244262
LXLOC_018923	2.91296	0.0459296	0.0132079
LXLOC_012444	-0.0699006	0.849996	0.179118
LXLOC_011523	1.15603	1.99532e-55	3.35006e-55
LXLOC_018940	-0.768696	0.0073515	0.00243369
LXLOC_014621	-0.0175148	0.908969	0.189369
LXLOC_005734	-0.20799	0.423173	0.0984409
LXLOC_019554	3.53155	0.00161731	0.000589668
LXLOC_010033	-0.1136	0.0576655	0.0163022
[truncated: 6,659 more rows]

## Sheet: mRNA
GeneID	log2Ratio_Control-VS-Treated	Pvalue_Control-VS-Treated	FDR_Control-VS-Treated
MXLOC_005703	-0.158337	0.000399422	0.000156537
MXLOC_014567	0.0104355	0.980966	0.201015
MXLOC_018798	-0.406851	4.1055e-73	8.38894e-73
MXLOC_012035	-0.371242	1.00769e-165	3.86334e-165
MXLOC_003429	-0.0352746	0.826243	0.174812
MXLOC_002893	-0.351415	1.07623e-24	1.07928e-24
MXLOC_015884	-0.0145067	0.874825	0.183615
MXLOC_019664	-1.51911	1.72566e-21	1.59197e-21
MXLOC_008273	-0.992837	3.34652e-07	1.71417e-07
MXLOC_014315	0.883239	8.46503e-41	1.15732e-40
MXLOC_004576	-0.110086	5.83665e-06	2.7212e-06
MXLOC_000455	-0.152588	0.463146	0.106455
MXLOC_011583	-0.786794	2.74594e-192	1.18865e-191
MXLOC_007880	-1.00127	3.61978e-40	4.91046e-40
MXLOC_021788	-0.153917	5.20981e-10	3.17126e-10
MXLOC_006261	-0.405438	1.57671e-236	8.02427e-236
MXLOC_011752	-0.56665	0.000401563	0.000157267
MXLOC_009652	-0.242637	6.73901e-37	8.65962e-37
MXLOC_001651	0.179284	0.276104	0.0673693
MXLOC_002937	0.196176	0.000691218	0.000263231
MXLOC_016509	0.137739	0.157982	0.0409364
MXLOC_015559	0.493552	1.6794e-13	1.19646e-13
MXLOC_014662	-0.639216	9.72784e-13	6.71829e-13
MXLOC_011122	-2.10499	3.47767e-13	2.45051e-13
MXLOC_006728	0.122599	1.43135e-33	1.73542e-33
MXLOC_005919	0.454156	9.21538e-99	2.34985e-98
MXLOC_011365	-5.90836	7.7841e-09	4.44843e-09
MXLOC_001917	0.190303	0	0
MXLOC_006353	0.0642503	0.345625	0.0823259
MXLOC_014024	0.900784	1.62489e-12	1.1123e-12
MXLOC_009933	1.42128	0	0
MXLOC_007889	1.28201	7.06254e-30	7.9689e-30
MXLOC_010520	-0.178522	1.41163e-06	6.92499e-07
MXLOC_008678	-0.409214	8.67903e-16	6.6789e-16
MXLOC_006202	0.0787171	0.377737	0.0889876
MXLOC_010156	-0.127161	0.0104928	0.00339037
MXLOC_010005	-0.219116	1.68325e-20	1.50574e-20
MXLOC_015972	0.320099	0.0168007	0.0052471
MXLOC_018101	-0.203953	2.15154e-26	2.24837e-26
MXLOC_012471	-0.622318	0.0549301	0.0155829
MXLOC_007520	0.270234	1.02125e-23	9.99174e-24
MXLOC_018118	1.03642	8.16892e-66	1.55316e-65
MXLOC_013082	-1.55328	2.12263e-193	9.24563e-193
MXLOC_007683	1.02519	1.64262e-108	4.48022e-108
MXLOC_000259	3.3683	0	0
MXLOC_005541	-0.0346352	4.88858e-05	2.10665e-05
MXLOC_005827	-0.540272	1.95053e-07	1.01537e-07
MXLOC_002132	-0.000307466	0.995982	0.203564
MXLOC_007680	0.038166	0.877402	0.184061
MXLOC_014808	0.924073	8.1293e-223	3.90194e-222
MXLOC_007532	2.85481	0	0
MXLOC_002396	1.15773	0.002673	0.000943585
MXLOC_008158	-0.566291	3.28043e-06	1.56261e-06
MXLOC_016405	-0.132502	2.64358e-13	1.86815e-13
MXLOC_007392	0.22356	0.0820568	0.0225088
MXLOC_011957	-0.113773	0.00016939	6.91204e-05
MXLOC_009668	-0.0630986	0.224168	0.0559515
MXLOC_009822	0.610559	0.00360756	0.00125209
MXLOC_001112	0.117076	8.33887e-07	4.15192e-07
MXLOC_010468	-0.256265	0.000582799	0.000224174
MXLOC_010482	-0.298883	2.37284e-24	2.35831e-24
MXLOC_011264	0.398619	0.100743	0.0271074
MXLOC_001789	-0.221354	0.000502771	0.000194815
MXLOC_011717	0.600805	3.51188e-73	7.18196e-73
MXLOC_003526	-0.310925	4.61418e-10	2.81815e-10
MXLOC_002869	-0.292714	4.9065e-28	5.32982e-28
MXLOC_015704	-0.66628	3.62367e-47	5.44535e-47
MXLOC_006944	0.774581	0	0
MXLOC_021529	-0.135934	0.310528	0.0747919
MXLOC_008647	-0.282042	3.07018e-33	3.6986e-33
MXLOC_002081	1.00718	0	0
MXLOC_013234	-0.0163425	0.772563	0.164974
MXLOC_001079	-0.118022	0.589521	0.131245
MXLOC_011848	0.101193	0.408717	0.0953818
MXLOC_016461	-0.0712768	0.158536	0.0410713
MXLOC_007474	-0.124299	1.19468e-07	6.32253e-08
MXLOC_014135	-0.726174	4.8656e-11	3.11878e-11
MXLOC_011013	-0.448897	0.000228148	9.17961e-05
MXLOC_010510	0.268322	0.0935721	0.0253719
MXLOC_011820	0.0967303	0.0467613	0.0134328
MXLOC_021166	0.54234	1.85148e-14	1.36165e-14
MXLOC_010471	-0.270225	1.08258e-72	2.20288e-72
MXLOC_013272	-0.57699	7.64144e-08	4.09448e-08
MXLOC_012286	-0.368701	8.97455e-53	1.45586e-52
MXLOC_004939	-0.241955	4.69888e-09	2.71927e-09
MXLOC_007572	-1.11136	6.30455e-24	6.2005e-24
MXLOC_021493	-0.648405	0.357442	0.0847653
MXLOC_012815	-0.343139	1.32542e-41	1.82996e-41
MXLOC_000728	-0.0332638	0.78691	0.16765
MXLOC_013498	-0.947075	4.56278e-09	2.64394e-09
MXLOC_019543	-0.456427	1.58251e-10	9.88609e-11
MXLOC_021093	0.0748841	0.43158	0.100102
MXLOC_007173	-1.14412	1.60104e-29	1.79287e-29
MXLOC_015541	0.101008	2.25071e-15	1.70601e-15
MXLOC_002582	-0.753428	0.0511748	0.014603
MXLOC_011409	-0.336242	6.97309e-34	8.49656e-34
MXLOC_001224	-0.226045	0.00185874	0.000670109
MXLOC_010355	-0.587565	2.57063e-182	1.06386e-181
MXLOC_011759	-0.348758	9.91728e-138	3.26081e-137
MXLOC_015978	-1.45327	2.09481e-70	4.16567e-70
MXLOC_006422	-2.02858	6.06421e-12	4.0515e-12
MXLOC_007441	-1.84596	4.29741e-11	2.76108e-11
MXLOC_019227	-0.0163947	0.755655	0.161822
MXLOC_008888	-0.32679	8.06489e-11	5.11854e-11
MXLOC_007120	0.70368	1.52536e-28	1.67442e-28
MXLOC_020943	0.00817611	0.926113	0.192034
MXLOC_021720	0.56409	0.000457927	0.000178172
MXLOC_002870	0.487677	0.339189	0.0809308
MXLOC_007317	-0.421968	0.00455296	0.001559
MXLOC_019890	-0.262271	5.7621e-17	4.59826e-17
MXLOC_007200	0.6947	3.30961e-21	3.0264e-21
MXLOC_015493	6.44263	1.63618e-11	1.07336e-11
MXLOC_001007	-1.4956	7.25999e-19	6.16652e-19
MXLOC_000499	-0.0215355	0.556288	0.124897
MXLOC_000650	-0.409174	0.000147517	6.05533e-05
MXLOC_021179	-0.234779	2.28841e-05	1.01492e-05
MXLOC_010214	-0.221983	1.60702e-06	7.85908e-07
MXLOC_001634	-0.119393	3.18627e-06	1.52027e-06
MXLOC_009440	0.223624	0.021058	0.00646618
MXLOC_009634	2.19263	9.66767e-32	1.13342e-31
MXLOC_007954	-0.118472	0.510302	0.115992
MXLOC_007001	0.37358	1.53057e-09	9.10392e-10
MXLOC_009613	2.48041	0.00888029	0.00289863
MXLOC_006891	-1.99281	2.42596e-30	2.7602e-30
MXLOC_004813	-0.447207	2.19834e-13	1.55869e-13
MXLOC_010999	-0.237503	0.475967	0.10909
MXLOC_018803	-0.0310825	0.00631583	0.00211761
MXLOC_001902	-0.0967135	0.000144218	5.9234e-05
MXLOC_006157	-0.0834753	0.00126698	0.00046903
MXLOC_005961	0.197756	5.48782e-15	4.10567e-15
MXLOC_016427	-0.387319	0.00198988	0.000714442
MXLOC_012560	-0.768291	1.77682e-05	7.94652e-06
MXLOC_006116	0.0502584	0.0725288	0.0201195
MXLOC_012092	-0.143544	0.000420929	0.000164522
MXLOC_009124	-1.13939	2.16336e-05	9.62161e-06
MXLOC_001027	1.28066	0	0
MXLOC_011378	0.749112	0.0234612	0.00712634
MXLOC_007847	0.713437	1.9605e-08	1.09221e-08
MXLOC_013723	0.406928	0.0885919	0.0241351
MXLOC_006701	-0.682989	3.76596e-05	1.63919e-05
MXLOC_006244	0.0249656	0.461257	0.106066
MXLOC_017640	-0.185787	0.207486	0.0522379
MXLOC_007381	-1.02277	0.00178945	0.000647562
MXLOC_004050	-0.0958328	4.52722e-05	1.9561e-05
MXLOC_006785	1.31675	0	0
MXLOC_016593	0.413352	2.40531e-05	1.06484e-05
MXLOC_011749	-1.43191	3.99351e-15	3.00009e-15
MXLOC_008381	-1.93547	2.41558e-14	1.76882e-14
MXLOC_005003	0.535492	5.97071e-64	1.1102e-63
MXLOC_013057	-0.895827	2.99706e-284	1.78941e-283
MXLOC_006611	-0.627583	2.04071e-68	3.9948e-68
MXLOC_019776	-0.124759	0.000466706	0.000181487
MXLOC_004590	-0.530468	1.44642e-60	2.5807e-60
MXLOC_012418	-0.107031	0.0204957	0.00630417
MXLOC_016442	-0.642018	2.59477e-89	6.08702e-89
MXLOC_014798	0.174819	2.0041e-06	9.7233e-07
MXLOC_008377	-0.567116	1.85771e-06	9.03182e-07
MXLOC_007141	-0.119005	2.0206e-25	2.06396e-25
MXLOC_010961	-1.15553	3.59949e-24	3.56155e-24
MXLOC_015139	1.57534	7.62707e-10	4.60658e-10
MXLOC_016012	-0.602783	1.30428e-17	1.06568e-17
MXLOC_020893	-0.325454	0.00255058	0.000902517
MXLOC_019807	-0.142344	0.0729185	0.020215
MXLOC_015536	-2.98895	5.35589e-08	2.90287e-08
MXLOC_002337	-2.5023	1.10918e-19	9.66774e-20
MXLOC_009173	0.14757	0.00014066	5.78502e-05
MXLOC_000245	-0.382323	6.63589e-16	5.12514e-16
MXLOC_001718	0.98788	2.62729e-15	1.98592e-15
MXLOC_018014	-0.205522	0.241949	0.0598799
MXLOC_021098	-0.0489947	0.382677	0.0900388
MXLOC_010682	0.207902	1.42144e-14	1.04917e-14
MXLOC_014015	-0.438288	8.72649e-08	4.66465e-08
MXLOC_014823	-0.297016	0.107236	0.0287189
MXLOC_010252	-1.60249	2.03292e-07	1.05746e-07
MXLOC_017203	-0.389877	0	0
MXLOC_004655	0.672218	7.47757e-46	1.10235e-45
MXLOC_020195	5.43011	7.81055e-224	3.75631e-223
MXLOC_009065	-4.55021	2.97819e-17	2.4021e-17
MXLOC_012959	-0.201324	4.63367e-40	6.27371e-40
MXLOC_009354	-1.44246	2.94237e-15	2.21929e-15
MXLOC_000695	0.584474	6.73657e-118	1.94924e-117
MXLOC_013931	-0.108392	0.169903	0.0436941
MXLOC_012910	-0.643539	1.51904e-08	8.51792e-09
MXLOC_015262	0.261627	0.039819	0.011604
MXLOC_008053	-1.75062	0.000219375	8.84261e-05
MXLOC_014550	1.89155	0.0119677	0.00382653
MXLOC_015883	-0.15097	0.0612575	0.0172271
MXLOC_014454	-2.60178	5.1399e-251	2.73821e-250
MXLOC_013156	-0.64471	0.000322836	0.000127784
MXLOC_016494	-0.183721	0.00716744	0.00237822
MXLOC_006526	4.73774	0.000227792	9.16754e-05
MXLOC_005859	-0.997742	3.94125e-13	2.7688e-13
MXLOC_000281	-0.0174241	0.448586	0.103541
MXLOC_002051	0.0860281	0.0377481	0.0110426
MXLOC_019696	0.228808	0.000146414	6.0121e-05
MXLOC_016803	-2.01951	1.21125e-07	6.40608e-08
MXLOC_008653	-2.16393	6.30067e-31	7.25132e-31
MXLOC_013455	-0.136435	0.000231796	9.32256e-05
MXLOC_014299	-0.410931	4.50262e-05	1.94581e-05
MXLOC_005832	1.13431	2.85024e-31	3.30359e-31
MXLOC_012065	-0.099782	2.974e-07	1.52912e-07
MXLOC_001559	0.0565801	0.378462	0.0891414
MXLOC_004256	-0.0389693	0.0977022	0.0264025
MXLOC_005857	-0.366888	0.006871	0.00228637
MXLOC_004741	-0.555786	2.16438e-67	4.19163e-67
MXLOC_008087	-0.2705	0.0542005	0.0153893
MXLOC_000713	-0.228401	5.52871e-12	3.70081e-12
MXLOC_009473	-0.324828	8.02307e-06	3.699e-06
MXLOC_020667	-2.47722	7.35936e-11	4.67561e-11
MXLOC_009426	2.25733	0	0
MXLOC_007270	1.77208	0	0
MXLOC_004923	-0.161687	7.80603e-05	3.29543e-05
MXLOC_002771	2.98008	6.884e-111	1.90412e-110
MXLOC_003179	-6.1046	6.77995e-10	4.10659e-10
MXLOC_017326	0.175001	0.00301752	0.00105801
MXLOC_008855	-0.21047	1.6817e-08	9.40632e-09
MXLOC_009779	-0.906238	4.16357e-91	9.92415e-91
MXLOC_005625	0.303963	2.6565e-06	1.27708e-06
MXLOC_015339	-0.540592	9.27565e-07	4.60523e-07
MXLOC_020523	0.104163	8.4649e-07	4.21381e-07
MXLOC_021219	0.0103693	0.870366	0.182852
MXLOC_001271	-0.0521101	0.618575	0.136842
MXLOC_016187	-0.215448	0.153013	0.0397436
MXLOC_011355	0.0270169	0.714	0.154654
MXLOC_006748	0.008517	0.595924	0.132478
MXLOC_017579	-0.652586	2.9283e-279	1.70876e-278
MXLOC_010286	-0.732781	0.00020846	8.42488e-05
MXLOC_008263	1.54938	0.0254113	0.00766967
MXLOC_002213	-0.108454	0.547905	0.123241
MXLOC_000868	0.150347	2.8607e-10	1.7657e-10
MXLOC_005578	-0.446347	2.08855e-34	2.56979e-34
MXLOC_005755	0.138584	6.38082e-85	1.43894e-84
MXLOC_013140	0.0816987	0.0224878	0.00686688
MXLOC_018877	-0.243767	0.00697069	0.00231671
MXLOC_008603	0.947723	4.46936e-23	4.2955e-23
MXLOC_018146	0.101138	0.647586	0.14234
MXLOC_017487	-0.152343	1.92999e-07	1.00499e-07
MXLOC_018873	-0.416467	8.45709e-10	5.09595e-10
MXLOC_009549	-0.414909	4.79343e-70	9.51657e-70
MXLOC_019018	-1.39718	0.00145729	0.000534472
MXLOC_014071	0.801272	0	0
MXLOC_002011	0.371969	1.55358e-07	8.15317e-08
MXLOC_021502	-0.857439	7.44036e-22	6.91736e-22
MXLOC_004410	-0.0820217	0.423419	0.0984889
MXLOC_017011	-2.15	2.71621e-200	1.21112e-199
MXLOC_018753	0.465256	3.72967e-64	6.9482e-64
MXLOC_016400	0.527523	2.04276e-28	2.23637e-28
MXLOC_003441	0.12217	0.571949	0.12799
MXLOC_018558	-0.68086	4.33535e-23	4.17326e-23
MXLOC_007434	-0.116933	6.98864e-06	3.23763e-06
MXLOC_007437	-0.484472	1.13427e-06	5.60139e-07
MXLOC_008943	0.531383	1.68423e-24	1.6804e-24
MXLOC_008309	-0.377251	3.66965e-30	4.16362e-30
MXLOC_005569	-0.370859	1.72699e-07	9.03032e-08
MXLOC_008850	-0.439105	4.2661e-125	1.29487e-124
MXLOC_004743	1.10924	1.00612e-52	1.6289e-52
MXLOC_007117	-0.163016	5.68559e-12	3.8027e-12
MXLOC_008133	-0.480865	7.47189e-16	5.76354e-16
MXLOC_013842	-0.557994	0.00825073	0.00270848
MXLOC_012390	-1.85636	4.67596e-32	5.515e-32
MXLOC_001235	-0.0592859	0.132742	0.034927
MXLOC_009047	-0.800443	3.7575e-16	2.9228e-16
MXLOC_021029	0.546905	2.26047e-103	5.94355e-103
MXLOC_009269	0.072218	0.00174113	0.000631244
MXLOC_014154	-0.00995965	0.842246	0.177745
MXLOC_020263	0.901186	1.13626e-08	6.41633e-09
MXLOC_004737	0.493699	1.04704e-168	4.06191e-168
MXLOC_001759	-0.859639	0	0
MXLOC_008619	-0.647803	0.000763409	0.000289597
MXLOC_013176	-0.203537	1.75047e-10	1.09089e-10
MXLOC_006230	-0.37434	2.9606e-31	3.42825e-31
MXLOC_001072	0.450398	1.99496e-42	2.79696e-42
MXLOC_010058	0.0199325	0.771277	0.164756
MXLOC_016120	-0.038055	0.0903429	0.0245793
MXLOC_000862	0.111639	4.85837e-22	4.53668e-22
MXLOC_013500	0.0327026	0.449429	0.103716
MXLOC_020224	0.171678	0.024329	0.00736753
MXLOC_002982	0.745166	0	0
MXLOC_007348	-0.428813	4.33067e-113	1.21573e-112
MXLOC_018867	0.611942	4.80575e-11	3.08162e-11
MXLOC_010195	0.412144	1.12604e-15	8.62603e-16
MXLOC_003190	0.514555	0.000176031	7.17167e-05
MXLOC_011059	0.23233	3.61363e-05	1.57526e-05
MXLOC_005460	1.22226	1.16278e-122	3.46486e-122
MXLOC_019257	-1.19568	2.22288e-29	2.48241e-29
MXLOC_009431	-0.714316	5.28994e-28	5.74124e-28
MXLOC_013679	-1.19883	1.5398e-07	8.08346e-08
MXLOC_000631	1.03938	3.60705e-05	1.57254e-05
MXLOC_011722	-0.555024	2.76706e-05	1.21816e-05
MXLOC_003289	0.351028	1.46716e-25	1.50398e-25
MXLOC_003617	-2.77608	9.90121e-06	4.52359e-06
MXLOC_006883	0.307522	0.000384576	0.000151085
MXLOC_011636	-0.0616852	0.125637	0.0332144
MXLOC_004293	1.07832	3.62694e-111	1.0072e-110
MXLOC_020064	0.127659	0.0857245	0.0234243
MXLOC_000335	0.313276	2.23374e-10	1.38571e-10
MXLOC_021477	0.16559	0.00364259	0.00126291
MXLOC_021776	-0.341899	3.16229e-07	1.62167e-07
MXLOC_000740	-2.00545	0.00810963	0.00266431
MXLOC_015102	0.178466	9.12989e-15	6.78381e-15
MXLOC_004658	-1.58673	3.17374e-53	5.18803e-53
MXLOC_010661	1.92787	4.86181e-29	5.39009e-29
MXLOC_018851	1.37553	0.0390836	0.0114087
MXLOC_011892	0.287251	1.2979e-22	1.23098e-22
MXLOC_015731	0.582852	1.62085e-117	4.67064e-117
MXLOC_006796	-2.08416	7.61339e-06	3.51608e-06
MXLOC_000202	0.592384	1.8604e-218	8.79173e-218
MXLOC_011710	0.900668	1.02941e-50	1.62313e-50
MXLOC_018956	-1.0989	6.1126e-73	1.24693e-72
MXLOC_021632	-0.518169	0.00129616	0.000479108
MXLOC_010305	0.421159	1.10683e-71	2.22724e-71
MXLOC_017081	-0.290754	3.18918e-81	6.98288e-81
MXLOC_011885	-0.0511167	0.289496	0.0702448
MXLOC_013568	-0.105904	1.29094e-11	8.50641e-12
MXLOC_003326	1.03212	1.45099e-192	6.3033e-192
MXLOC_004397	1.01398	3.05426e-249	1.62358e-248
MXLOC_020316	-0.216903	0.0369376	0.0108272
MXLOC_005718	1.07617	4.58878e-09	2.65838e-09
MXLOC_007314	-0.201614	0.149915	0.0390404
MXLOC_001687	-2.76673	5.29169e-169	2.05777e-168
MXLOC_004751	0.329708	7.91109e-226	3.82722e-225
MXLOC_009768	-1.15438	1.695e-256	9.17971e-256
MXLOC_000668	0.260878	7.10709e-05	3.01023e-05
MXLOC_005317	0.170912	6.93472e-280	4.05631e-279
MXLOC_019495	-0.387014	9.78567e-14	7.02583e-14
MXLOC_005022	-0.197032	1.72996e-11	1.13321e-11
MXLOC_008778	1.19634	0.172215	0.044222
MXLOC_000224	0.200888	1.61247e-36	2.05851e-36
MXLOC_006452	-0.12378	0.000421063	0.00016455
MXLOC_000583	0.294171	1.44117e-25	1.47857e-25
MXLOC_012692	-0.738384	5.93411e-156	2.15204e-155
MXLOC_005148	0.133726	0.454477	0.104738
MXLOC_021740	-0.695376	6.9801e-52	1.11788e-51
MXLOC_011482	-0.42732	1.23292e-30	1.41032e-30
MXLOC_005311	0.321721	0.0487932	0.0139739
MXLOC_003327	1.1965	4.71422e-304	2.97041e-303
MXLOC_018253	0.0273333	0.744739	0.160093
MXLOC_003400	0.735095	5.12786e-51	8.11941e-51
MXLOC_007894	-0.290658	0.113773	0.0303072
MXLOC_021248	0.647243	0	0
MXLOC_021103	-0.0215543	0.756476	0.161976
MXLOC_007139	-0.515775	1.30593e-92	3.15734e-92
MXLOC_019795	-0.452237	7.35776e-22	6.84187e-22
MXLOC_003477	0.980904	2.88005e-78	6.1359e-78
MXLOC_015606	-0.719141	3.82124e-11	2.46096e-11
MXLOC_016303	0.880709	0	0
MXLOC_014998	2.00476	0.0047739	0.0016276
MXLOC_020670	-0.448277	6.78062e-43	9.58062e-43
MXLOC_017297	1.18708	0.000590422	0.000226946
MXLOC_018378	0.950575	5.28616e-05	2.27039e-05
MXLOC_010970	0.248129	5.8835e-16	4.55123e-16
MXLOC_016735	-0.272509	1.84439e-17	1.49848e-17
MXLOC_000043	0.113431	1.31897e-20	1.18529e-20
MXLOC_020422	0.0937908	2.26258e-57	3.88267e-57
MXLOC_004968	0.00963825	0.938686	0.19409
MXLOC_000352	0.105739	8.89553e-06	4.08126e-06
MXLOC_008460	0.248904	1.12356e-99	2.87847e-99
MXLOC_003633	-0.127049	2.01543e-17	1.63446e-17
MXLOC_002981	0.682602	1.53613e-123	4.59699e-123
MXLOC_010664	-0.290124	2.19864e-45	3.22474e-45
MXLOC_016525	2.5422	0	0
MXLOC_010827	-8.67728	1.02214e-42	1.43966e-42
MXLOC_000481	-0.512551	3.28537e-112	9.17027e-112
MXLOC_002844	-0.136554	0.00773926	0.00255204
MXLOC_010575	1.61597	1.96314e-33	2.37548e-33
MXLOC_007082	0.108874	0.150497	0.0391753
MXLOC_000819	0.147811	0.00125271	0.000463923
MXLOC_006688	-0.121776	4.19788e-12	2.82543e-12
MXLOC_002612	-0.905162	0.0247853	0.007496
MXLOC_013752	-0.256611	0.0377618	0.0110459
MXLOC_001649	-0.460417	0.000107605	4.47443e-05
MXLOC_020237	-0.419833	1.15358e-19	1.00458e-19
MXLOC_018723	-0.197488	1.42078e-06	6.96775e-07
MXLOC_013530	1.06651	2.94082e-25	2.99144e-25
MXLOC_001297	-2.21806	7.52147e-13	5.22326e-13
MXLOC_016958	-0.0224824	0.41708	0.097139
MXLOC_021641	0.0882238	0.0176765	0.00550449
MXLOC_013349	0.171442	0.00484323	0.00165002
MXLOC_017597	-0.665003	0.00145162	0.00053271
MXLOC_002586	-0.266159	1.63983e-10	1.02298e-10
MXLOC_011744	0.0567126	0.875347	0.183693
MXLOC_014020	-1.01825	3.58964e-76	7.50719e-76
MXLOC_006112	-0.0812929	1.85154e-22	1.74829e-22
MXLOC_011254	0.00023449	0.99574	0.203542
MXLOC_007374	-0.601031	4.79885e-07	2.43289e-07
MXLOC_004717	0.338274	3.09691e-68	6.04786e-68
MXLOC_007922	0.31065	1.58654e-33	1.92231e-33
MXLOC_013172	0.829602	0.000208655	8.43206e-05
MXLOC_007549	0.474381	1.28157e-95	3.17689e-95
MXLOC_002714	0.0321383	0.00369093	0.00127867
MXLOC_009242	-0.538294	9.25517e-28	9.98939e-28
MXLOC_006917	-0.367228	8.19554e-94	1.99821e-93
MXLOC_007347	-8.2248	3.30958e-33	3.98603e-33
MXLOC_012083	-0.0144163	0.972094	0.199515
MXLOC_009676	0.154781	8.17475e-12	5.42749e-12
MXLOC_007223	-0.613218	5.43781e-72	1.09875e-71
MXLOC_001577	-0.0694956	0.307619	0.074168
MXLOC_015466	-0.471626	5.49743e-187	2.33633e-186
MXLOC_005230	-2.56359	1.82091e-114	5.17707e-114
MXLOC_020947	-0.671123	3.27702e-14	2.38782e-14
MXLOC_008473	0.103246	0.00416392	0.0014326
MXLOC_002780	-0.889629	9.51235e-39	1.26174e-38
MXLOC_005659	0.600269	1.62267e-131	5.15198e-131
MXLOC_001325	9.39273	9.202e-78	1.95028e-77
MXLOC_011596	-0.106596	5.70486e-21	5.18472e-21
MXLOC_016079	-0.04615	0.872293	0.18317
MXLOC_009061	-0.158989	0.0248867	0.00752293
MXLOC_007183	-0.45471	9.80681e-52	1.5675e-51
MXLOC_008827	-0.0364455	0.357812	0.0848366
MXLOC_013295	-0.442041	0.00195832	0.00070368
MXLOC_006807	7.01674	5.37186e-16	4.1607e-16
MXLOC_017872	-0.00920028	0.962337	0.19796
MXLOC_003932	-1.31571	7.79305e-10	4.70451e-10
MXLOC_008332	-0.0415828	0.258074	0.0635048
MXLOC_005714	-0.00411087	0.907486	0.189122
MXLOC_013743	-0.0872662	0.320377	0.0769145
MXLOC_012226	-0.146437	0.00748228	0.00247413
MXLOC_007061	0.216582	2.19273e-11	1.42775e-11
MXLOC_006088	-0.192787	6.43387e-07	3.23235e-07
MXLOC_017248	-0.527817	1.97283e-06	9.57439e-07
MXLOC_008729	-0.39961	8.74012e-21	7.89925e-21
MXLOC_002291	-1.57885	1.59095e-48	2.43789e-48
MXLOC_010045	6.06986	2.70387e-09	1.58384e-09
MXLOC_007077	-0.662618	4.03543e-26	4.18666e-26
MXLOC_000812	-0.137239	0.0291983	0.00872233
MXLOC_000460	1.13655	0.0517395	0.014748
MXLOC_019881	0.572189	6.84012e-12	4.56055e-12
MXLOC_007271	0.342619	0.00019059	7.73842e-05
MXLOC_018574	0.545158	2.89818e-20	2.57702e-20
MXLOC_016610	1.0478	0	0
MXLOC_009085	-0.0225479	0.63657	0.140246
MXLOC_013385	-0.927882	0.0304907	0.00908236
MXLOC_002061	-0.259285	1.14859e-06	5.66865e-07
MXLOC_008608	-0.445191	1.28728e-14	9.51721e-15
MXLOC_019119	1.3441	5.11855e-09	2.9534e-09
MXLOC_019576	-0.14024	1.22709e-07	6.48771e-08
MXLOC_017978	0.0152595	0.398621	0.0933774
MXLOC_020411	-0.660567	0.000249757	0.000100088
MXLOC_007130	0.0560298	2.77746e-08	1.53269e-08
MXLOC_014330	0.764374	1.18338e-41	1.6357e-41
MXLOC_020844	-1.16256	9.09738e-05	3.80971e-05
MXLOC_003460	1.12443	4.24618e-06	2.00025e-06
MXLOC_006602	-0.683345	8.35374e-144	2.84413e-143
MXLOC_010699	-0.417882	1.41477e-07	7.44867e-08
MXLOC_019948	0.0894213	0.0274215	0.00823425
MXLOC_007595	-0.689285	9.52155e-14	6.8392e-14
MXLOC_002279	0.465421	4.58947e-13	3.21311e-13
MXLOC_017175	0.141064	5.75614e-22	5.36682e-22
MXLOC_008632	-0.48313	4.12992e-12	2.78007e-12
MXLOC_005838	-1.80961	1.52635e-205	6.93205e-205
MXLOC_020741	-0.393339	0.00217751	0.000777874
MXLOC_014538	-0.00149889	0.951925	0.196239
MXLOC_011399	-0.747472	9.20331e-10	5.53266e-10
MXLOC_012208	-0.245214	7.86744e-40	1.06109e-39
MXLOC_008817	-0.260278	3.38885e-68	6.6127e-68
MXLOC_009326	0.304874	2.36634e-41	3.25429e-41
MXLOC_007663	-0.226948	0.15679	0.0406558
MXLOC_006824	-0.331906	6.27695e-05	2.67458e-05
MXLOC_009844	-0.105342	7.05483e-07	3.53344e-07
MXLOC_001623	0.190615	2.97189e-20	2.64063e-20
MXLOC_014978	0.0648483	0.447276	0.103282
MXLOC_015510	-0.627457	7.32821e-65	1.37832e-64
MXLOC_019362	2.87831	4.74289e-20	4.19369e-20
MXLOC_016527	-0.431068	1.1455e-05	5.21109e-06
MXLOC_008169	-0.555254	3.40691e-92	8.19641e-92
MXLOC_007101	0.0373495	0.444945	0.102797
MXLOC_003581	-4.58666	0.000364893	0.000143641
MXLOC_012726	-0.338786	0.00104044	0.000389259
MXLOC_000818	0.213269	6.84618e-06	3.17404e-06
MXLOC_005612	-0.135515	7.51999e-28	8.13629e-28
MXLOC_007677	-1.32995	4.10617e-43	5.82531e-43
MXLOC_006444	1.51958	0.0014989	0.000549279
MXLOC_013775	0.257458	8.86043e-07	4.40488e-07
MXLOC_013853	0.403859	1.26455e-74	2.61889e-74
MXLOC_009681	-0.535976	2.84798e-10	1.75829e-10
MXLOC_020668	-0.190973	0.0710062	0.0197318
MXLOC_001501	-1.02539	3.05451e-09	1.78496e-09
MXLOC_009694	-0.364938	9.85532e-19	8.33335e-19
MXLOC_004458	0.0041307	0.933347	0.193263
MXLOC_004962	-0.0404964	0.175721	0.045028
MXLOC_004649	0.078974	0.216164	0.054161
MXLOC_008804	-0.0916551	0.104409	0.0280262
MXLOC_005706	-0.39244	2.6002e-99	6.64067e-99
MXLOC_007103	-0.160972	0.000116644	4.83261e-05
MXLOC_018835	-7.89447	1.39541e-27	1.49917e-27
MXLOC_007066	0.494342	2.6225e-08	1.44914e-08
MXLOC_006901	1.04864	1.15493e-302	7.24916e-302
MXLOC_015889	-6.53876	1.02948e-12	7.10586e-13
MXLOC_010444	-0.959752	1.15306e-19	1.00431e-19
MXLOC_006249	1.04675	3.02267e-15	2.27845e-15
MXLOC_005508	-0.394083	4.8925e-62	8.91437e-62
MXLOC_001229	0.854541	3.84289e-236	1.95371e-235
MXLOC_000699	0.0360913	0.0480804	0.0137802
MXLOC_019444	-1.36317	0.000221838	8.93896e-05
MXLOC_007524	2.08498	0	0
MXLOC_017949	-0.283168	3.23668e-06	1.54267e-06
MXLOC_011819	0.923219	2.99245e-280	1.75246e-279
MXLOC_016292	-0.105141	0.0958247	0.0259338
MXLOC_017607	-1.17513	2.49737e-126	7.66087e-126
MXLOC_013559	0.126671	0.109013	0.0291614
MXLOC_001752	0.165089	0.0988984	0.0266993
MXLOC_007998	0.0453124	0.738413	0.158958
MXLOC_010938	-0.164773	3.46637e-08	1.90022e-08
MXLOC_009664	-0.0235504	0.668583	0.146221
MXLOC_017511	1.18522	1.31523e-30	1.50413e-30
MXLOC_008219	-0.722563	0.00443426	0.00152101
MXLOC_006635	-0.91086	4.5111e-42	6.28147e-42
MXLOC_007850	-1.87349	1.01197e-31	1.18527e-31
MXLOC_009390	-0.639677	7.37127e-118	2.13163e-117
MXLOC_014339	-0.623688	8.51469e-31	9.78099e-31
MXLOC_007674	-0.080108	3.75048e-09	2.18229e-09
MXLOC_021737	-0.647494	1.51211e-28	1.66025e-28
MXLOC_008962	-1.27601	9.86555e-162	3.69833e-161
MXLOC_004125	0.0526551	0.238956	0.059241
MXLOC_009207	0.803424	7.1851e-09	4.11236e-09
MXLOC_008029	-0.0394021	0.536969	0.121026
MXLOC_007461	-0.63804	2.3997e-12	1.63265e-12
MXLOC_018105	0.127481	0.0815622	0.0223844
MXLOC_010909	-0.39253	0.00745055	0.00246448
MXLOC_008280	-0.633145	2.67115e-07	1.37847e-07
MXLOC_005581	-0.221456	8.42401e-24	8.26174e-24
MXLOC_003948	-0.522256	1.18993e-95	2.95121e-95
MXLOC_006717	-0.649483	1.41053e-20	1.26595e-20
MXLOC_007540	0.324006	2.48462e-12	1.68891e-12
MXLOC_018900	-0.292732	1.42119e-05	6.41285e-06
MXLOC_011664	0.616944	2.84112e-150	9.97826e-150
MXLOC_015377	-0.462947	0	0
MXLOC_001506	0.460752	4.62592e-41	6.34747e-41
MXLOC_001543	-0.0169459	0.0790785	0.0217907
MXLOC_017378	-0.94087	0	0
MXLOC_015900	0.418517	1.33395e-37	1.73553e-37
MXLOC_004427	0.200361	5.56628e-162	2.09145e-161
MXLOC_003063	-3.11154	6.09663e-10	3.70003e-10
MXLOC_014681	-0.000165832	0.992247	0.20297
MXLOC_015082	-1.79934	1.47764e-19	1.28405e-19
MXLOC_005306	1.26922	0.000655396	0.000250505
MXLOC_020183	0.063367	0.0421806	0.012247
MXLOC_005144	-0.241442	0.220463	0.0551085
MXLOC_021539	-0.214433	0.00569833	0.00192442
MXLOC_002127	-0.0948414	6.34484e-08	3.41957e-08
MXLOC_002779	-0.257436	1.6641e-22	1.57433e-22
MXLOC_008402	-0.272834	8.23215e-123	2.45453e-122
MXLOC_006233	-0.389541	9.30262e-07	4.61815e-07
MXLOC_015206	3.76365	0.0133847	0.00423919
MXLOC_013475	-0.636172	1.0343e-41	1.43084e-41
MXLOC_018571	-0.261841	6.87865e-14	4.96123e-14
MXLOC_019826	-0.229115	0.000230304	9.26483e-05
MXLOC_006869	-0.474063	1.59991e-23	1.55662e-23
MXLOC_017669	0.574721	0.0014141	0.000519642
MXLOC_000082	0.817394	4.1523e-07	2.11188e-07
MXLOC_013913	0.0482775	0.00131535	0.00048558
MXLOC_016672	-0.200414	2.2606e-09	1.33024e-09
MXLOC_010301	0.184245	2.69688e-09	1.57994e-09
MXLOC_020106	-0.928218	3.35593e-11	2.16784e-11
MXLOC_009569	-0.146804	0.227694	0.0566872
MXLOC_006195	-1.50984	0.218149	0.0546025
MXLOC_018298	-0.113058	0.00140476	0.000516445
MXLOC_005662	-1.21806	3.11519e-102	8.10386e-102
MXLOC_007329	-2.86362	1.97603e-153	7.08223e-153
MXLOC_021432	-0.302599	0.00147914	0.000542324
MXLOC_007508	-0.116141	3.70757e-13	2.608e-13
MXLOC_001891	-0.0379917	0.486715	0.111251
MXLOC_011931	-0.320457	2.46191e-68	4.81355e-68
MXLOC_013434	-0.040982	0.0677432	0.018912
MXLOC_011715	-0.100793	0.000792923	0.000300443
MXLOC_016471	1.25072	2.23551e-12	1.52306e-12
MXLOC_021732	-0.0163221	0.805989	0.171089
MXLOC_019302	-0.147373	0.543869	0.122471
MXLOC_002485	0.0340585	0.00686383	0.00228429
MXLOC_016746	-0.11981	2.90778e-06	1.39228e-06
MXLOC_000180	-0.100055	0.437066	0.101192
MXLOC_021617	0.354442	3.04775e-17	2.45578e-17
MXLOC_001011	0.0282509	0.104156	0.0279676
MXLOC_003881	0.398107	1.09551e-13	7.8493e-14
MXLOC_021331	-0.214958	0.00082324	0.000311448
MXLOC_016156	-0.385679	7.84013e-72	1.58089e-71
MXLOC_021001	0.167327	0.132769	0.0349321
MXLOC_007282	0.493437	0.0135877	0.00429876
MXLOC_019956	-7.43377	3.04371e-21	2.78741e-21
MXLOC_009697	-0.08952	2.34637e-11	1.52596e-11
MXLOC_013133	0.0947863	1.82179e-11	1.19177e-11
MXLOC_000422	0.300848	2.00888e-42	2.81568e-42
MXLOC_006616	0.977217	2.17883e-10	1.35233e-10
MXLOC_017751	-0.562918	0.000422295	0.000164977
MXLOC_001282	-0.791255	1.4687e-06	7.19703e-07
MXLOC_015868	0.307173	6.01093e-200	2.6729e-199
MXLOC_015279	-1.01795	6.39012e-26	6.60579e-26
MXLOC_003548	0.097829	0.00687429	0.00228731
MXLOC_017304	0.270564	6.69923e-177	2.71061e-176
MXLOC_006724	-0.785708	0.00380678	0.00131648
MXLOC_007024	0.234572	1.30474e-08	7.3423e-09
MXLOC_017459	-0.215531	4.59066e-12	3.08513e-12
MXLOC_002561	-0.316375	7.0147e-16	5.41429e-16
MXLOC_001608	0.872177	0.00798888	0.00262824
MXLOC_009402	-0.119853	2.16461e-07	1.12406e-07
MXLOC_006393	-0.653221	1.03354e-10	6.51398e-11
MXLOC_011798	-0.536352	2.34741e-13	1.66222e-13
MXLOC_020647	-5.72386	6.06761e-08	3.27556e-08
MXLOC_020963	0.117205	1.00324e-05	4.58011e-06
MXLOC_002230	-0.256794	2.82518e-18	2.35513e-18
MXLOC_017971	-0.0651804	0.0101624	0.0032908
MXLOC_012313	-0.142119	1.45028e-07	7.62578e-08
MXLOC_010956	-0.0538619	0.031977	0.00949563
MXLOC_014710	-0.477149	1.4246e-93	3.46307e-93
MXLOC_005047	1.12936	2.31868e-59	4.06878e-59
MXLOC_016878	-0.358711	3.99851e-87	9.18202e-87
MXLOC_009378	0.280496	2.98021e-13	2.10452e-13
MXLOC_016535	0.025457	0.437067	0.101192
MXLOC_015658	0.0883279	0.000690759	0.000263117
MXLOC_018013	-2.3316	8.847e-214	4.11726e-213
MXLOC_019701	-2.65769	1.5188e-15	1.15823e-15
MXLOC_014090	0.120243	8.8225e-11	5.58686e-11
MXLOC_008418	-2.51762	2.90941e-07	1.49685e-07
MXLOC_014601	0.386796	3.18477e-10	1.96029e-10
MXLOC_014979	1.21914	9.09511e-23	8.66645e-23
MXLOC_021238	0.276636	0.00180243	0.00065173
MXLOC_013803	4.3452	5.87916e-69	1.15736e-68
MXLOC_012172	2.07447	1.78878e-08	9.9904e-09
MXLOC_016178	0.557058	0.17196	0.0441662
MXLOC_017210	0.303233	5.81652e-20	5.12264e-20
MXLOC_008990	-0.30051	8.16927e-17	6.48646e-17
MXLOC_014049	-1.99418	4.02075e-26	4.17231e-26
MXLOC_012270	0.0505462	0.323089	0.0774971
MXLOC_002717	0.158373	4.60453e-07	2.33583e-07
MXLOC_007276	1.0772	0.00150436	0.000551181
MXLOC_006779	-0.239587	2.21562e-127	6.84806e-127
MXLOC_019908	0.497907	4.42867e-15	3.32394e-15
MXLOC_015370	0.00722993	0.924371	0.191814
MXLOC_019499	-0.657251	1.54045e-07	8.08598e-08
MXLOC_015116	0.418552	0.0264452	0.00795816
MXLOC_011984	-2.04879	8.20739e-58	1.41337e-57
MXLOC_013636	-0.240029	1.66815e-14	1.22867e-14
MXLOC_012218	-0.258544	6.76219e-41	9.26319e-41
MXLOC_009967	0.783179	6.94048e-162	2.60579e-161
MXLOC_017681	-0.525632	1.72975e-38	2.28449e-38
MXLOC_000050	1.02871	0.0150026	0.00472314
MXLOC_014917	-0.415631	0.000434697	0.000169524
MXLOC_018880	-1.10336	5.78551e-37	7.44805e-37
MXLOC_010391	0.069284	0.278523	0.0679085
MXLOC_002468	-0.260634	4.34065e-78	9.21559e-78
MXLOC_014702	0.948646	1.90846e-26	1.99733e-26
MXLOC_017265	-1.70247	2.46628e-13	1.74488e-13
MXLOC_019324	-0.222065	0.293776	0.0711668
MXLOC_014824	1.42304	0	0
MXLOC_003475	0.208935	0.0685117	0.0191037
MXLOC_016198	0.375428	2.64404e-61	4.76788e-61
MXLOC_000541	-0.142709	0.000562008	0.000216585
MXLOC_003560	0.381892	6.18987e-21	5.61613e-21
MXLOC_005818	0.176911	0.366739	0.0867515
MXLOC_012921	0.00111052	0.975028	0.200025
MXLOC_015385	-0.437357	0.124232	0.0328609
MXLOC_006857	0.217813	0.00191779	0.000690078
MXLOC_015169	0.420617	2.0316e-28	2.22465e-28
MXLOC_018540	0.196473	0.00177835	0.000643829
MXLOC_000674	-0.107496	0.00242319	0.000861049
MXLOC_011228	-0.389958	0.0117121	0.00375117
MXLOC_021426	0.0278195	0.906251	0.188907
MXLOC_009525	0.468681	1.02821e-07	5.46339e-08
MXLOC_015720	0.101793	7.37682e-10	4.45874e-10
MXLOC_011088	-0.412475	5.95405e-120	1.74656e-119
MXLOC_018516	0.15378	0.00188646	0.000679413
MXLOC_010554	-0.905319	0	0
MXLOC_001949	1.57783	3.19191e-53	5.21598e-53
MXLOC_015985	-5.50682	5.19287e-07	2.62667e-07
MXLOC_017644	0.121134	4.37281e-13	3.06494e-13
MXLOC_013671	-0.0202064	0.719444	0.155681
MXLOC_019250	3.68801	0.0167527	0.00523413
MXLOC_014840	-0.682419	3.96874e-06	1.87588e-06
MXLOC_013013	-0.0770374	0.121863	0.0322935
MXLOC_019376	-0.334949	0.282471	0.068724
MXLOC_012483	-0.328655	1.47936e-61	2.67853e-61
MXLOC_004479	0.0948361	0.109049	0.0291694
MXLOC_007637	-1.02908	3.04893e-25	3.09932e-25
MXLOC_010245	0.314328	2.50174e-89	5.87441e-89
MXLOC_017449	0.293126	3.30127e-09	1.92525e-09
MXLOC_015660	0.184772	9.58679e-12	6.35035e-12
MXLOC_006138	0.276261	1.24699e-13	8.91382e-14
MXLOC_012432	-0.134454	7.23768e-26	7.47249e-26
MXLOC_001769	-0.927137	2.24853e-31	2.61422e-31
MXLOC_005298	0.394246	2.68898e-10	1.66285e-10
MXLOC_009420	-0.543891	1.63256e-09	9.68937e-10
MXLOC_001785	-1.07551	5.87316e-31	6.76566e-31
MXLOC_018173	0.00344302	0.916115	0.190461
MXLOC_002868	0.277012	3.5804e-26	3.71931e-26
MXLOC_000739	-0.296126	6.13558e-09	3.52444e-09
MXLOC_005633	-0.636441	1.85463e-18	1.5532e-18
MXLOC_004465	0.348228	4.51899e-98	1.14693e-97
MXLOC_003430	0.526832	1.14508e-184	4.81213e-184
MXLOC_016582	-0.365215	6.47732e-73	1.32078e-72
MXLOC_004309	0.0731357	0.280106	0.0682165
MXLOC_020355	0.292711	3.50943e-06	1.66747e-06
MXLOC_020516	-0.00525421	0.955913	0.196937
MXLOC_011181	-0.690309	2.24802e-180	9.23319e-180
MXLOC_006398	0.81795	0.176864	0.0452875
MXLOC_011812	1.42985	3.03134e-07	1.5568e-07
MXLOC_021044	-0.652894	0.00369665	0.00128048
MXLOC_010428	-0.410275	6.41345e-32	7.54428e-32
MXLOC_000488	0.608897	3.19839e-26	3.32812e-26
MXLOC_019365	1.68581	5.42573e-32	6.39007e-32
MXLOC_005906	0.48189	1.34093e-26	1.40698e-26
MXLOC_006160	0.49261	2.0334e-302	1.27468e-301
MXLOC_012056	0.0983262	0.233896	0.0581042
MXLOC_015756	-0.317847	5.80912e-49	8.97177e-49
MXLOC_017518	2.41819	6.07187e-12	4.05607e-12
MXLOC_019633	1.06466	1.02918e-09	6.17108e-10
MXLOC_020482	-0.160331	0.52325	0.118473
MXLOC_003584	0.183248	0.0176945	0.00550776
MXLOC_010501	-0.606185	1.04436e-10	6.5796e-11
MXLOC_013352	0.0498297	7.31623e-05	3.09613e-05
MXLOC_008447	-1.96168	1.91913e-53	3.14556e-53
MXLOC_007653	-3.61926	3.07278e-47	4.62176e-47
MXLOC_015431	0.71647	0.0183151	0.0056838
MXLOC_020870	-0.996873	0.00222222	0.000792978
MXLOC_008070	2.93663	7.05696e-11	4.48931e-11
MXLOC_018362	-0.00702952	0.966893	0.198766
MXLOC_002623	0.599942	3.49071e-18	2.90399e-18
MXLOC_000950	0.129195	0.388027	0.091153
MXLOC_004585	0.176732	5.2569e-07	2.6574e-07
MXLOC_004537	0.282529	8.80239e-47	1.31347e-46
MXLOC_015488	-0.138837	0.354205	0.0840966
MXLOC_010859	0.647621	1.43353e-05	6.46554e-06
MXLOC_002768	0.819041	6.68108e-115	1.90393e-114
MXLOC_016677	0.407145	2.89239e-06	1.38518e-06
MXLOC_010556	-0.529717	4.22912e-13	2.96677e-13
MXLOC_000696	0.526639	0.2478	0.061198
MXLOC_013774	-2.19769	3.05934e-36	3.89242e-36
MXLOC_004288	-0.532232	5.97872e-18	4.93607e-18
MXLOC_010639	2.73777	1.18227e-05	5.3739e-06
MXLOC_012022	0.113228	0.134847	0.0354387
MXLOC_021553	-0.411974	0.00558825	0.00188906
MXLOC_007318	0.736511	1.23559e-12	8.50332e-13
MXLOC_002641	-0.275871	1.79276e-05	8.01561e-06
MXLOC_005656	-0.243826	2.12859e-33	2.57378e-33
MXLOC_002836	-0.298043	2.24184e-25	2.28756e-25
MXLOC_001340	-0.406013	0.116563	0.0309929
MXLOC_006772	0.720309	0	0
MXLOC_008382	-0.461828	8.05199e-28	8.70804e-28
MXLOC_004401	-0.254743	6.82976e-05	2.89878e-05
MXLOC_012607	0.297337	8.01561e-33	9.58788e-33
MXLOC_014652	-1.42654	9.67341e-17	7.66708e-17
MXLOC_004516	0.108471	0.0633683	0.0177748
MXLOC_016532	-0.296038	7.25676e-11	4.61402e-11
MXLOC_013522	-0.124589	0.485335	0.110961
MXLOC_020540	-0.227096	1.12679e-08	6.36579e-09
MXLOC_016614	-1.2887	2.11855e-204	9.59492e-204
MXLOC_001903	-0.225138	4.75192e-28	5.16533e-28
MXLOC_016441	0.0340971	0.0240489	0.00728994
MXLOC_020972	-0.467933	0.00291529	0.00102417
MXLOC_002101	-0.349023	0.00262961	0.000929074
MXLOC_007227	-1.10862	1.19996e-30	1.37326e-30
MXLOC_005577	1.80514	1.0208e-118	2.9695e-118
MXLOC_004920	-2.56751	2.10047e-90	4.96791e-90
MXLOC_001947	0.441606	0.0241238	0.007309
MXLOC_013152	0.712063	8.94808e-227	4.35039e-226
MXLOC_017920	0.0352754	0.0928448	0.0251931
MXLOC_009145	0.0740116	5.3578e-07	2.70785e-07
MXLOC_006870	0.241144	1.392e-07	7.33427e-08
MXLOC_006672	0.459839	3.09185e-84	6.93732e-84
MXLOC_012839	0.564867	4.71246e-20	4.16753e-20
MXLOC_006815	-0.399927	2.54224e-13	1.79783e-13
MXLOC_001729	0.0163521	0.654119	0.14357
MXLOC_014389	-0.362487	8.57016e-17	6.80256e-17
MXLOC_020301	0.350386	5.1893e-25	5.24484e-25
MXLOC_012030	-0.127791	2.88107e-14	2.10401e-14
MXLOC_020819	-0.0419135	0.685231	0.149367
MXLOC_021099	-0.397516	0.000143253	5.88573e-05
MXLOC_017128	0.0195721	0.716059	0.155017
MXLOC_007456	-0.096531	0.283753	0.069013
MXLOC_010977	-2.24164	1.53049e-18	1.28636e-18
MXLOC_018102	-0.280899	1.12317e-09	6.71494e-10
MXLOC_008463	0.466505	1.47141e-155	5.33221e-155
MXLOC_011671	-0.125195	0.00224582	0.000800866
MXLOC_014625	-0.613564	2.20479e-05	9.8014e-06
MXLOC_006394	-0.910708	9.55641e-11	6.03699e-11
MXLOC_017825	0.131729	0.000558092	0.000215229
MXLOC_002515	0.487515	0.158904	0.0411601
MXLOC_019366	-0.441229	0.0755341	0.0208834
MXLOC_011778	-4.72178	0.000172532	7.03441e-05
MXLOC_004244	0.215466	0.00216509	0.000773662
MXLOC_018917	1.00291	2.49894e-08	1.38273e-08
MXLOC_001796	-0.193362	0.216265	0.0541782
MXLOC_003831	0.0463524	0.00234496	0.000834525
MXLOC_021257	-1.29434	4.7982e-31	5.53255e-31
MXLOC_016609	0.292448	0.000127135	5.24905e-05
MXLOC_001036	-1.82668	2.34543e-17	1.89831e-17
MXLOC_009810	0.168246	0.000292943	0.000116554
MXLOC_014496	0.26167	0.000272579	0.000108824
MXLOC_002769	0.382704	1.39025e-41	1.91894e-41
MXLOC_009588	-0.250148	0.00458185	0.00156747
MXLOC_015827	-0.323133	3.22227e-08	1.76997e-08
MXLOC_003415	0.201765	2.05112e-120	6.03121e-120
MXLOC_013454	-0.294235	9.18472e-21	8.29343e-21
MXLOC_012740	-1.55321	9.7462e-19	8.24393e-19
MXLOC_009674	0.170863	0.0352675	0.0103871
MXLOC_005844	-3.24158	1.71457e-18	1.43861e-18
MXLOC_000570	0.323567	0.0547661	0.0155408
MXLOC_021327	-0.0787888	0.00179963	0.000650813
MXLOC_021301	0.766826	3.13992e-51	4.98624e-51
MXLOC_016070	-3.2968	1.09479e-23	1.07048e-23
MXLOC_000371	0.260624	0.231874	0.0576506
MXLOC_006763	-0.590847	2.31081e-13	1.63677e-13
MXLOC_013558	-0.204686	0.00152607	0.000558737
MXLOC_013607	-0.803051	8.09621e-12	5.3768e-12
MXLOC_019757	-0.146737	0.0217501	0.00665575
MXLOC_005833	-1.34292	0.0393402	0.0114768
MXLOC_020736	0.672317	0.0241953	0.00732937
MXLOC_021697	0.186187	0.00451771	0.00154801
MXLOC_011335	0.202916	0.00799475	0.00262992
MXLOC_015141	-3.62355	0	0
MXLOC_016869	0.133169	0.199863	0.050511
MXLOC_001637	3.76588	0.0132942	0.00421243
MXLOC_005805	0.553651	0.0317305	0.00942758
MXLOC_013552	0.779752	3.8233e-21	3.49027e-21
MXLOC_005644	-0.553708	2.05524e-08	1.14408e-08
MXLOC_008305	0.351791	2.34139e-06	1.13093e-06
MXLOC_013306	-0.691049	6.64011e-254	3.56849e-253
MXLOC_015268	-0.366458	4.87231e-09	2.81564e-09
MXLOC_013813	-1.05786	2.9686e-06	1.42028e-06
MXLOC_013271	-0.465977	1.13172e-08	6.39218e-09
MXLOC_018655	0.504783	0.00098813	0.00037048
MXLOC_009807	0.625947	1.89636e-19	1.63922e-19
MXLOC_014183	-2.53573	0	0
MXLOC_016562	-0.0936512	0.389696	0.0915056
MXLOC_019421	-0.301258	0.0346876	0.0102267
MXLOC_013474	-0.0428242	8.86883e-06	4.07015e-06
MXLOC_017488	-0.482001	4.15287e-90	9.79846e-90
MXLOC_019453	-0.44915	8.5541e-176	3.44688e-175
MXLOC_007419	-0.422567	1.05513e-06	5.22215e-07
MXLOC_012189	0.812147	2.04779e-07	1.06497e-07
MXLOC_016581	-0.469673	8.94089e-70	1.77148e-69
MXLOC_002633	-0.652739	0.0160679	0.00503557
MXLOC_018297	0.218989	0.00118768	0.00044111
MXLOC_007612	0.892602	5.0436e-07	2.55354e-07
MXLOC_011801	-0.324674	1.20246e-09	7.17669e-10
MXLOC_021789	-2.15846	4.28352e-39	5.70341e-39
MXLOC_001802	-0.189114	0.0249957	0.00755308
MXLOC_005597	-0.342198	6.42211e-17	5.11996e-17
MXLOC_005680	2.3529	2.53611e-163	9.60277e-163
MXLOC_003585	-0.184144	3.23203e-10	1.98813e-10
MXLOC_020367	0.499782	4.27963e-24	4.22598e-24
MXLOC_009415	-1.91757	4.53237e-06	2.13158e-06
MXLOC_019478	0.0286485	0.444142	0.102661
MXLOC_019396	0.153584	0.191212	0.04851
MXLOC_008904	-0.0514283	0.10044	0.0270305
MXLOC_003333	-0.936319	2.66763e-17	2.15516e-17
MXLOC_000237	-0.220339	2.24123e-09	1.31931e-09
MXLOC_006387	-5.314	2.8112e-06	1.34735e-06
MXLOC_011235	0.606864	3.36771e-29	3.74468e-29
MXLOC_004671	0.853178	3.09909e-69	6.12049e-69
MXLOC_012491	0.511062	8.84458e-15	6.57481e-15
MXLOC_019560	1.82455	2.31007e-199	1.02536e-198
MXLOC_014638	0.266601	0.0151759	0.00477316
MXLOC_011467	-0.142075	0.012334	0.00392675
MXLOC_000888	-0.540799	0.000722385	0.000274658
MXLOC_017001	0.39048	0.0217045	0.00664344
MXLOC_017237	0.272227	0.0949929	0.0257179
MXLOC_016845	-0.118913	0.273048	0.0667465
MXLOC_017398	0.0396231	0.166091	0.0428314
MXLOC_007454	-0.426495	0.0224088	0.0068449
MXLOC_017312	0.318376	0.00332488	0.0011599
MXLOC_012049	1.06973	2.70193e-26	2.81692e-26
MXLOC_009052	0.716292	8.67749e-53	1.40814e-52
MXLOC_008072	0.166378	0.263742	0.06474
MXLOC_013233	-0.447748	2.80869e-09	1.64406e-09
MXLOC_002131	-0.334524	1.28375e-152	4.57427e-152
MXLOC_018368	-0.266254	4.43716e-09	2.57328e-09
MXLOC_013492	0.184547	0.000478095	0.000185665
MXLOC_013245	-2.38597	9.15072e-69	1.79777e-68
MXLOC_008103	-1.29058	5.34987e-40	7.23739e-40
MXLOC_010581	-0.339456	6.23979e-47	9.33365e-47
MXLOC_011890	3.27785	0	0
MXLOC_015919	0.26858	4.94151e-05	2.12853e-05
MXLOC_005828	-0.0993398	1.57533e-05	7.07771e-06
MXLOC_003349	0.249367	4.79652e-21	4.36894e-21
MXLOC_020469	0.273703	1.63164e-05	7.3213e-06
MXLOC_017358	-0.478897	0.00828735	0.00271959
MXLOC_016460	0.124806	1.04526e-22	9.94641e-23
MXLOC_016392	0.366998	2.15666e-05	9.59355e-06
MXLOC_009917	-0.520791	9.90969e-162	3.71203e-161
MXLOC_010472	0.587325	2.06223e-21	1.89782e-21
MXLOC_009233	-0.470798	2.29977e-15	1.74265e-15
MXLOC_001657	-0.210936	4.49051e-110	1.23719e-109
MXLOC_016065	-0.750518	6.61259e-10	4.00671e-10
MXLOC_012988	-0.0408507	0.429691	0.0997155
MXLOC_020340	-0.85672	3.90867e-20	3.46295e-20
MXLOC_008959	-1.12981	0	0
MXLOC_016302	-0.155593	1.09796e-22	1.04418e-22
MXLOC_018385	-0.840868	5.38973e-80	1.16603e-79
MXLOC_017661	-0.255006	0.00698925	0.00232224
MXLOC_008327	-0.551456	0	0
MXLOC_019496	-0.626074	4.32678e-05	1.87297e-05
MXLOC_004492	0.657989	6.88519e-59	1.20131e-58
MXLOC_021345	-0.222557	0.0215463	0.0066041
MXLOC_001069	-0.604311	1.78887e-25	1.8284e-25
MXLOC_013430	0.0588783	0.0217579	0.00665771
MXLOC_014733	-1.23488	4.3501e-11	2.79457e-11
MXLOC_003408	0.610329	2.11293e-88	4.91429e-88
MXLOC_000863	-0.277788	5.92506e-12	3.9607e-12
MXLOC_013789	0.386752	1.01833e-55	1.71503e-55
MXLOC_016450	0.0333698	0.617945	0.136722
MXLOC_017191	-0.430839	0.00116301	0.000432372
MXLOC_002683	1.14835	7.36045e-33	8.80636e-33
MXLOC_017465	0.183601	1.03229e-12	7.12424e-13
MXLOC_015449	-1.52006	2.09643e-218	9.89757e-218
MXLOC_009644	-0.0126178	0.308443	0.0743409
MXLOC_000619	0.228901	3.49217e-11	2.25318e-11
MXLOC_008288	-0.320373	2.82076e-43	4.01103e-43
MXLOC_019205	-0.119192	0.244185	0.0603661
MXLOC_000839	0.230658	1.48499e-10	9.29225e-11
MXLOC_002950	-0.264177	1.55853e-50	2.45111e-50
MXLOC_000805	0.642716	3.64872e-40	4.94698e-40
MXLOC_000898	0.204423	0.00807598	0.00265432
MXLOC_018970	0.384097	0.000174006	7.09213e-05
MXLOC_018594	0.527522	8.3479e-11	5.29473e-11
MXLOC_008041	0.599519	9.2462e-08	4.93168e-08
MXLOC_011968	-0.0716577	0.152935	0.0397296
MXLOC_015465	4.05762	0.00501751	0.00170578
MXLOC_011618	0.881528	4.69415e-19	4.01149e-19
MXLOC_020520	-0.218258	2.14656e-08	1.19301e-08
MXLOC_019830	-0.194837	9.03585e-10	5.43466e-10
MXLOC_020177	-0.322459	1.62128e-12	1.10999e-12
MXLOC_011513	-0.759742	0.0199472	0.00614939
MXLOC_018117	-0.126771	6.32558e-05	2.69437e-05
MXLOC_013083	-0.261119	3.78595e-13	2.66237e-13
MXLOC_018492	-1.05767	1.82994e-38	2.4155e-38
MXLOC_000176	-2.45926	0	0
MXLOC_008433	1.21893	8.14975e-97	2.04196e-96
MXLOC_003459	-1.45142	1.00068e-29	1.12469e-29
MXLOC_007313	-0.386961	0.00550218	0.00186125
MXLOC_014571	-1.02468	5.13933e-47	7.70639e-47
MXLOC_016651	-0.560938	9.08636e-14	6.53236e-14
MXLOC_010942	-0.854825	1.44034e-117	4.16028e-117
MXLOC_009330	1.0348	4.15408e-39	5.53257e-39
MXLOC_002026	-0.243051	0.293299	0.0710617
MXLOC_015934	0.156644	0.000306834	0.000121864
MXLOC_017369	0.56665	3.33927e-05	1.46034e-05
MXLOC_007895	0.178171	1.37425e-05	6.21249e-06
MXLOC_015121	-0.00628149	0.936869	0.193805
MXLOC_010592	0.622836	2.4286e-14	1.77808e-14
MXLOC_003104	0.55093	1.44761e-43	2.07109e-43
MXLOC_017755	0.117848	4.23941e-14	3.07717e-14
MXLOC_002971	0.911119	0.000324413	0.000128377
MXLOC_019015	-0.306326	7.69645e-06	3.55243e-06
MXLOC_018229	-0.0268265	0.88093	0.184683
MXLOC_019246	-0.192314	2.45256e-13	1.73567e-13
MXLOC_014002	-0.818494	7.60044e-05	3.21085e-05
MXLOC_009045	0.265133	4.23991e-17	3.39904e-17
MXLOC_011295	0.0691373	0.191426	0.0485541
MXLOC_014507	-0.483035	4.15109e-07	2.11149e-07
MXLOC_003058	-0.738481	3.48292e-55	5.8257e-55
MXLOC_017113	0.0112713	0.692946	0.150814
MXLOC_000340	0.280095	0.184458	0.0469937
MXLOC_010532	-0.06848	0.577962	0.129106
MXLOC_000393	0.688357	1.72449e-120	5.07382e-120
MXLOC_008685	-0.172468	0.0393315	0.0114768
MXLOC_005851	-0.0927469	0.143233	0.0374439
MXLOC_000821	-0.556436	2.62118e-121	7.75869e-121
MXLOC_016938	-0.904166	6.01419e-35	7.47893e-35
MXLOC_007753	-0.42655	4.69002e-28	5.10032e-28
MXLOC_021548	0.292771	3.80069e-05	1.65386e-05
MXLOC_008464	-0.435236	3.88099e-06	1.83724e-06
MXLOC_008351	-0.0345393	0.000195347	7.92172e-05
MXLOC_008928	-3.22807	0	0
MXLOC_003367	10.0865	1.73962e-87	4.00985e-87
MXLOC_021566	-0.315027	0.00318366	0.0011131
MXLOC_014532	-0.0265019	0.450655	0.103955
MXLOC_020739	0.0188493	0.816648	0.173044
MXLOC_000040	0.0302897	0.484914	0.110879
MXLOC_021104	-0.341471	5.00773e-10	3.05242e-10
MXLOC_016311	0.379401	1.29467e-29	1.45346e-29
MXLOC_000550	-1.7419	0	0
MXLOC_020384	-0.532625	0.00102704	0.000384392
MXLOC_008524	-0.204187	4.15621e-08	2.2667e-08
MXLOC_015445	-0.811997	1.39627e-16	1.10043e-16
MXLOC_013069	-0.496046	5.06091e-09	2.92118e-09
MXLOC_009504	0.419637	9.07432e-05	3.80103e-05
MXLOC_007029	1.2566	1.51283e-07	7.94697e-08
MXLOC_020394	1.23564	9.49512e-09	5.39225e-09
MXLOC_007292	0.666588	5.15389e-87	1.18186e-86
MXLOC_015551	-0.990959	1.11154e-05	5.05988e-06
MXLOC_008654	0.94448	1.81218e-11	1.1858e-11
MXLOC_008895	-0.117855	0.00556741	0.00188227
MXLOC_011697	0.166813	2.53062e-08	1.39963e-08
MXLOC_010146	-0.752952	7.24291e-06	3.35099e-06
MXLOC_020615	-0.208624	1.10249e-20	9.92213e-21
MXLOC_007799	2.70551	6.35505e-183	2.6412e-182
MXLOC_000714	0.34285	1.27758e-143	4.34665e-143
MXLOC_007484	0.171113	2.75263e-41	3.7834e-41
MXLOC_017610	0.271857	0.0331619	0.00982188
MXLOC_001141	-0.209368	3.98452e-06	1.88279e-06
MXLOC_006315	1.09562	4.79169e-139	1.59154e-138
MXLOC_004980	-0.0435339	0.0776791	0.0214353
MXLOC_011755	0.0689546	0.0540949	0.0153611
MXLOC_000946	0.064015	0.18791	0.0477714
MXLOC_011201	-0.20825	2.59447e-05	1.14475e-05
MXLOC_015322	-0.257013	2.53685e-22	2.38801e-22
MXLOC_017375	-0.278704	7.81442e-48	1.1852e-47
MXLOC_004848	0.49402	0.000158541	6.48772e-05
MXLOC_000211	0.109591	1.328e-12	9.12262e-13
MXLOC_011739	0.00714496	0.926575	0.192113
MXLOC_017121	0.192726	0.0029905	0.00104893
MXLOC_017139	0.579254	1.34929e-96	3.37381e-96
MXLOC_002960	0.439409	3.95102e-08	2.15778e-08
MXLOC_006253	0.266623	0.00894173	0.00291771
MXLOC_003672	0.369439	0.529386	0.119691
MXLOC_010681	0.116226	0.473469	0.108583
MXLOC_008933	0.0288424	0.800933	0.170171
MXLOC_014916	-0.61568	1.01236e-06	5.01553e-07
MXLOC_020539	-0.690597	5.55945e-43	7.86426e-43
MXLOC_011346	-0.188432	5.46711e-09	3.14859e-09
MXLOC_013387	-0.0592751	0.0772264	0.0213152
MXLOC_005502	0.719731	9.3159e-13	6.44107e-13
MXLOC_012586	-0.783871	4.92148e-19	4.19916e-19
MXLOC_014779	0.267076	3.64204e-07	1.86107e-07
MXLOC_020408	0.119519	3.88491e-08	2.12228e-08
MXLOC_014172	-0.186588	0.426872	0.0991648
MXLOC_017146	-7.10261	1.39454e-17	1.1381e-17
MXLOC_009339	2.57966	2.96277e-07	1.5235e-07
MXLOC_005962	-0.259865	1.09256e-11	7.22156e-12
MXLOC_016705	-0.782593	3.17716e-17	2.55795e-17
MXLOC_013625	0.0761512	0.0533173	0.0151596
MXLOC_021109	-0.448408	1.66095e-05	7.44735e-06
MXLOC_006575	-2.14166	1.60747e-13	1.14555e-13
MXLOC_017873	2.07815	7.00275e-65	1.31812e-64
MXLOC_004348	-1.05951	4.45092e-196	1.95611e-195
MXLOC_009265	1.11292	2.49247e-161	9.3293e-161
MXLOC_002675	-0.412179	7.79477e-11	4.94967e-11
MXLOC_011630	-0.413582	3.09277e-13	2.18275e-13
MXLOC_009999	0.0365161	0.654233	0.143588
MXLOC_005883	-0.335785	1.80447e-11	1.18123e-11
MXLOC_008865	0.0384798	0.110986	0.0296404
MXLOC_003133	-0.213257	0.0216977	0.00664177
MXLOC_010644	-0.462241	1.55695e-43	2.22557e-43
MXLOC_002895	-0.311541	2.8529e-61	5.13694e-61
MXLOC_010155	-0.0213326	0.795186	0.169153
MXLOC_006232	0.770437	0.0151602	0.00476852
MXLOC_000706	-0.260257	6.33711e-23	6.06441e-23
MXLOC_000282	-0.596958	0.0108303	0.0034923
MXLOC_016766	-0.116043	0.00198786	0.000713874
MXLOC_009563	0.297756	5.1892e-06	2.42836e-06
MXLOC_013372	0.580751	0.0157189	0.00493441
MXLOC_012115	-0.260157	2.5175e-20	2.24096e-20
MXLOC_019759	0.200258	0.450052	0.10383
MXLOC_004702	-0.937616	2.02487e-07	1.05339e-07
MXLOC_018050	2.92635	4.88752e-18	4.04608e-18
MXLOC_005674	1.54406	1.72357e-15	1.31193e-15
MXLOC_018202	-0.653594	1.46129e-19	1.27006e-19
MXLOC_008050	0.973373	4.42819e-115	1.26265e-114
MXLOC_006134	-0.169909	1.49257e-34	1.84204e-34
MXLOC_018565	-0.656042	6.10996e-10	3.70766e-10
MXLOC_004664	0.0959027	7.91649e-07	3.94764e-07
MXLOC_016891	-0.270364	4.08472e-13	2.86753e-13
MXLOC_018564	-0.414565	1.55672e-08	8.72418e-09
MXLOC_008919	0.153855	1.61508e-09	9.58797e-10
MXLOC_021713	-0.0239468	0.776805	0.165742
MXLOC_000461	-0.246083	4.0829e-06	1.9276e-06
MXLOC_013146	0.147362	0.000557365	0.000214966
MXLOC_021736	-0.952535	3.19161e-296	1.97293e-295
MXLOC_006289	-0.716506	4.8046e-42	6.68444e-42
MXLOC_008746	-0.415139	0	0
MXLOC_008594	-0.00505604	0.870617	0.182889
MXLOC_009546	-0.0969667	0.249452	0.0615687
MXLOC_014441	-1.0481	5.46881e-85	1.23498e-84
MXLOC_011243	-0.0145574	0.537166	0.121064
MXLOC_000078	2.91089	0	0
MXLOC_016208	0.441529	1.3719e-05	6.20355e-06
MXLOC_002048	0.678487	2.94897e-08	1.6244e-08
MXLOC_018438	-2.87747	3.26422e-14	2.37885e-14
MXLOC_002498	-0.383723	6.27805e-22	5.84897e-22
MXLOC_010633	0.247588	0.614993	0.136129
MXLOC_002329	-0.0581011	0.395792	0.092768
MXLOC_014439	0.386889	7.22126e-42	1.00239e-41
MXLOC_008007	-0.829751	4.57634e-13	3.20438e-13
MXLOC_019034	0.457075	5.54372e-16	4.29178e-16
MXLOC_005823	0.376801	1.39931e-189	5.98848e-189
MXLOC_006081	-0.498074	6.63296e-103	1.73565e-102
MXLOC_013606	-1.79325	1.95635e-26	2.0457e-26
MXLOC_003738	0.333062	0.00747828	0.00247298
MXLOC_018617	-0.00613872	0.983189	0.201403
MXLOC_007450	-0.498733	3.66642e-15	2.75691e-15
MXLOC_006509	6.26983	2.00111e-10	1.24503e-10
MXLOC_010227	-1.00604	3.24005e-11	2.09548e-11
MXLOC_004231	-0.338248	0.0361951	0.0106347
MXLOC_008724	-0.210552	1.90587e-11	1.24544e-11
MXLOC_017577	0.702422	3.03052e-166	1.16368e-165
MXLOC_006239	0.0182884	0.338186	0.0807228
MXLOC_006853	-0.616543	2.85554e-48	4.35931e-48
MXLOC_006628	-0.0649435	2.01083e-06	9.75305e-07
MXLOC_010337	1.40863	2.28365e-231	1.13391e-230
MXLOC_018579	-0.155134	0.0257899	0.00777598
MXLOC_008032	-1.54937	3.34336e-10	2.05454e-10
MXLOC_019149	-0.130711	0.0362874	0.0106599
MXLOC_012575	-0.0668936	0.657879	0.144188
MXLOC_008081	-0.104657	0.00159399	0.000581861
MXLOC_001603	7.27845	1.43133e-18	1.20384e-18
MXLOC_000097	-0.266015	0.000692375	0.000263636
MXLOC_016149	-0.274916	4.99532e-52	8.01583e-52
MXLOC_015174	-0.316281	3.59343e-70	7.13997e-70
MXLOC_002953	-0.860724	5.12366e-11	3.28075e-11
MXLOC_008026	4.57801	0.000531195	0.000205325
MXLOC_008396	1.41257	4.04836e-10	2.47783e-10
MXLOC_016536	-0.0248851	0.051254	0.0146239
MXLOC_011148	0.583163	8.3635e-11	5.30394e-11
MXLOC_014388	-1.29041	1.0649e-286	6.40491e-286
MXLOC_021643	0.0497479	0.303982	0.0733524
MXLOC_015052	0.0346539	0.884471	0.185298
MXLOC_001683	0.0910375	7.89586e-14	5.68735e-14
MXLOC_014961	0.718394	0	0
MXLOC_015028	1.61543	0	0
MXLOC_001719	-0.652711	5.99718e-40	8.10637e-40
MXLOC_017561	-0.560698	3.4837e-37	4.50255e-37
MXLOC_011675	-5.53846	3.8619e-07	1.9693e-07
MXLOC_003512	-0.346066	1.54027e-09	9.16047e-10
MXLOC_017439	-6.19579	1.97748e-10	1.23048e-10
MXLOC_012816	-0.230424	0.00845631	0.00277132
MXLOC_018901	-0.148224	0.162089	0.0418987
MXLOC_014520	-0.516452	0.00181178	0.000654915
MXLOC_017060	0.594271	8.05278e-11	5.11152e-11
MXLOC_003883	0.396752	0.00861378	0.00281784
MXLOC_000221	0.000266313	0.995839	0.203543
MXLOC_000081	-0.56841	4.15527e-10	2.54136e-10
MXLOC_000869	-1.32473	7.95127e-63	1.46292e-62
MXLOC_001251	0.045531	0.081476	0.0223645
MXLOC_006168	0.0734559	0.53888	0.121423
MXLOC_007804	-3.28101	2.48117e-05	1.09723e-05
MXLOC_009651	0.04227	0.722214	0.156149
MXLOC_015376	-0.557186	9.31788e-116	2.66621e-115
MXLOC_010208	-0.436051	2.14549e-76	4.49464e-76
MXLOC_006145	0.673437	4.68036e-181	1.92882e-180
MXLOC_015265	-0.543218	0.042255	0.0122606
MXLOC_017124	0.197607	5.03391e-14	3.64412e-14
MXLOC_004769	-0.336433	0.142746	0.0373265
MXLOC_011340	-0.688694	0.00108179	0.000403617
MXLOC_007140	-0.124721	1.56874e-30	1.7907e-30
MXLOC_011993	-0.289314	3.60092e-12	2.42865e-12
MXLOC_015342	0.377128	2.24601e-06	1.08625e-06
MXLOC_005965	-0.214737	0.000291563	0.000116025
MXLOC_019846	-1.00736	3.71637e-16	2.89265e-16
MXLOC_002067	2.00419	4.98074e-109	1.36229e-108
MXLOC_001228	0.0650242	0.282067	0.0686429
MXLOC_009102	-0.0917304	0.530315	0.119836
MXLOC_008800	-1.04336	0.00236622	0.000841722
MXLOC_009165	0.320371	1.50864e-24	1.50797e-24
MXLOC_004373	0.230305	2.32578e-13	1.64713e-13
MXLOC_016090	-0.836266	0	0
MXLOC_009252	0.98419	0	0
MXLOC_000384	0.171855	8.10698e-06	3.73628e-06
MXLOC_000667	0.151817	8.88675e-06	4.07761e-06
MXLOC_006381	-0.161852	1.33706e-61	2.42177e-61
MXLOC_010878	-1.05808	2.16203e-09	1.27376e-09
MXLOC_016983	0.12709	0.031205	0.00928046
MXLOC_002546	-0.156012	0.127048	0.0335404
MXLOC_010574	-0.422945	0.0747177	0.0206756
MXLOC_012239	0.971906	1.4848e-27	1.59416e-27
MXLOC_001322	0.198207	4.81857e-41	6.60997e-41
MXLOC_004276	0.104762	0.596114	0.132511
MXLOC_001728	-1.20461	5.10896e-41	7.00439e-41
MXLOC_019825	-0.177407	0.00401783	0.00138448
MXLOC_012803	-0.333595	2.3081e-05	1.02319e-05
MXLOC_011255	0.0434625	0.0111494	0.0035881
MXLOC_007560	-8.02022	1.32007e-29	1.48129e-29
MXLOC_018636	-0.0608983	0.602642	0.133813
MXLOC_017836	-0.505337	2.12005e-06	1.02716e-06
MXLOC_014743	-0.481022	8.11064e-177	3.27898e-176
MXLOC_010193	-1.26811	7.62244e-08	4.0852e-08
MXLOC_016339	-0.279814	6.27892e-79	1.34473e-78
MXLOC_002713	-0.0953391	0.00197679	0.000710005
MXLOC_016510	0.0517735	0.000409493	0.000160193
MXLOC_004252	0.291019	2.37307e-39	3.17784e-39
MXLOC_013727	-0.124871	0.118844	0.0315618
MXLOC_015569	0.981024	1.04181e-11	6.89358e-12
MXLOC_005830	1.2958	6.61846e-16	5.11329e-16
MXLOC_002694	-1.88696	8.17816e-60	1.44441e-59
MXLOC_003048	0.569295	2.08174e-229	1.01919e-228
MXLOC_011364	0.346288	0.0225779	0.00688839
MXLOC_020100	-0.137058	0.408096	0.0952533
MXLOC_016611	0.421548	3.86801e-05	1.68196e-05
MXLOC_017077	1.27579	0	0
MXLOC_017718	-0.291208	2.14088e-09	1.26176e-09
MXLOC_009821	-0.321746	1.37878e-09	8.21302e-10
MXLOC_006809	-0.189927	0.000975677	0.000366092
MXLOC_020192	0.356299	2.86679e-14	2.09389e-14
MXLOC_005751	-0.24897	0.0709325	0.0197125
MXLOC_018388	-0.322793	3.35287e-08	1.83985e-08
MXLOC_010854	-1.12165	2.01309e-63	3.72761e-63
MXLOC_000813	-0.968747	1.71625e-118	4.98665e-118
MXLOC_005020	3.95182	0.00729418	0.00241569
MXLOC_012336	0.140135	3.7211e-16	2.89587e-16
MXLOC_003812	-0.537221	1.34977e-42	1.89674e-42
MXLOC_011433	-0.589598	0	0
MXLOC_011521	0.264608	6.3003e-36	7.96418e-36
MXLOC_017127	-0.26852	2.93929e-09	1.71906e-09
MXLOC_020410	-0.5736	6.52331e-20	5.73686e-20
MXLOC_007798	0.163728	0.405571	0.0947786
MXLOC_020058	-0.483014	5.40576e-09	3.11435e-09
MXLOC_000883	-0.519963	2.54602e-29	2.84068e-29
MXLOC_009292	-0.423499	0.0205666	0.00632399
MXLOC_014811	0.273763	0.00163257	0.000594879
MXLOC_018770	-0.118692	0.00131165	0.000484432
MXLOC_002305	-8.37124	4.88341e-36	6.19068e-36
MXLOC_018513	-0.318835	5.18123e-18	4.28778e-18
MXLOC_011973	-0.539878	9.20372e-08	4.91064e-08
MXLOC_004996	0.370385	3.92047e-06	1.85485e-06
MXLOC_005520	-0.375309	1.42998e-27	1.53597e-27
MXLOC_008997	-0.181478	6.61821e-24	6.50637e-24
MXLOC_003799	0.18188	0.600178	0.133344
MXLOC_011660	1.23467	5.72206e-65	1.07955e-64
MXLOC_000524	0.920236	1.01851e-12	7.03113e-13
MXLOC_000495	0.564931	0.696699	0.151476
MXLOC_018318	0.155009	2.87825e-07	1.48113e-07
MXLOC_019057	0.498713	5.76166e-13	4.01826e-13
MXLOC_015789	-0.728975	1.55277e-50	2.44362e-50
MXLOC_012223	-0.298068	1.09144e-08	6.17319e-09
MXLOC_004438	-1.13558	0.0196345	0.00606251
MXLOC_005265	0.152907	0.00540224	0.00182857
MXLOC_003253	0.448723	1.25572e-41	1.7347e-41
MXLOC_016459	-0.388455	1.16986e-08	6.59997e-09
MXLOC_013852	0.747005	1.72522e-32	2.05458e-32
MXLOC_009225	-0.202589	5.97761e-06	2.78427e-06
MXLOC_008200	0.150513	0.113106	0.0301376
MXLOC_016714	0.417254	8.9302e-09	5.08146e-09
MXLOC_002730	-0.413208	8.24948e-06	3.79873e-06
MXLOC_009926	0.270627	3.40449e-10	2.09158e-10
MXLOC_017905	-1.3096	0.000377512	0.000148465
MXLOC_014504	0.336527	1.8506e-07	9.65602e-08
MXLOC_002493	-0.402224	0.00675056	0.00224843
MXLOC_021105	-0.328486	0.000817838	0.0003095
MXLOC_011040	-0.202494	1.62623e-27	1.74256e-27
MXLOC_019736	-0.27386	0.0127357	0.00404621
MXLOC_014689	0.21631	6.30335e-19	5.36606e-19
MXLOC_011320	-0.453733	5.03328e-102	1.30728e-101
MXLOC_002917	-1.65776	4.63236e-09	2.68235e-09
MXLOC_001065	0.0271791	0.516321	0.117151
MXLOC_010789	-0.991945	0	0
MXLOC_020144	-1.07024	3.37848e-05	1.47657e-05
MXLOC_004651	0.623571	2.35172e-125	7.1647e-125
MXLOC_010353	0.147755	4.70526e-05	2.03034e-05
MXLOC_017964	0.445473	1.08506e-22	1.03211e-22
MXLOC_002799	0.27436	0.0524664	0.014942
MXLOC_013981	2.17542	0	0
MXLOC_007412	0.0658761	0.00212167	0.000758812
MXLOC_001857	0.175607	4.70418e-07	2.38564e-07
MXLOC_003041	-0.511355	3.70927e-10	2.27427e-10
MXLOC_003659	-1.25433	9.3073e-17	7.38407e-17
MXLOC_015728	-3.2812	0.0419949	0.0121989
MXLOC_001948	0.826037	2.29823e-147	7.9238e-147
MXLOC_020693	-0.85325	0.00371793	0.00128766
MXLOC_011659	-0.434214	2.2166e-19	1.91059e-19
MXLOC_015210	-0.273623	3.81365e-21	3.4821e-21
MXLOC_016764	-0.265974	4.9614e-60	8.79762e-60
MXLOC_011087	0.204585	3.54759e-09	2.0662e-09
MXLOC_015005	0.235113	0.0152399	0.00479175
MXLOC_006762	-0.657186	6.40276e-09	3.67318e-09
MXLOC_009370	0.082915	0.0050688	0.00172214
MXLOC_018175	-1.04359	1.2671e-12	8.7128e-13
MXLOC_020483	-0.612123	5.22957e-08	2.8366e-08
MXLOC_018054	-0.544092	3.35038e-58	5.79814e-58
MXLOC_018326	0.155412	1.40303e-05	6.33614e-06
MXLOC_010190	-0.685254	1.82916e-09	1.08273e-09
MXLOC_017502	-0.361371	9.53016e-11	6.02119e-11
MXLOC_010323	-0.720985	8.00689e-27	8.44838e-27
MXLOC_003021	-0.935352	5.61391e-26	5.80706e-26
MXLOC_002653	0.122497	7.811e-22	7.25644e-22
MXLOC_007397	1.40836	1.20174e-30	1.37498e-30
MXLOC_005287	-0.290324	8.46457e-27	8.92361e-27
MXLOC_010398	0.137813	0.0795687	0.021895
MXLOC_018369	-0.251316	5.95989e-07	3.00161e-07
MXLOC_010124	0.479104	9.20285e-17	7.30239e-17
MXLOC_010626	-0.521112	0.388446	0.0912383
MXLOC_004815	-0.00173923	0.995623	0.203542
MXLOC_008721	-0.14516	0.164424	0.0424307
MXLOC_012264	0.103066	0.0868365	0.0237083
MXLOC_000595	-0.523093	1.01423e-10	6.39558e-11
MXLOC_005696	0.403512	4.99851e-131	1.57883e-130
MXLOC_015207	-0.292654	3.07219e-10	1.89266e-10
MXLOC_019146	0.546647	4.88305e-11	3.12915e-11
MXLOC_002050	-0.714496	3.49021e-13	2.45863e-13
MXLOC_002613	2.62629	0	0
MXLOC_011266	0.0941424	0.00209319	0.000749392
MXLOC_003543	0.46411	9.44534e-25	9.47989e-25
MXLOC_015152	-0.052921	0.667981	0.146114
MXLOC_002227	1.61327	0	0
MXLOC_013378	0.27647	0.00190021	0.000684205
MXLOC_002394	-5.48186	6.53398e-07	3.28096e-07
MXLOC_002209	0.47107	3.5994e-169	1.40192e-168
MXLOC_018904	0.181972	2.79276e-42	3.90432e-42
MXLOC_011092	-0.222597	1.22809e-13	8.78e-14
MXLOC_016262	-0.209047	1.27981e-125	3.9112e-125
MXLOC_003334	0.666619	0	0
MXLOC_011694	-7.44878	2.00061e-21	1.84214e-21
MXLOC_016316	-0.721096	0.0702744	0.0195451
MXLOC_019157	0.0385451	0.739971	0.159257
MXLOC_014396	-0.297831	0.0759225	0.0209837
MXLOC_010656	-0.718407	1.75075e-18	1.46846e-18
MXLOC_020659	-0.322248	3.94374e-33	4.73931e-33
MXLOC_002526	0.24055	0.0702566	0.0195424
MXLOC_000827	0.0785597	0.0229979	0.00700591
MXLOC_005261	-0.558388	5.93072e-15	4.43363e-15
MXLOC_020654	-1.67452	1.26502e-11	8.3378e-12
MXLOC_000915	2.17671	0	0
MXLOC_021524	0.449544	0.00133238	0.000491455
MXLOC_008297	-1.01548	0.00921575	0.00300252
MXLOC_018034	-1.07433	1.2285e-05	5.57572e-06
MXLOC_006656	0.12552	0.241548	0.0597988
MXLOC_000407	0.279688	0.00344221	0.00119751
MXLOC_001416	-0.436126	1.15879e-23	1.13126e-23
MXLOC_021072	-0.0381051	0.597405	0.132783
MXLOC_008779	-0.400937	4.84146e-25	4.89732e-25
MXLOC_012594	-0.420928	0.0166158	0.00519517
MXLOC_015269	0.066555	6.36969e-05	2.71292e-05
MXLOC_019527	2.41827	0	0
MXLOC_021123	0.341551	0.000232508	9.34968e-05
MXLOC_018333	0.495259	0.0012666	0.00046896
MXLOC_012158	7.72188	7.05431e-24	6.93231e-24
MXLOC_006730	0.120228	5.06749e-06	2.37276e-06
MXLOC_015313	-0.71102	2.32476e-22	2.19089e-22
MXLOC_020049	-0.362199	5.36647e-07	2.71195e-07
MXLOC_018646	-0.694203	4.80428e-13	3.36206e-13
MXLOC_004646	0.232538	0.0232977	0.00709199
MXLOC_006889	0.749422	7.98499e-53	1.29663e-52
MXLOC_011985	-0.310632	3.65399e-06	1.73296e-06
MXLOC_021396	-1.38544	3.55944e-162	1.3405e-161
MXLOC_009037	-0.700266	0.000998007	0.000373811
MXLOC_020184	-0.212502	8.72885e-20	7.64492e-20
MXLOC_019460	-0.398139	8.20089e-19	6.95845e-19
MXLOC_006492	-0.712526	0.00113759	0.000423533
MXLOC_014365	-0.525809	5.68448e-85	1.28309e-84
MXLOC_013959	-0.131713	0.356563	0.0845814
MXLOC_012242	-2.104	3.97885e-29	4.4182e-29
MXLOC_001244	0.285019	0.0658576	0.0184161
MXLOC_004092	-0.216738	1.42027e-19	1.23463e-19
MXLOC_001537	2.66779	9.21064e-300	5.73713e-299
MXLOC_008146	0.150884	0.00332766	0.00116079
MXLOC_020638	-0.848358	8.39227e-41	1.14769e-40
MXLOC_015949	1.34788	7.98685e-77	1.67893e-76
MXLOC_014719	-1.36859	2.07055e-26	2.16419e-26
MXLOC_011493	0.619501	1.75116e-05	7.83675e-06
MXLOC_011716	-0.552818	2.57891e-31	2.99264e-31
MXLOC_005305	0.0647163	0.626126	0.138219
MXLOC_013652	-0.948386	6.91718e-06	3.20574e-06
MXLOC_006725	-7.11018	1.16962e-17	9.56929e-18
MXLOC_020109	-0.105339	0.262269	0.0644134
MXLOC_000172	0.216107	8.14842e-55	1.35646e-54
MXLOC_004582	0.264741	0.00323532	0.00113019
MXLOC_013042	1.4328	8.00257e-09	4.56742e-09
MXLOC_019491	-2.54556	4.53518e-06	2.1327e-06
MXLOC_013470	-0.528614	6.87296e-262	3.79785e-261
MXLOC_002866	0.0102689	0.881136	0.18471
MXLOC_021125	-0.0237867	0.852911	0.179591
MXLOC_013639	-0.0867563	0.000132011	5.44257e-05
MXLOC_018235	-0.78481	5.89149e-12	3.9388e-12
MXLOC_000364	0.323214	6.42835e-75	1.33413e-74
MXLOC_021513	-0.725525	1.46943e-174	5.9065e-174
MXLOC_003095	-0.329394	4.81633e-14	3.4892e-14
MXLOC_014691	-0.416097	9.82254e-28	1.05924e-27
MXLOC_017979	-0.0413779	0.523077	0.11844
MXLOC_015853	3.55877	0	0
MXLOC_006235	-0.189111	2.81305e-12	1.90699e-12
MXLOC_012293	-1.53985	2.84527e-11	1.8443e-11
MXLOC_019220	0.285783	2.3136e-05	1.02553e-05
MXLOC_001678	-0.36346	8.81244e-18	7.2402e-18
MXLOC_018864	-0.366689	7.00081e-24	6.88112e-24
MXLOC_008716	0.424242	1.13549e-110	3.13546e-110
MXLOC_020964	0.285808	0.13808	0.0362011
MXLOC_002472	-0.534461	6.97109e-12	4.64345e-12
MXLOC_015828	-0.024097	0.567825	0.127161
MXLOC_015611	0.116872	0.00321457	0.00112358
MXLOC_013685	-0.333227	0.0711517	0.0197689
MXLOC_010392	0.409104	0.198368	0.0501668
MXLOC_009605	-0.125068	0.0404695	0.0117845
MXLOC_003287	0.541127	0.195958	0.0496163
MXLOC_012331	-0.171968	1.86755e-11	1.22154e-11
MXLOC_019288	-0.179123	7.31187e-07	3.65619e-07
MXLOC_016283	-0.49142	0.0116358	0.00372967
MXLOC_021332	0.878565	6.00602e-234	3.01895e-233
MXLOC_014740	0.166818	8.00291e-14	5.76191e-14
MXLOC_000679	0.387441	3.64006e-37	4.70215e-37
MXLOC_006325	-0.887576	0.0488381	0.0139843
MXLOC_012399	-0.676742	0.00172391	0.000625415
MXLOC_013388	-0.125111	0.0364714	0.0106979
MXLOC_004733	-0.111434	3.00507e-05	1.31902e-05
MXLOC_008857	-0.329387	8.9729e-05	3.76209e-05
MXLOC_005757	0.191712	1.67779e-17	1.36539e-17
MXLOC_010266	-0.201642	0.396216	0.0928627
MXLOC_003803	-0.597278	0.1105	0.0295203
MXLOC_008147	0.260878	7.46748e-95	1.83073e-94
MXLOC_008179	0.349785	8.20065e-42	1.13737e-41
MXLOC_021252	-0.000390546	0.992868	0.203063
MXLOC_002912	-0.0771157	0.151895	0.0394785
MXLOC_015405	-0.161327	0.000612881	0.000235062
MXLOC_020437	-0.2309	0.0878489	0.0239607
MXLOC_019141	0.332147	4.12815e-77	8.69281e-77
MXLOC_000137	-0.0225389	0.452041	0.10425
MXLOC_012978	3.15083	3.50264e-18	2.91342e-18
MXLOC_016451	0.16147	8.95322e-06	4.10542e-06
MXLOC_005608	-0.552373	0.139372	0.0365085
MXLOC_017120	-0.170552	0.414969	0.0966944
MXLOC_019598	0.903392	0	0
MXLOC_018556	-0.197867	1.47695e-05	6.65219e-06
MXLOC_013746	-0.0127178	0.898542	0.187698
MXLOC_006038	-0.100313	0.184432	0.0469896
MXLOC_020295	0.0175515	0.928191	0.192432
MXLOC_018076	-0.169747	2.05069e-11	1.33811e-11
MXLOC_018077	-1.14907	2.58243e-22	2.42998e-22
MXLOC_000204	0.200361	8.41132e-15	6.25653e-15
MXLOC_001550	0.0666221	0.0541921	0.0153878
MXLOC_014838	0.121665	0.0131954	0.00418222
MXLOC_020612	-0.239862	2.98408e-06	1.42727e-06
MXLOC_018533	-1.39684	1.56955e-102	4.09609e-102
MXLOC_004916	-0.455556	1.32066e-27	1.4201e-27
MXLOC_008584	-0.214861	1.94877e-22	1.83832e-22
MXLOC_008341	-0.295094	5.23943e-10	3.18849e-10
MXLOC_002921	-0.229083	2.14015e-108	5.83399e-108
MXLOC_015471	-1.71422	2.19861e-06	1.06417e-06
MXLOC_006951	-0.653707	6.21492e-36	7.85828e-36
MXLOC_011343	-0.318436	8.15743e-11	5.1766e-11
MXLOC_003022	-0.32276	2.72636e-17	2.2008e-17
MXLOC_005637	0.43985	0.0214746	0.00658419
MXLOC_003316	0.626967	3.83375e-14	2.78603e-14
MXLOC_017899	-0.0508379	0.160723	0.0415917
MXLOC_010104	0.113062	0.000142961	5.87471e-05
MXLOC_016755	0.0206668	0.964201	0.198294
MXLOC_011796	-0.667062	6.5105e-60	1.15195e-59
MXLOC_020032	0.392719	6.21564e-09	3.5696e-09
MXLOC_011570	-0.34318	2.57696e-06	1.24043e-06
MXLOC_014394	-0.588032	0.00362904	0.00125839
MXLOC_018309	1.70513	2.8884e-35	3.61204e-35
MXLOC_008388	-0.405929	0.25267	0.0622875
MXLOC_000746	0.0516661	0.108369	0.0290018
MXLOC_001536	0.695906	3.33575e-26	3.46884e-26
MXLOC_013736	-0.0572952	0.183596	0.0467961
MXLOC_008285	4.2234	0	0
MXLOC_017763	-0.894035	3.73764e-22	3.50285e-22
MXLOC_016706	-1.00158	2.39461e-124	7.21453e-124
MXLOC_020290	-0.322677	2.93759e-16	2.29487e-16
MXLOC_009317	0.0108156	0.794063	0.16896
MXLOC_008340	0.26048	5.93773e-23	5.68555e-23
MXLOC_021562	0.367574	0.0466909	0.0134134
MXLOC_013353	-0.458555	0.0395463	0.0115307
MXLOC_000738	0.765773	3.55789e-110	9.80791e-110
MXLOC_021690	-3.09354	1.03958e-31	1.21616e-31
MXLOC_008091	0.0884194	0.382856	0.0900679
MXLOC_011629	-0.0927689	0.00253619	0.00089788
MXLOC_008098	-0.162452	0.0612006	0.0172161
MXLOC_003971	-1.24304	4.29166e-51	6.80198e-51
MXLOC_014121	-4.56247	0.000414578	0.000162104
MXLOC_006577	-0.775011	7.03256e-13	4.88928e-13
MXLOC_011577	-1.07627	6.14611e-07	3.09095e-07
MXLOC_020470	0.578821	1.10268e-23	1.07755e-23
MXLOC_018601	-0.390479	1.96989e-13	1.39955e-13
MXLOC_008992	0.604704	8.02158e-249	4.24567e-248
MXLOC_018545	0.925074	0	0
MXLOC_007395	-0.776541	1.36925e-37	1.78099e-37
MXLOC_010291	-0.362999	6.98115e-20	6.13289e-20
MXLOC_011060	-0.340066	1.13733e-09	6.79628e-10
MXLOC_017183	-0.236407	1.41121e-16	1.11203e-16
MXLOC_002823	0.234681	0.00496791	0.00169033
MXLOC_021722	-0.816206	8.24365e-14	5.93349e-14
MXLOC_013433	0.57844	1.0453e-12	7.21303e-13
MXLOC_003329	0.506488	0.000281924	0.00011238
MXLOC_002979	-0.221815	2.13648e-13	1.5157e-13
MXLOC_007034	0.357879	0.000186582	7.58388e-05
MXLOC_006851	0.949093	2.6323e-09	1.54376e-09
MXLOC_020060	-0.153019	1.36733e-05	6.18576e-06
MXLOC_008576	-0.425667	1.99128e-13	1.41454e-13
MXLOC_016631	-0.792227	0.00484533	0.00165057
MXLOC_014073	-0.153327	0.267885	0.0656385
MXLOC_000260	-0.0126706	0.827978	0.175119
MXLOC_016096	0.357171	7.44322e-09	4.25761e-09
MXLOC_001343	-0.544371	6.92697e-05	2.93851e-05
MXLOC_013570	0.890818	5.40671e-07	2.73144e-07
MXLOC_017461	0.757515	4.38453e-23	4.21811e-23
MXLOC_017943	0.248141	7.63594e-17	6.06987e-17
MXLOC_016301	0.0828775	8.28368e-07	4.12612e-07
MXLOC_007830	0.147829	9.5913e-133	3.07716e-132
MXLOC_007087	0.4426	0.000317099	0.000125645
MXLOC_021101	-0.700385	9.32314e-19	7.89563e-19
MXLOC_015770	-0.927882	9.66782e-13	6.67967e-13
MXLOC_015592	-0.489266	4.39028e-09	2.5467e-09
MXLOC_016403	-0.199466	1.2305e-12	8.47065e-13
MXLOC_004977	0.594155	8.94668e-05	3.75206e-05
MXLOC_014931	-0.183361	2.7415e-51	4.35919e-51
MXLOC_011816	-0.119037	9.18051e-18	7.53754e-18
MXLOC_002542	0.294292	8.87105e-152	3.14492e-151
MXLOC_000880	-0.597967	6.67526e-08	3.59171e-08
MXLOC_008451	4.39837	0.00125295	0.000463977
MXLOC_018171	-0.101499	0.404365	0.0945465
MXLOC_005295	0.877808	1.98214e-160	7.35728e-160
MXLOC_017192	-2.3269	6.05003e-27	6.40433e-27
MXLOC_010076	-0.994311	1.22972e-06	6.05686e-07
MXLOC_017272	-0.115159	1.20934e-71	2.43152e-71
MXLOC_004196	-0.8534	1.88174e-87	4.33538e-87
MXLOC_017534	-0.146762	4.73768e-05	2.04379e-05
MXLOC_000333	-0.127278	0.000112378	4.66299e-05
MXLOC_007995	-1.30166	1.83005e-09	1.08313e-09
MXLOC_011480	0.215622	0.0235798	0.00715969
MXLOC_019243	0.28568	9.15446e-17	7.26517e-17
MXLOC_005852	-0.185895	0.0133306	0.00422342
MXLOC_008965	9.31167	1.19272e-57	2.0525e-57
MXLOC_017373	-0.255788	1.13718e-06	5.61464e-07
MXLOC_008988	-0.311358	3.50077e-23	3.37586e-23
MXLOC_012021	-0.0265139	0.189031	0.0480288
MXLOC_009494	-0.348416	1.44441e-05	6.511e-06
MXLOC_013003	-0.0568459	0.0710321	0.0197368
MXLOC_000520	-1.32231	2.19146e-119	6.40159e-119
MXLOC_004520	-0.552608	7.81795e-111	2.16123e-110
MXLOC_008429	-5.86664	1.26298e-08	7.11303e-09
MXLOC_016795	-7.26524	2.69365e-19	2.31892e-19
MXLOC_021778	-8.80323	8.52691e-46	1.25629e-45
MXLOC_016922	2.79747	8.79734e-05	3.69354e-05
MXLOC_003044	-0.754554	5.45607e-54	8.99699e-54
MXLOC_015176	-0.215114	7.8526e-10	4.73929e-10
MXLOC_021533	0.140189	0.00636398	0.00213152
MXLOC_005630	-0.0901392	1.22098e-08	6.88283e-09
MXLOC_008956	0.242276	5.57516e-08	3.01737e-08
MXLOC_015750	-1.36876	6.55879e-06	3.04541e-06
MXLOC_013391	-0.122366	2.39425e-39	3.20445e-39
MXLOC_002974	0.158378	0.664176	0.145379
MXLOC_013011	0.296786	4.54462e-05	1.96318e-05
MXLOC_012058	0.0938646	0.0682471	0.0190418
MXLOC_015198	0.248548	1.67899e-27	1.79831e-27
MXLOC_009744	0.0901492	0.0115307	0.00369865
MXLOC_021342	1.10065	1.08598e-33	1.31865e-33
MXLOC_010074	2.44875	0	0
MXLOC_000823	2.80662	9.85692e-16	7.56869e-16
MXLOC_016204	-0.916316	1.37816e-106	3.70524e-106
MXLOC_006317	-0.417523	0.18957	0.0481358
MXLOC_012950	-1.10266	6.6181e-119	1.92864e-118
MXLOC_011150	-0.293734	1.5412e-29	1.72705e-29
MXLOC_013087	0.20912	0.109386	0.02925
MXLOC_009281	-1.03076	1.71609e-09	1.0174e-09
MXLOC_008910	-0.869827	1.38127e-21	1.27691e-21
MXLOC_017646	-0.142386	0.103399	0.0277869
MXLOC_000111	-0.0724018	0.0247985	0.00749951
MXLOC_017390	-0.540859	0.224109	0.0559425
MXLOC_018969	-0.363184	0.00187635	0.000676162
MXLOC_007837	1.6389	4.90611e-27	5.2058e-27
MXLOC_000755	-1.65366	1.08386e-19	9.45214e-20
MXLOC_008886	0.442596	6.65863e-185	2.80548e-184
MXLOC_009547	0.427576	0.00427799	0.00147009
MXLOC_009950	-4.00986	1.17986e-64	2.21404e-64
MXLOC_002860	-0.447473	4.41531e-56	7.47722e-56
MXLOC_018268	-0.682117	6.54759e-07	3.28712e-07
MXLOC_003469	0.803482	0.000104165	4.33654e-05
MXLOC_013158	-0.673749	3.59984e-08	1.97117e-08
MXLOC_001284	-0.132288	2.5703e-07	1.32782e-07
MXLOC_014693	0.0133306	0.924326	0.191814
MXLOC_012269	-0.400348	0.0235075	0.00713907
MXLOC_013364	0.158155	0.099104	0.0267318
MXLOC_017739	1.3905	0.00382627	0.00132294
MXLOC_015800	-0.39812	1.73166e-08	9.67913e-09
MXLOC_014817	0.602553	0	0
MXLOC_015702	-0.203476	2.00552e-25	2.0494e-25
MXLOC_000515	0.30747	4.93291e-13	3.4506e-13
MXLOC_004274	0.0113747	0.887221	0.185779
MXLOC_013237	0.0253957	0.760008	0.162619
MXLOC_008929	-0.394185	0.0389853	0.0113834
MXLOC_014100	-0.402629	1.52481e-07	8.00648e-08
MXLOC_007731	0.496846	0.205033	0.0516869
MXLOC_007247	0.054957	0.0760029	0.0209988
MXLOC_017039	-0.0180474	0.736159	0.158555
MXLOC_015480	4.00191	0.00612905	0.00205851
MXLOC_004805	0.304752	4.72118e-06	2.21697e-06
MXLOC_004574	-0.196217	0.00464444	0.00158644
MXLOC_009510	-1.97851	2.25095e-07	1.16827e-07
MXLOC_019153	0.0998738	0.42538	0.0988463
MXLOC_000890	0.319149	0.0363895	0.0106886
MXLOC_011093	-0.279768	2.67571e-11	1.73577e-11
MXLOC_017516	-0.493274	5.04965e-72	1.02116e-71
MXLOC_021279	1.54963	2.3177e-09	1.3635e-09
MXLOC_015557	-3.88693	6.98638e-11	4.44615e-11
MXLOC_011128	-1.89387	0	0
MXLOC_002951	-0.528117	7.12178e-13	4.94991e-13
MXLOC_015822	-0.542543	3.23357e-07	1.65805e-07
MXLOC_020409	-0.374669	2.40219e-24	2.387e-24
MXLOC_002288	-0.546392	3.25872e-20	2.89235e-20
MXLOC_012776	0.47836	5.20423e-14	3.7652e-14
MXLOC_018346	0.518602	3.38269e-06	1.60975e-06
MXLOC_006480	0.0132247	0.877709	0.184102
MXLOC_011628	1.4315	4.85981e-58	8.39847e-58
MXLOC_019163	-0.46828	1.02656e-11	6.79359e-12
MXLOC_007564	-1.24989	7.37238e-11	4.68328e-11
MXLOC_013181	-0.216177	0	0
MXLOC_000024	-0.169827	0.258815	0.0636711
MXLOC_006582	-0.222681	3.29053e-26	3.42327e-26
MXLOC_019644	-0.322193	6.04026e-05	2.57755e-05
MXLOC_014141	-0.09424	0.313143	0.0753624
MXLOC_012116	0.000604	0.977345	0.200374
MXLOC_012387	-0.111774	0.298144	0.0721001
MXLOC_018607	-0.564571	8.90948e-56	1.50256e-55
MXLOC_002531	-0.777952	1.82464e-73	3.73928e-73
MXLOC_009654	0.158559	1.44944e-10	9.07217e-11
MXLOC_000041	0.155881	2.43746e-09	1.43224e-09
MXLOC_002054	-0.56455	3.13934e-12	2.12377e-12
MXLOC_019915	0.0275516	0.762324	0.163065
MXLOC_014368	-0.483357	0.234567	0.058262
MXLOC_007124	-0.232227	0.00664644	0.00221616
MXLOC_012486	0.68874	4.0183e-220	1.90814e-219
MXLOC_014529	-0.509554	0.246976	0.0610068
MXLOC_001698	-0.470159	0.00881396	0.00287851
MXLOC_011443	0.761694	2.12499e-09	1.25254e-09
MXLOC_008885	0.292789	7.12295e-32	8.36882e-32
MXLOC_000666	-0.949684	7.98838e-15	5.94466e-15
MXLOC_019370	-0.00961074	0.760245	0.162662
MXLOC_000832	1.07212	1.51035e-10	9.44616e-11
MXLOC_012037	0.962324	0	0
MXLOC_016666	-0.0990158	1.21066e-29	1.35977e-29
MXLOC_017729	-1.37874	2.29036e-26	2.39089e-26
MXLOC_002123	0.332432	1.25145e-22	1.18831e-22
MXLOC_013212	-1.46715	1.28621e-14	9.5108e-15
MXLOC_007534	-0.765907	9.11941e-14	6.5542e-14
MXLOC_012605	0.530506	0.000117069	4.84899e-05
MXLOC_015771	-2.53417	2.1617e-14	1.58742e-14
MXLOC_009820	-0.568339	0.069493	0.0193432
MXLOC_010515	-0.675355	1.32852e-39	1.7854e-39
MXLOC_019896	0.0228697	0.649814	0.142753
MXLOC_015615	0.0445714	0.394005	0.0923978
MXLOC_000170	-1.00253	0	0
MXLOC_009971	-0.938884	0.00112714	0.000419865
MXLOC_019547	-0.972286	2.39317e-102	6.23887e-102
MXLOC_014722	2.4141	1.96212e-24	1.95487e-24
MXLOC_021681	0.368619	0.00652747	0.00217991
MXLOC_014522	-0.839811	2.21739e-55	3.7178e-55
MXLOC_018572	-0.225398	0.259221	0.0637582
MXLOC_001014	0.532611	1.86101e-06	9.04697e-07
MXLOC_005887	0.165307	0.430663	0.0999174
MXLOC_004415	0.243288	1.91478e-63	3.54824e-63
MXLOC_012945	-0.272654	2.0821e-20	1.85676e-20
MXLOC_019458	-0.520752	1.70525e-12	1.16666e-12
MXLOC_000459	0.100057	8.49618e-06	3.90793e-06
MXLOC_007543	0.451416	2.0108e-147	6.94258e-147
MXLOC_007145	-0.373635	1.2371e-97	3.1333e-97
MXLOC_007315	-0.142558	0.020927	0.00642818
MXLOC_009211	0.607077	1.5594e-16	1.22743e-16
MXLOC_010860	0.0214725	0.0513521	0.0146493
MXLOC_002512	-0.246582	1.10652e-10	6.9623e-11
MXLOC_003406	1.38006	1.53434e-59	2.70115e-59
MXLOC_012927	0.0416806	0.78955	0.168153
MXLOC_018791	-2.77195	0	0
MXLOC_017109	-1.72738	0	0
MXLOC_015180	0.181595	3.88418e-05	1.68829e-05
MXLOC_000697	1.16113	0	0
MXLOC_020650	-1.58359	4.64991e-21	4.23776e-21
MXLOC_001264	0.293159	3.86688e-31	4.47029e-31
MXLOC_018190	-0.239297	7.27282e-06	3.36419e-06
MXLOC_013022	0.0529718	0.305812	0.0737504
MXLOC_003345	-0.675818	1.58521e-05	7.12011e-06
MXLOC_011157	-0.214547	0.010669	0.00344458
MXLOC_008167	-0.205855	0.00647345	0.0021629
MXLOC_003407	1.55555	2.86945e-38	3.77341e-38
MXLOC_005797	0.0041161	0.919527	0.191032
MXLOC_009328	-0.0770479	0.380192	0.0894885
MXLOC_014193	0.0288758	0.594464	0.132207
MXLOC_011534	-0.184851	0.00237804	0.000845807
MXLOC_006705	0.248433	0.0153799	0.00483234
MXLOC_002507	2.72095	9.10897e-23	8.67797e-23
MXLOC_006266	-0.0236256	0.487136	0.111337
MXLOC_017437	0.065484	0.260508	0.0640311
MXLOC_001532	0.548197	1.73851e-37	2.25949e-37
MXLOC_001716	0.278983	0.00415288	0.0014291
MXLOC_016444	-0.477551	4.7569e-81	1.03969e-80
MXLOC_007539	-0.274926	0.000242386	9.72932e-05
MXLOC_014657	0.0943205	0.00455667	0.00155962
MXLOC_019809	0.0526651	0.363443	0.0860508
MXLOC_015420	-8.52355	3.16307e-39	4.22189e-39
MXLOC_013869	-0.649584	4.33913e-06	2.04325e-06
MXLOC_017812	0.403581	0.0532994	0.0151554
MXLOC_018196	-0.30493	0.104975	0.0281626
MXLOC_019709	-0.345454	9.32389e-09	5.29624e-09
MXLOC_007815	0.301241	2.14224e-08	1.19074e-08
MXLOC_004515	-0.541616	5.84143e-38	7.6365e-38
MXLOC_017828	-0.233311	0.128375	0.0338598
MXLOC_012733	-0.0817642	0.00806883	0.00265219
MXLOC_018137	-0.571693	2.94122e-19	2.52849e-19
MXLOC_013750	0.32562	0.00219749	0.000784668
MXLOC_011541	1.29636	3.6617e-46	5.4144e-46
MXLOC_005081	0.399102	6.83058e-252	3.6548e-251
MXLOC_018732	0.79241	1.19457e-09	7.13135e-10
MXLOC_002617	-0.0268588	0.596127	0.132511
MXLOC_010766	-0.765285	1.08507e-50	1.70924e-50
MXLOC_019553	-0.862544	8.79571e-05	3.69318e-05
MXLOC_002798	-0.063823	0.820108	0.173649
MXLOC_007152	6.62086	9.42071e-13	6.5117e-13
MXLOC_011065	-0.0186433	0.912916	0.190021
MXLOC_004251	1.1974	1.31794e-26	1.38316e-26
MXLOC_015824	-0.730208	4.30647e-26	4.46218e-26
MXLOC_014660	0.38238	0.000563676	0.000217194
MXLOC_008330	-1.55511	1.24206e-207	5.67783e-207
MXLOC_006128	-1.25459	4.1245e-19	3.53332e-19
MXLOC_001254	-0.175367	4.76002e-12	3.19587e-12
MXLOC_020948	-0.261811	5.02741e-15	3.7664e-15
MXLOC_015349	0.0653098	0.00184019	0.000663668
MXLOC_014005	0.056151	0.255468	0.062914
MXLOC_016626	-0.340518	1.10758e-12	7.63307e-13
MXLOC_017845	0.0676685	0.00532189	0.00180288
MXLOC_013198	-1.01046	1.21869e-08	6.87149e-09
MXLOC_003120	-0.300386	5.76233e-09	3.31549e-09
MXLOC_009381	6.94692	2.26941e-15	1.71992e-15
MXLOC_017422	-0.272273	5.03874e-13	3.52312e-13
MXLOC_014533	-1.51308	3.00334e-31	3.47692e-31
MXLOC_021404	-1.376	5.96036e-75	1.23753e-74
MXLOC_000013	0.126975	6.68678e-07	3.35459e-07
MXLOC_011747	-0.0752451	0.00596641	0.0020094
MXLOC_006495	0.231197	6.22618e-92	1.49131e-91
MXLOC_018990	-0.276492	0.00225632	0.000804264
MXLOC_018551	0.613724	0.00617042	0.00207155
MXLOC_002945	3.44537	2.31627e-06	1.11935e-06
MXLOC_000564	-0.175661	0.00362557	0.00125737
MXLOC_012178	0.123397	0.056026	0.0158699
MXLOC_000277	-0.360006	0.0528083	0.0150315
MXLOC_010536	-0.677512	3.30115e-12	2.23077e-12
MXLOC_004686	-0.155764	1.13153e-07	5.99612e-08
MXLOC_018245	-0.0513087	0.0203578	0.00626453
MXLOC_017177	-0.322621	2.21678e-208	1.0162e-207
MXLOC_018801	0.869856	3.56684e-171	1.40715e-170
MXLOC_012955	-1.94483	1.95028e-41	2.68511e-41
MXLOC_021644	0.501158	9.55714e-18	7.83888e-18
MXLOC_008270	-0.969625	1.84704e-13	1.31379e-13
MXLOC_015177	6.89179	6.80749e-15	5.07978e-15
MXLOC_002935	-2.39374	1.59485e-19	1.38368e-19
MXLOC_015485	-1.02337	0.0127045	0.00403732
MXLOC_018003	-0.524029	2.73921e-19	2.35731e-19
MXLOC_016601	-0.960109	3.19941e-09	1.86696e-09
MXLOC_007350	0.101828	0.189313	0.0480855
MXLOC_019392	1.026	0	0
MXLOC_004960	0.197113	0.0930753	0.0252484
MXLOC_017205	-0.391846	7.75103e-58	1.33572e-57
MXLOC_017282	-0.081028	1.99408e-09	1.17779e-09
MXLOC_001504	0.191231	7.86817e-12	5.22817e-12
MXLOC_004191	-0.217696	1.99237e-110	5.4954e-110
MXLOC_001439	0.24944	0.100038	0.0269385
MXLOC_015161	-0.263689	3.54446e-41	4.869e-41
MXLOC_003075	0.746286	0	0
MXLOC_003524	-0.264117	4.21721e-19	3.61084e-19
MXLOC_004890	1.09425	1.4892e-31	1.73593e-31
MXLOC_007486	0.13387	0.0107441	0.00346725
MXLOC_011713	-1.62389	1.28584e-152	4.57839e-152
MXLOC_008950	0.0170378	0.277463	0.0676704
MXLOC_018382	-1.30639	0.00163552	0.000595776
MXLOC_008360	-0.197335	8.0963e-09	4.61876e-09
MXLOC_002110	-0.229198	7.14805e-46	1.05441e-45
MXLOC_013821	0.197649	0.462737	0.106366
MXLOC_017241	-0.494695	1.12543e-18	9.48842e-19
MXLOC_021333	3.04339	0	0
MXLOC_004267	0.0437192	0.225458	0.0562135
MXLOC_011423	0.310504	1.60426e-73	3.29179e-73
MXLOC_011294	0.0627691	0.302727	0.0730605
MXLOC_018946	-0.8311	1.08234e-10	6.81451e-11
MXLOC_015946	-0.160509	1.29611e-06	6.37423e-07
MXLOC_010902	-0.11041	0.765053	0.163577
MXLOC_013122	0.136132	1.51648e-06	7.42372e-07
MXLOC_000574	0.0191237	0.536016	0.120849
MXLOC_001150	0.322014	0.000179244	7.29652e-05
MXLOC_021649	0.375251	0.000670601	0.000255977
MXLOC_009132	-0.262819	7.26197e-09	4.15539e-09
MXLOC_003528	0.158126	0.000125523	5.18383e-05
MXLOC_013293	0.0451893	0.462549	0.106328
MXLOC_002908	-1.20192	5.51101e-13	3.84674e-13
MXLOC_009411	0.484837	3.8679e-50	6.05778e-50
MXLOC_011001	-0.345717	0.000248563	9.96409e-05
MXLOC_021552	0.0915067	0.69595	0.151326
MXLOC_011086	-0.667814	3.85758e-27	4.10211e-27
MXLOC_006092	-0.439985	2.9781e-26	3.10022e-26
MXLOC_017324	-0.391005	0	0
MXLOC_002010	0.0478573	0.121591	0.0322265
MXLOC_011363	0.368841	5.17839e-32	6.10317e-32
MXLOC_003088	-0.0572656	0.00159266	0.00058142
MXLOC_016702	-0.903846	4.77499e-20	4.2213e-20
MXLOC_002819	-0.320247	4.18854e-17	3.35841e-17
MXLOC_002708	0.0807925	2.74485e-06	1.31774e-06
MXLOC_011803	-0.134036	0.0654273	0.0183084
MXLOC_003465	0.493807	4.84926e-75	1.00769e-74
MXLOC_013413	0.265975	0.136466	0.0358106
MXLOC_020817	-1.0742	9.09296e-26	9.35836e-26
MXLOC_019502	-0.366295	0.0146609	0.00462185
MXLOC_019386	-1.09217	3.52465e-06	1.67422e-06
MXLOC_004570	0.203148	7.75761e-61	1.38867e-60
MXLOC_009919	-0.143358	0.154726	0.040148
MXLOC_016713	0.00556786	0.971293	0.199471
MXLOC_000398	-0.621426	4.75925e-11	3.0534e-11
MXLOC_019112	-0.262071	8.46638e-11	5.36709e-11
MXLOC_007319	0.395597	6.35554e-07	3.19398e-07
MXLOC_002216	-0.687698	0	0
MXLOC_004474	0.237472	1.00384e-142	3.39409e-142
MXLOC_013206	-0.210381	0.000306217	0.000121648
MXLOC_015231	-1.25772	0	0
MXLOC_002998	-0.249489	3.05515e-15	2.30222e-15
MXLOC_005671	0.851823	9.6971e-11	6.12271e-11
MXLOC_000212	-0.460393	0.0989543	0.0267114
MXLOC_014637	0.224525	0.275845	0.0673356
MXLOC_015564	0.454452	0.61957	0.137043
MXLOC_007725	0.608615	0.00194038	0.000697695
MXLOC_012159	-1.24418	3.81584e-12	2.57147e-12
MXLOC_004575	-0.24824	2.50842e-56	4.26122e-56
MXLOC_017554	0.271427	0.474195	0.108734
MXLOC_007308	-2.71003	1.884e-20	1.68347e-20
MXLOC_013854	0.290458	2.00498e-19	1.73092e-19
MXLOC_016914	0.921702	0.000310058	0.000123054
MXLOC_012150	0.845673	2.59069e-108	7.05822e-108
MXLOC_000644	-0.173437	0.300044	0.0725165
MXLOC_014545	0.203047	0.000313929	0.000124479
MXLOC_010228	3.07648	3.34352e-23	3.22676e-23
MXLOC_021154	-1.18037	6.41272e-41	8.78693e-41
MXLOC_012272	-0.327111	9.26576e-84	2.0648e-83
MXLOC_016377	1.50999	2.6643e-17	2.15283e-17
MXLOC_011338	-1.06085	1.15665e-22	1.09956e-22
MXLOC_021316	-0.771713	1.94661e-14	1.43119e-14
MXLOC_000341	-0.0857049	1.57242e-08	8.81014e-09
MXLOC_008086	1.98155	1.71711e-14	1.26417e-14
MXLOC_015725	-0.595396	9.85039e-21	8.88467e-21
MXLOC_009910	-0.671885	1.85597e-06	9.02516e-07
MXLOC_014914	-0.355656	0.000442309	0.000172356
MXLOC_010271	-0.706196	1.02384e-34	1.26772e-34
MXLOC_006644	-0.223575	1.83361e-26	1.91941e-26
MXLOC_019181	0.252816	0.00472888	0.00161382
MXLOC_003389	-0.308491	2.17497e-95	5.37793e-95
MXLOC_003537	-0.0844637	0.131702	0.0346662
MXLOC_003608	-0.158744	0.00263264	0.000930075
MXLOC_001434	0.256458	0.00311443	0.00109014
MXLOC_006082	-0.558467	5.30409e-162	1.99447e-161
MXLOC_010837	-0.179276	0.0295676	0.00882188
MXLOC_004752	-0.161694	3.04558e-14	2.22249e-14
MXLOC_002492	0.781073	2.89153e-38	3.80142e-38
MXLOC_014390	-0.780575	0.00315375	0.00110351
MXLOC_004321	0.172644	1.1803e-05	5.36541e-06
MXLOC_010296	0.594726	1.54588e-05	6.94984e-06
MXLOC_001280	1.2176	0.00470203	0.00160488
MXLOC_017846	0.342029	9.19654e-51	1.45194e-50
MXLOC_002761	-0.754813	2.54191e-44	3.67103e-44
MXLOC_002517	-0.54484	1.79083e-07	9.35015e-08
MXLOC_021106	-0.130006	0.018387	0.00570432
MXLOC_013395	-1.05982	3.39843e-95	8.37353e-95
MXLOC_003399	0.238368	8.27451e-13	5.73157e-13
MXLOC_010692	-0.0929496	0.531394	0.120032
MXLOC_009181	-0.325043	0.0670521	0.0187308
MXLOC_004567	0.204612	0	0
MXLOC_001563	0.303133	2.61937e-12	1.77932e-12
MXLOC_010548	1.29462	4.89279e-19	4.17614e-19
MXLOC_014640	2.98805	0.000407885	0.000159589
MXLOC_019497	-1.09648	0.00051656	0.000199905
MXLOC_004399	-0.00495594	0.955208	0.196816
MXLOC_003646	-0.287925	1.49157e-25	1.52835e-25
MXLOC_002224	1.74972	1.17987e-126	3.62844e-126
MXLOC_013360	-0.672308	2.49577e-38	3.28995e-38
MXLOC_009902	-0.363544	9.784e-29	1.07885e-28
MXLOC_014415	-0.0928181	0.0323592	0.00960038
MXLOC_007413	-0.552435	1.02993e-80	2.24405e-80
MXLOC_008672	0.581199	6.97301e-43	9.84678e-43
MXLOC_013937	0.243441	1.43147e-66	2.74403e-66
MXLOC_016052	-0.490881	2.01643e-54	3.33743e-54
MXLOC_021245	-0.535788	2.95967e-19	2.54346e-19
MXLOC_000741	0.588946	1.96627e-178	8.02211e-178
MXLOC_002437	-0.442129	7.21617e-06	3.33956e-06
MXLOC_008983	-0.178785	8.78149e-07	4.36741e-07
MXLOC_021184	0.347163	0.00143303	0.000526246
MXLOC_006032	0.0887838	3.33612e-16	2.59999e-16
MXLOC_000222	0.0956379	0.243243	0.0601638
MXLOC_000178	-0.0345578	0.191301	0.0485274
MXLOC_000792	-1.12327	0	0
MXLOC_005016	-0.0643092	0.199776	0.0504915
MXLOC_012934	-1.54224	2.67875e-75	5.57837e-75
MXLOC_017260	-0.527823	3.0819e-51	4.89568e-51
MXLOC_015026	2.15871	2.25474e-14	1.65401e-14
MXLOC_019134	-0.200594	0.0492756	0.0140983
MXLOC_020518	0.521719	0.173544	0.0445352
MXLOC_003726	-8.63834	8.33013e-42	1.155e-41
MXLOC_012102	0.406902	2.22405e-23	2.15659e-23
MXLOC_018865	-0.379834	4.08389e-31	4.71781e-31
MXLOC_002725	0.640429	1.29898e-17	1.06152e-17
MXLOC_006014	-0.253628	2.70785e-07	1.39682e-07
MXLOC_011252	-0.363185	9.52261e-45	1.38301e-44
MXLOC_018108	0.713403	3.30104e-21	3.01913e-21
MXLOC_008287	8.84737	1.01093e-44	1.46734e-44
MXLOC_018223	-0.166753	7.95667e-17	6.32072e-17
MXLOC_008789	-0.203702	4.58835e-18	3.80099e-18
MXLOC_019638	-0.573063	0.00232071	0.000826315
MXLOC_010973	-1.28577	0	0
MXLOC_019649	-0.144596	0.168414	0.043346
MXLOC_003373	0.013225	0.607708	0.134761
MXLOC_001147	1.04023	2.22837e-66	4.25166e-66
MXLOC_013193	-0.486711	2.04946e-15	1.55708e-15
MXLOC_015151	-0.698328	5.43729e-15	4.06849e-15
MXLOC_015343	-0.158566	0.010093	0.0032694
MXLOC_015017	-0.0456167	3.23857e-05	1.41871e-05
MXLOC_012109	-0.185787	0.0295919	0.00882859
MXLOC_019836	-0.239374	4.17585e-16	3.24513e-16
MXLOC_009881	-1.51252	2.43492e-50	3.82697e-50
MXLOC_018810	1.06603	5.70922e-06	2.66484e-06
MXLOC_012027	-0.722537	2.44955e-11	1.59222e-11
MXLOC_011887	-0.333134	1.71792e-05	7.69223e-06
MXLOC_014431	-1.1234	1.03036e-13	7.38793e-14
MXLOC_014217	-0.772215	1.03054e-203	4.65442e-203
MXLOC_008650	0.424653	5.5312e-42	7.68878e-42
MXLOC_003934	-0.0420812	0.217786	0.0545143
MXLOC_015379	-1.04917	1.53292e-58	2.66415e-58
MXLOC_003199	0.0477058	4.79313e-09	2.77152e-09
MXLOC_000817	0.582015	1.77433e-20	1.58664e-20
MXLOC_006991	-0.0813399	0.356362	0.0845385
MXLOC_012633	0.553095	1.97e-111	5.48e-111
MXLOC_011232	-0.0882112	0.000117602	4.87068e-05
MXLOC_006040	0.829207	3.18504e-15	2.39862e-15
MXLOC_001995	-0.378308	1.90595e-12	1.30207e-12
MXLOC_005254	0.048782	0.313296	0.0753939
MXLOC_001854	0.504607	3.30428e-79	7.10151e-79
MXLOC_009432	0.173394	1.35471e-06	6.65242e-07
MXLOC_008649	0.020464	0.086541	0.023635
MXLOC_007403	0.445405	0	0
MXLOC_008797	0.333713	1.24618e-16	9.84205e-17
MXLOC_007607	-0.184701	0.000164431	6.71811e-05
MXLOC_017306	0.298255	1.38361e-14	1.0214e-14
MXLOC_015227	-0.46629	8.05369e-25	8.0981e-25
MXLOC_001070	-0.26126	7.12271e-15	5.31014e-15
MXLOC_006908	0.279513	8.31434e-18	6.84015e-18
MXLOC_007512	0.817364	5.55083e-05	2.3776e-05
MXLOC_017569	-0.468589	1.22209e-10	7.6737e-11
MXLOC_000908	0.410758	7.79142e-44	1.11864e-43
MXLOC_011861	-0.566588	1.02145e-28	1.12581e-28
MXLOC_015447	-0.125645	0.0264204	0.00795266
MXLOC_017599	-0.322463	1.09935e-13	7.87452e-14
MXLOC_012078	0.0650403	0.149009	0.0388212
MXLOC_010801	2.07324	1.38594e-17	1.13127e-17
MXLOC_017712	5.61066	3.8141e-07	1.94574e-07
MXLOC_019993	-4.23677	0.00194399	0.00069894
MXLOC_001445	-0.315643	3.14011e-46	4.65299e-46
MXLOC_016825	-0.232916	0.0241902	0.00732868
MXLOC_011897	-0.0709536	0.368068	0.0870294
MXLOC_018725	0.903464	7.31674e-97	1.83419e-96
MXLOC_013660	-0.362322	0.0792201	0.0218217
MXLOC_015046	0.315787	0.000114072	4.73128e-05
MXLOC_014996	-0.464231	1.36606e-97	3.45455e-97
MXLOC_021611	0.0684676	0.484067	0.110726
MXLOC_000301	-1.27337	2.83504e-16	2.21583e-16
MXLOC_013091	0.204622	0.0277831	0.00833826
MXLOC_020262	1.12589	3.90121e-09	2.26757e-09
MXLOC_011397	-0.62612	2.58741e-114	7.34776e-114
MXLOC_000661	-0.25704	3.1508e-13	2.22274e-13
MXLOC_000995	-0.0399122	0.0812849	0.0223146
MXLOC_008970	-0.350841	1.06812e-54	1.77566e-54
MXLOC_010013	-0.457717	0.00721786	0.00239333
MXLOC_005259	-6.29595	4.7315e-11	3.036e-11
MXLOC_011246	-1.01586	0	0
MXLOC_016612	0.067823	1.60791e-24	1.60519e-24
MXLOC_003635	0.0944839	0.0121654	0.00388418
MXLOC_008663	0.110744	0.00130216	0.00048111
MXLOC_005877	-6.47478	2.97365e-12	2.01363e-12
MXLOC_016698	-1.30572	2.00285e-45	2.94023e-45
MXLOC_001295	-0.0510166	0.234975	0.0583487
MXLOC_019069	-0.230962	0.220562	0.0551246
MXLOC_003286	0.174223	0.195395	0.0494865
MXLOC_007417	-1.17219	6.41645e-11	4.08982e-11
MXLOC_012407	0.990951	3.58729e-213	1.66157e-212
MXLOC_016935	-0.935193	1.75195e-21	1.61592e-21
MXLOC_006907	-0.240739	0.0195894	0.00605204
MXLOC_020390	-0.832121	5.16624e-74	1.06677e-73
MXLOC_007400	-0.338448	0.000342755	0.000135296
MXLOC_020920	-1.68283	3.90339e-22	3.6526e-22
MXLOC_003895	-0.0144832	0.742106	0.159667
MXLOC_006925	0.285634	0.0103796	0.00335646
MXLOC_009445	-0.459378	2.57216e-63	4.75562e-63
MXLOC_001864	-0.1304	6.17544e-38	8.07101e-38
MXLOC_012190	0.123201	0.0173026	0.00539457
MXLOC_017313	2.52984	5.62175e-103	1.47419e-102
MXLOC_012366	-0.129464	1.00334e-26	1.0548e-26
MXLOC_020210	0.217493	4.0192e-15	3.01893e-15
MXLOC_016970	0.350353	0.0574859	0.0162542
MXLOC_002130	-1.01374	2.86623e-28	3.126e-28
MXLOC_016429	-0.357701	3.21512e-62	5.88e-62
MXLOC_012474	-0.501324	3.13533e-42	4.37449e-42
MXLOC_003401	-0.310409	1.63689e-13	1.16635e-13
MXLOC_009261	0.0572704	4.94886e-05	2.13132e-05
MXLOC_018747	1.64964	9.57649e-41	1.30781e-40
MXLOC_004481	-0.0337419	0.635113	0.139963
MXLOC_005085	0.342098	0.0958587	0.0259408
MXLOC_001508	-0.1348	2.43677e-10	1.51013e-10
MXLOC_000508	0.606156	0	0
MXLOC_006844	0.594443	8.33424e-103	2.17849e-102
MXLOC_001632	0.29856	2.13545e-101	5.51124e-101
MXLOC_021710	-0.0494191	0.62939	0.138877
MXLOC_017694	-2.99071	6.37084e-80	1.37768e-79
MXLOC_019839	0.0572146	0.840783	0.177513
MXLOC_021752	2.5224	5.91403e-192	2.55553e-191
MXLOC_012617	-0.353731	0.00170289	0.000618477
MXLOC_007519	-0.146081	0.387785	0.0911004
MXLOC_008922	-0.340686	0.000357275	0.000140823
MXLOC_003515	0.0197486	0.613652	0.135925
MXLOC_013147	0.0220534	0.76	0.162619
MXLOC_011725	-1.96317	6.43997e-95	1.58041e-94
MXLOC_012728	0.219076	5.66386e-09	3.26008e-09
MXLOC_015641	1.81491	6.72602e-294	4.11619e-293
MXLOC_009235	-1.84895	1.39618e-35	1.75719e-35
MXLOC_016544	-1.10054	0.00488182	0.00166184
MXLOC_003488	-0.370253	9.33287e-19	7.9025e-19
MXLOC_005158	-1.10968	2.16019e-12	1.47236e-12
MXLOC_015382	-0.0484877	0.611999	0.135589
MXLOC_010089	-2.93214	1.97283e-24	1.96514e-24
MXLOC_003499	0.136249	0.272495	0.0666346
MXLOC_003641	0.0916544	0.720303	0.155798
MXLOC_014526	1.07033	0.0301621	0.0089883
MXLOC_015414	-0.107914	0.00833314	0.00273352
[truncated: 13,319 more rows]

## Sheet: RNA
GeneID	log2Ratio_Control-VS-Treated	Pvalue_Control-VS-Treated	FDR_Control-VS-Treated
107398304	2.35276	1.11219e-08	6.2884e-09
103312946	-0.881683	3.19148e-37	4.12705e-37
103313974	0.0375565	0.910156	0.189576
107398484	-0.159207	0.696836	0.151499
103312715	-0.116685	0.283715	0.0690116
103312820	0.863199	0.00428531	0.00147188
107397765	2.66435	3.45884e-92	8.31726e-92
107398637	-0.743759	6.15319e-10	3.73343e-10
107397655	-0.238057	0.584493	0.130386
103314737	-0.101649	0.565878	0.126782
107397700	-0.486702	0.0195657	0.00604549
107398160	-1.08335	2.32014e-07	1.20227e-07
107397497	-0.202867	0.397811	0.0932098
103312629	-0.016113	0.930861	0.192874
107398613	0.0144308	0.948761	0.195784
107398475	-4.38731	0.000989218	0.000370633
107398373	-0.561754	0.0192487	0.00595165
103312194	-0.162247	0.0262434	0.00790329
107399064	-0.594293	3.5686e-06	1.6941e-06
107399236	0.215076	0.453994	0.104646
103314716	1.07212	0.279018	0.0679988
107398549	-1.15027	0.0365535	0.01072
107397467	-2.09781	0.0341602	0.0100907
107398429	-1.09114	0.000481611	0.000187001
107397641	0.628512	0.161841	0.0418434
107397919	0.434263	1.19518e-05	5.43036e-06
107399143	-0.96702	0.422171	0.0982454
107398356	-0.614971	0.232535	0.0577927
107397778	-3.62832	1.78616e-06	8.69864e-07
103312235	-0.381848	0.00664897	0.00221686
107398591	0.904944	0.309653	0.0746179
107398648	-2.73524	0.0291864	0.0087193
107397548	2.87947	0.0216777	0.0066368
107397782	-1.16972	8.62583e-24	8.45629e-24
107399019	0.0721184	0.960026	0.197555
103312550	-0.22629	0.0113248	0.00363809
107398058	-0.368551	5.04742e-08	2.73901e-08
107397910	0.808395	3.09748e-20	2.75073e-20
107399044	-0.375341	0.509614	0.115868
103312861	-0.941986	1.38287e-69	2.73327e-69
107397435	0.487156	0.656703	0.14395
107398119	0.433957	0.0297772	0.00887956
103314573	-0.626732	0.0078972	0.00260097
107398134	-1.15027	1.42868e-07	7.51541e-08
107397845	-0.268919	0.588067	0.13104
107398851	-1.92788	0.0587423	0.0165693
107397984	0.657081	0.614176	0.135967
103313753	-0.438847	0.0524764	0.0149439
107397818	1.48716	0.0224934	0.00686688
107398106	-3.73524	0.000397353	0.000155792
107398586	-0.13029	0.894097	0.186955
103313610	-0.300834	0.753041	0.161389
103312887	0.201691	6.02759e-06	2.80648e-06
107399148	0.228639	0.421211	0.0980452
103314885	-0.13888	0.0228853	0.00697392
107398179	-1.365	7.63628e-08	4.09216e-08
107398386	3.07212	0.0113178	0.00363609
107398679	-0.278379	0.359084	0.0851094
107397970	1.26351	0.0411859	0.0119817
103313339	0.950523	1.65101e-45	2.42589e-45
107398313	0.0721184	0.802601	0.170481
107398606	0.273752	0.534285	0.120504
107398993	0.225614	0.626587	0.138314
107398124	-0.428001	4.14336e-05	1.7969e-05
107398889	-1.04988	0.000218934	8.82556e-05
107398886	-3.41845	0.0300354	0.00895164
103313279	-1.20618	4.2204e-07	2.14563e-07
107397611	-0.215326	8.30573e-07	4.13626e-07
103315250	1.71498	0	0
107398629	-0.483743	0.000119859	4.96079e-05
107398874	-0.251922	0.665988	0.145717
107398517	0.586692	0.405475	0.0947606
107397943	0.313126	0.288416	0.0700104
107398291	1.07212	0.531972	0.120054
107398620	-0.705489	0.295109	0.0714325
107397871	-0.00533778	0.956812	0.197072
107399169	-0.0549047	0.72114	0.155945
107398027	-1.69342	0.0117169	0.00375149
107399288	-0.848447	0.00983898	0.00319219
103313632	-0.60238	0.0171829	0.00536065
103313700	-0.0451938	0.860473	0.181014
107398142	-0.565312	0.0140317	0.00443236
107398723	-4.49226	0.000594197	0.000228343
107398109	0.259266	0.00144204	0.000529472
107397549	-0.906508	0.00214058	0.000765464
107397723	-1.22108	2.77874e-10	1.71641e-10
107398020	-1.38731	0.0132481	0.00419838
107397706	-0.501617	0.0117787	0.00376929
107397477	2.08675	3.80998e-07	1.94384e-07
107398380	-0.685146	8.05359e-05	3.39526e-05
107399174	-0.99162	1.70587e-07	8.92367e-08
107397533	-0.24981	0.79566	0.169153
103313255	-0.257189	0.78219	0.166731
107397510	1.27009	0.0139257	0.00440114
107399120	0.355403	0.680322	0.148495
107397582	1.07212	0.162252	0.0419276
107397986	1.39405	0.224282	0.0559515
103314007	-1.09389	2.6412e-05	1.16453e-05
107398661	1.07917	0.52468	0.118731
103312992	-0.668715	5.3767e-06	2.51466e-06
107398551	0.255241	0.833165	0.176094
103314510	0.0160186	0.853616	0.179718
107397500	-0.512844	0.577912	0.1291
107398346	0.306503	0.159609	0.0413298
107398522	0.903849	0.00511396	0.0017364
107397514	0.417498	1.32259e-14	9.77389e-15
107397701	0.141448	0.585698	0.130643
107398435	-0.18514	0.667907	0.146105
107398079	-0.297115	0.187664	0.0477161
107397526	1.07212	0.279018	0.0679988
107397768	-0.461963	5.94167e-07	2.99336e-07
107397900	0.142508	0.751814	0.161168
107398590	-0.550849	0.00870894	0.00284763
103314657	0.871461	1.48679e-05	6.69342e-06
107397792	2.07212	0.150858	0.039238
107397866	0.502753	0.0273981	0.00822774
107398136	-1.6848	0.0260416	0.00784539
103314376	-0.295195	0.127817	0.0337271
107399235	-1.29045	0.00272398	0.000960681
107398212	2.07212	0.0422014	0.0122473
107398904	-1.66462	0.00596449	0.00200896
107398669	1.40001	1.65239e-07	8.65684e-08
107398533	1.07212	0.531972	0.120054
103314286	-1.66485	0.0561334	0.0158938
107399292	-0.817699	5.40018e-13	3.77315e-13
107398118	0.0133527	0.934764	0.193488
107397482	-1.06539	0.00444815	0.00152514
103312799	0.124935	0.133281	0.0350516
107398649	0.725273	1.61657e-10	1.00912e-10
107398229	-0.080961	0.413857	0.0964619
107398178	0.793873	3.36855e-25	3.42013e-25
107398013	0.335153	0.700605	0.152163
107397434	-0.138387	0.00748276	0.00247413
103314793	-0.866094	7.46597e-17	5.93669e-17
107397832	0.252691	0.483908	0.110702
107397442	-1.51284	0.1675	0.043138
103313019	0.000318396	0.995102	0.203469
107398638	-0.382439	0.0572662	0.0161949
107398014	-0.503194	0.00642478	0.00215001
107398444	-2.51284	0.0538691	0.0152978
107398872	-1.12567	1.6016e-07	8.39708e-08
107397966	-0.961745	0.00142169	0.000522199
103312958	0.27636	0.000211013	8.52101e-05
107398193	0.199859	0.685829	0.149451
107398892	-0.26326	0.272861	0.0667076
107398372	-0.202276	0.0981291	0.0265091
107398692	-1.51284	0.0509366	0.0145376
107397593	-4.24981	0.00183801	0.000663076
107398267	1.87947	0.0020233	0.000725592
107397449	-0.522182	0.000977503	0.000366749
107398228	-1.72934	7.24449e-12	4.81966e-12
103313124	0.273417	0.057709	0.0163117
107397638	2.65708	0.0414952	0.0120616
107398153	-0.896855	0.475833	0.109076
103312860	-0.903239	1.20867e-79	2.60796e-79
107398085	-0.962	0.0770936	0.0212841
107398428	-1.65923	0.0536041	0.0152358
107397622	-0.167069	0.504954	0.11498
103314242	-0.742326	0.0240297	0.00728455
107398936	-0.956451	0.57525	0.128659
107399033	-0.497247	0.0341463	0.0100907
107397738	0.335153	0.700605	0.152163
107398190	-1.14697	4.70899e-28	5.11981e-28
107398260	-0.537124	8.93049e-11	5.65399e-11
107398280	-0.000979385	0.998232	0.203949
107397527	-0.32381	0.458668	0.105545
107397892	-0.248846	2.74293e-10	1.69451e-10
107398072	-3.38731	0.00249456	0.000884358
107398385	-1.25594	1.07828e-07	5.72196e-08
107399028	-0.776982	0.192825	0.0488686
107399078	-0.288948	0.00698815	0.00232204
107399043	-0.567043	5.44009e-05	2.33201e-05
107398605	-0.0433589	0.940122	0.194321
107398919	0.868066	0.0176949	0.00550776
107397908	-0.512844	0.577912	0.1291
107398323	3.71828	0.0153332	0.0048189
107398678	-1.49725	8.15632e-08	4.36464e-08
107399210	1.29451	0.054717	0.0155278
107399058	0.839742	0.0341273	0.0100871
107398986	-0.00967379	0.958462	0.19737
107398231	-0.664847	0.00412568	0.00141994
103313953	0.34845	0.00323583	0.00113029
107397690	0.902193	0.125514	0.0331855
107397991	0.313126	0.595556	0.132402
107397565	-0.735237	0.241	0.0596781
107398502	0.657081	0.475886	0.109076
103315224	-2.09781	0.0341602	0.0100907
107398393	-3.51284	0.023433	0.00711866
107398125	-1.40095	3.17414e-36	4.03534e-36
107397682	0.0219778	0.751846	0.161168
107398619	-0.172994	0.645683	0.14203
103313344	1.34881	0.00119821	0.000444784
107397441	-1.8713	3.62503e-06	1.71973e-06
103314540	-0.0161374	0.986741	0.202038
107398799	0.0885334	0.540768	0.121809
107398088	-1.51284	0.329061	0.0787252
107397963	2.87947	2.83737e-07	1.46132e-07
103314604	-0.957028	0.694681	0.151084
107398268	-0.628321	0.325312	0.0779655
107398882	-0.441501	0.0508732	0.0145237
107397697	-0.332535	0.00630918	0.00211567
107397872	-1.20542	2.2793e-05	1.01106e-05
107397647	-0.294817	0.276823	0.0675245
107397513	-0.961829	0.000256964	0.000102816
107398259	-0.618072	1.30257e-05	5.90153e-06
103313063	-0.0587614	0.849844	0.179101
103314802	-0.642768	0.000475179	0.000184635
107399266	2.87474	1.16735e-16	9.2314e-17
103312491	2.37697	7.90284e-13	5.48343e-13
103313819	-0.0467976	0.666593	0.145843
107397826	0.809084	0.435074	0.100793
107399194	-0.558829	0.0152122	0.00478427
107398552	1.62821	0.0397689	0.0115922
107397990	-1.62832	0.0320746	0.00952
107397589	-1.42265	0.00272792	0.000962002
107398992	-0.101585	0.707699	0.15352
107397483	-4.24981	0.00183801	0.000663076
107398887	0.11987	0.000344164	0.00013583
107398137	-0.784985	0.0655164	0.018329
107398349	0.117922	0.646383	0.142152
107399223	0.352226	0.497658	0.113482
107399240	0.0586586	0.494756	0.112894
107399170	-0.412962	0.00127273	0.000470947
107398108	1.5517	0.000499844	0.000193742
107398482	-0.0560959	0.612747	0.135737
107398434	-0.705489	0.295109	0.0714325
103313860	-2.01249	0.0839562	0.0229847
107398405	-2.09781	0.0341602	0.0100907
107398820	-0.368454	0.46574	0.106966
107398078	1.26476	0.0437022	0.0126416
107398646	-0.117216	0.552016	0.124046
107398774	-0.0229714	0.972452	0.199571
103313585	-0.0723272	0.230666	0.0573716
107398704	-3.24981	0.0451574	0.0130041
107397642	0.0167225	0.940162	0.194321
103312506	-0.0328783	0.802062	0.170381
103314760	-0.512844	0.577912	0.1291
107398358	-1.92788	0.181381	0.0462917
107398598	-0.443802	0.14543	0.0379715
107397665	-0.664217	0.0252067	0.00761075
103312162	0.108644	0.375857	0.0886387
103315030	0.167086	0.00149253	0.000547026
107397808	0.528497	0.00931547	0.00303077
107398126	0.75019	0.355051	0.0842555
103314053	-0.413308	0.622155	0.137485
103313999	-0.515954	2.64113e-39	3.53004e-39
107398384	-0.790378	0.135654	0.035625
107398400	0.898089	0.0171862	0.00536133
107398995	-3.75976	0.0113533	0.00364652
107399066	0.261876	0.171416	0.0440516
107398875	-0.51992	5.55085e-18	4.58978e-18
107399153	-0.704687	0.493637	0.112644
103312579	-0.342919	0.347929	0.0827942
107397741	-2.73524	0.0291864	0.0087193
107397633	-0.171807	0.623831	0.137805
107399251	-0.413308	0.622155	0.137485
107398559	2.22347	0.0420912	0.012224
107397878	-0.757957	0.198058	0.0500963
107398438	0.420519	0.362697	0.085895
107398915	-0.351152	1.74128e-14	1.28139e-14
107398912	0.801864	0.258752	0.0636588
107397959	-0.58424	0.00103093	0.000385817
107399286	0.657081	0.614176	0.135967
107398015	0.0841912	0.651877	0.143174
107397702	0.0877656	0.777011	0.165767
107398557	-3.51284	0.023433	0.00711866
107398012	-1.51284	0.1675	0.043138
107399079	0.358423	0.237103	0.0588354
107398981	-0.137671	0.241809	0.0598512
107398309	-0.782165	0.0570453	0.0161362
107398971	0.319378	0.253197	0.0624081
107398946	-0.021827	0.823077	0.174182
107397520	0.837653	0.0102252	0.0033098
103315124	2.29102	9.6046e-68	1.86672e-67
107399205	-0.358606	0.253392	0.06245
103312308	0.231803	0.00993779	0.0032219
103312819	-1.07675	0.265387	0.0650981
107397940	-0.735237	0.241	0.0596781
107397976	0.0721184	0.910986	0.189684
107397939	0.198876	0.162964	0.0421028
103314386	-0.416381	0.0690152	0.0192211
107398104	-1.04632	1.67954e-17	1.36659e-17
107398655	-2.51284	0.000840204	0.000317596
107397929	0.70015	0.20437	0.0515516
107397465	-0.158059	0.246901	0.0609913
103312398	0.142382	0.417939	0.0973298
107397865	-0.147274	0.0872994	0.0238241
107398203	-1.15245	2.08957e-11	1.36294e-11
107398572	-0.128579	0.593215	0.131965
107397524	0.640048	0.559602	0.125578
107398996	1.39405	0.224282	0.0559515
107397512	0.487156	0.656703	0.14395
107399287	-0.771156	0.0107392	0.00346588
107397815	-0.716378	0.1818	0.046389
107398575	-3.4503	5.27671e-118	1.53045e-117
107399249	-0.367666	0.000944449	0.000355163
103313374	-1.51284	0.329061	0.0787252
107398597	-0.356042	0.0690153	0.0192211
103314826	-0.610784	0.187701	0.047723
103313518	0.572368	3.57095e-27	3.79978e-27
107398833	1.65708	0.285042	0.0692636
107397816	2.14251	0.000773795	0.0002934
107398006	-3.73524	0.012264	0.00390877
107398175	0.335153	0.586599	0.130802
107397436	-0.239826	0.503964	0.114781
107398024	0.097073	0.286992	0.0696888
107399146	-1.68079	6.59735e-09	3.78304e-09
107398441	-0.316447	0.218487	0.0546703
107398898	0.645527	0.0158521	0.0049724
107398344	0.423591	0.234663	0.0582829
107398941	-0.329354	4.13921e-05	1.79542e-05
103312246	0.424971	0.0602256	0.0169613
103313133	-0.859558	0.000978555	0.000367115
107399009	-0.891574	3.09326e-07	1.5876e-07
107398686	0.289131	0.00101106	0.000378526
103312752	-0.120527	0.871601	0.183041
103315200	-0.0872695	0.674833	0.147468
107397889	-0.519213	0.0176426	0.00549427
107398931	-0.750257	0.0901041	0.0245198
107397516	-1.9958	9.42626e-05	3.9407e-05
103313917	-0.310673	0.0120164	0.00384123
107398721	0.107742	0.736791	0.158664
107398408	-0.0891089	0.692252	0.150683
103312963	0.121382	0.650488	0.142895
107399206	-0.613223	0.26951	0.0659936
103313933	-0.170731	0.645876	0.14206
103314964	-1.66426	0	0
103312727	0.00445665	0.90567	0.188842
107399046	1.65226	0.286847	0.0696572
107398148	0.0721184	0.971798	0.199471
107398796	0.586692	0.405475	0.0947606
103313690	0.795089	0.00250395	0.000887238
107397760	1.07212	0.531972	0.120054
107397876	-0.158474	0.222829	0.05566
107398394	-0.735237	0.0972863	0.0262989
107398568	-3.51284	0.023433	0.00711866
107398697	-1.3118	1.66389e-07	8.71524e-08
107398378	-0.824078	9.62724e-12	6.37542e-12
107399021	0.0678437	0.862801	0.181434
107399234	-0.605954	0.455051	0.104826
107398891	-0.526441	0.0168502	0.00526022
107397595	-0.389713	0.000627379	0.000240416
107398039	-0.195815	0.48152	0.110197
107398445	-0.29153	0.00559539	0.00189134
107399171	-0.137058	0.408096	0.0952533
107398988	2.39405	0.0792757	0.0218217
103312318	0.0395279	0.642055	0.141334
107397648	0.67158	0.0358873	0.0105569
107397689	1.75019	0.0102915	0.00332907
103314722	0.786073	0.0359676	0.010578
103315007	0.491173	5.13673e-09	2.96284e-09
107399055	0.576485	0.167822	0.0432097
107398206	0.255046	0.764262	0.163436
107398754	0.00172903	0.99567	0.203542
107397546	-0.425527	0.0143681	0.00453422
107398437	-0.224137	0.422557	0.0983257
107397643	-0.701646	0.0124128	0.00395027
107397844	-1.05754	0.00057397	0.000221004
107399140	-0.778609	0.00764341	0.00252299
107398647	-1.92788	0.00280316	0.000986547
103314612	-1.13237	0	0
107398876	0.0721184	0.971798	0.199471
107397914	1.94659	0.0221914	0.00678017
107398584	0.415006	0.0505842	0.0144496
103313687	-0.566667	2.79404e-06	1.33959e-06
103314734	0.108877	0.789092	0.168071
107397930	-0.54937	0.279519	0.0680972
107398310	0.405645	0.00165443	0.000602175
107397557	-0.344721	0.65637	0.143948
107397626	0.380241	0.367577	0.086933
107398705	-4.51284	0.000535552	0.000206911
107397769	2.14829	0.00596471	0.00200896
107398938	1.17209	5.93461e-11	3.78714e-11
103313161	0.264763	0.722556	0.156154
103312488	0.294511	0.713224	0.15452
107398198	0.305791	2.65757e-10	1.64384e-10
107397736	0.809084	0.435074	0.100793
107397551	0.394046	0.682913	0.148941
107398120	1.06489	0.535255	0.120706
107398884	-0.526944	0.1686	0.0433871
103315238	-0.162228	6.89856e-51	1.0902e-50
107398531	-0.512844	0.577912	0.1291
107398427	0.557545	0.506194	0.115187
103312857	0.75019	0.355051	0.0842555
107398603	-1.65458	7.46125e-05	3.15396e-05
103313735	-0.880459	0	0
107398573	-0.154157	0.418433	0.097431
107398145	0.783112	0.145994	0.0381025
107398955	0.325585	0.0671145	0.018745
107397841	0.059649	0.481877	0.110274
107398355	-0.1571	0.0549813	0.0155938
107398064	-3.51284	0.00135047	0.000497307
103313767	-0.231982	0.22802	0.0567654
107397612	0.414511	0.106631	0.028574
107397464	-0.397367	0.0884621	0.0241091
103312464	-0.895318	9.3959e-17	7.45194e-17
107397462	0.111647	0.740919	0.159433
107397951	1.155	3.67771e-12	2.47941e-12
107399233	0.501655	4.98301e-06	2.33455e-06
107397502	3.39405	0.0364302	0.010689
107398803	-0.832572	0.000353514	0.000139374
107398060	-0.695739	2.26941e-08	1.25886e-08
103313353	-0.171705	0.119148	0.0316357
107397470	-1.46845	0.00182096	0.000657798
107397658	-2.77898	1.0534e-06	5.21413e-07
103313559	0.120837	0.663669	0.145288
107399087	-0.735237	0.151001	0.0392711
103315240	5.19743	4.20838e-19	3.60392e-19
107398864	1.18962	0.00169066	0.0006144
107398523	0.657081	0.614176	0.135967
107397632	0.616114	0.0293464	0.00876018
107397597	0.0721184	0.971798	0.199471
107399221	0.0721184	0.915536	0.190373
107398370	-0.269493	0.00393174	0.00135701
103314222	0.188237	0.0798943	0.021971
107398914	-0.0419608	0.798203	0.169642
107399283	-0.845419	0.144965	0.0378701
107398303	-0.325128	0.000612337	0.000234872
107398913	-1.34001	1.48596e-16	1.17018e-16
107397763	-2.24981	0.0991119	0.0267318
103312543	0.799493	1.0164e-08	5.76343e-09
107397781	-1.3937	6.08633e-161	2.27464e-160
107398587	2.07212	0.0128426	0.00407806
107398762	0.871715	0.00245168	0.000870669
107399086	2.49846	6.22646e-05	2.65353e-05
107397837	0.581132	0.11262	0.0300244
103315146	-1.83721	5.91766e-05	2.52809e-05
107399029	3.97797	0.000215419	8.69103e-05
107399045	-0.724348	0.0755984	0.0208979
107398795	1.51269	0.0117954	0.00377416
103313623	0.101866	0.622867	0.137605
103314792	0.227093	0.260064	0.0639397
107398672	-0.120178	0.00559693	0.00189173
103312359	2.66296	8.36243e-13	5.79083e-13
107399212	-0.527794	0.0216429	0.00663038
107398005	-0.622073	0.00117625	0.00043703
103312813	-0.878998	0.00010352	4.31004e-05
103312890	0.798823	2.56398e-22	2.41308e-22
103314426	0.356518	0.0283825	0.00850511
107398371	-0.741999	0.0163851	0.00512713
107398195	-0.751559	6.26648e-06	2.91327e-06
107398994	0.220762	0.207236	0.052191
107397577	0.809084	0.435074	0.100793
107399010	0.335153	0.505423	0.11506
103314701	0.504446	0.376943	0.0888092
103315150	0.954621	3.20837e-06	1.53022e-06
107398446	0.159237	0.829435	0.175389
107397821	-0.863472	1.55857e-52	2.51583e-52
107398046	-0.20511	0.251811	0.0620948
103314966	-0.266361	0.0458372	0.0131821
107397779	-0.588167	1.84762e-13	1.31401e-13
103314833	0.985048	0.000609954	0.00023405
107398859	-0.512844	0.335157	0.0800623
107398149	-0.512844	0.297876	0.0720388
107397525	0.23203	0.0420781	0.0122216
107397605	0.628672	1.27299e-10	7.98713e-11
107398815	0.0289911	0.956519	0.19703
107398585	0.150121	0.751649	0.161167
103313519	3.04218	2.52222e-290	1.52449e-289
107398611	-0.707438	1.01467e-09	6.08707e-10
107398402	-0.0640424	0.617508	0.136643
107398602	-0.202057	0.4958	0.113095
103314244	-0.105031	0.693482	0.15091
103312955	-1.92788	0.00280316	0.000986547
107398226	0.574619	0.132196	0.0347906
107397649	0.351777	0.0196072	0.00605676
107397584	-0.571738	0.21006	0.0527963
107399207	-1.09781	0.187438	0.0476686
107397831	0.264763	0.112329	0.0299601
107397515	2.97901	1.34276e-06	6.59569e-07
107397901	-10.0092	3.68598e-88	8.54854e-88
107399209	-1.27987	1.0157e-06	5.03157e-07
107397874	0.340457	0.0186627	0.00578289
107398023	0.640402	0.0621099	0.0174395
107398464	0.487156	0.656703	0.14395
107398793	-1.51284	0.1675	0.043138
107398899	5.66368	2.29981e-07	1.19287e-07
107397785	-0.6135	2.30137e-12	1.56749e-12
107397995	-1.41331	0.00459647	0.00157148
107398493	-1.51284	3.94733e-07	2.01077e-07
107398010	-1.51284	0.1675	0.043138
107398333	0.954888	0.00451765	0.00154801
103315006	-0.399207	0.00768276	0.00253512
107397461	-0.342919	0.658152	0.144209
107399228	0.0721184	0.943632	0.19489
107397796	-1.11138	0.000819539	0.00031012
107399172	-0.0433589	0.940122	0.194321
107397855	-1.73524	0.0998893	0.0269074
107399088	0.26245	0.240257	0.0595274
103315032	5.69036	1.77225e-07	9.25609e-08
107397772	0.0107178	0.979683	0.200786
103314120	-0.760154	0.00584817	0.00197229
107398180	0.374351	0.00297123	0.00104277
107397803	0.0721184	0.925479	0.191926
107398191	0.317231	0.399169	0.0934923
107398719	0.0155348	0.969328	0.199193
107399179	-1.27945	0.0120972	0.00386393
103312514	0.00467172	0.972042	0.199512
107397686	1.2056	0.08114	0.0222785
107398290	-0.565312	0.353174	0.0838873
103313131	-0.052329	0.977969	0.200485
103312849	-0.260943	9.92303e-37	1.2711e-36
103314012	0.0143756	0.691405	0.150532
103314443	0.209646	0.274544	0.0670753
107397994	0.0721184	0.960125	0.197555
107398625	2.39405	0.0792757	0.0218217
107397829	-1.10033	1.81872e-122	5.40959e-122
107398037	-2.62832	0.00362149	0.00125604
107397942	-0.0599852	0.797137	0.169435
107397709	0.670659	9.11348e-10	5.48e-10
107399052	0.0721184	0.841492	0.177616
107398139	-0.100115	0.338685	0.0808223
107399284	-0.282977	0.333366	0.0796694
107398067	2.29451	0.00419132	0.00144091
107398258	-0.352936	0.0592145	0.0166919
107399109	-1.50705	0.000915657	0.000344919
107397883	-0.0320011	0.936702	0.193805
107398481	0.0400396	0.918119	0.190804
107398595	0.0293869	0.363604	0.0860848
107398801	-1.08254	0.000607625	0.000233211
107397635	1.33515	0.0685195	0.0191037
107398494	-4.73524	0.000159576	6.52625e-05
103314584	-0.410482	0.0615962	0.0173144
107397505	-0.619759	0.0807321	0.0221815
107397913	3.39405	0.0364302	0.010689
107397933	-0.312434	0.701026	0.152248
107397471	0.809084	0.176397	0.0451773
107398806	-2.24981	0.000972552	0.000364975
103312759	-0.402967	0.0319632	0.00949267
107398617	2.02905	8.58036e-09	4.88807e-09
103312583	1.29079	2.11031e-10	1.31113e-10
107398223	-0.739437	0.00349502	0.00121519
107399127	-1.24981	0.275939	0.0673356
107397898	-0.561559	7.93223e-05	3.34698e-05
103314799	-0.414028	4.86826e-23	4.67521e-23
107398157	-0.682769	0.00821947	0.00269858
107397629	-0.775879	0.00183868	0.000663269
107398817	-2.09549	0.00533864	0.00180805
107397663	-0.236004	0.576	0.128783
107397620	-0.552807	0.0739684	0.0204829
107398683	-0.134333	0.805624	0.171034
103312297	-0.00787548	0.955014	0.196809
107398225	-1.92788	0.181381	0.0462917
103313883	-0.434207	1.86212e-06	9.05146e-07
107399144	-0.694005	0.00831557	0.00272794
107399068	0.0546112	0.684267	0.14919
107398146	-0.522966	7.52561e-40	1.01555e-39
107397451	-1.65035	0.000564505	0.000217497
107399071	-0.296434	0.309478	0.0745794
107398526	-1.32579	0.0213234	0.00654233
103313574	0.0976535	0.924157	0.191814
107397974	-0.200525	0.577744	0.129098
103313018	-1.44678	1.0062e-13	7.21892e-14
103313303	0.852863	3.5416e-05	1.54497e-05
107399189	-0.860767	0.0999688	0.0269229
107399106	-0.0442324	0.665846	0.145699
107397523	0.459981	0.1515	0.0393843
107397603	-0.406521	0.0342919	0.0101216
107398634	0.904391	0.0010412	0.000389455
107397905	-0.139386	0.757358	0.162108
107398654	-0.24981	0.71419	0.154667
103314791	1.19765	2.21196e-06	1.0702e-06
107397583	-0.190916	0.826628	0.174863
103313038	-0.609007	7.9296e-09	4.52789e-09
107397830	0.274077	1.54407e-05	6.94235e-06
107398163	-0.24981	0.604504	0.13415
107398744	-0.107904	0.372652	0.087993
107397617	-0.0963643	0.347162	0.0826397
103313555	0.523121	3.12291e-10	1.9227e-10
107397480	-0.861119	1.18338e-06	5.83567e-07
107397560	0.31539	0.258966	0.0637019
103314698	0.361319	5.08161e-08	2.75726e-08
107399038	0.213876	0.752403	0.161273
107397568	0.453989	0.17197	0.0441662
107397651	0.665542	0.504942	0.11498
107399057	-0.352936	0.0592145	0.0166919
107397751	0.73984	0.14854	0.0387132
103313480	0.177219	0.384555	0.0904372
107398819	0.618376	0.093653	0.0253924
103312780	-2.12727	3.04291e-40	4.13134e-40
107397652	0.399004	0.379703	0.0893907
107398776	-2.98828	4.44338e-05	1.92123e-05
103314957	-0.840298	0.000187653	7.62613e-05
107398318	1.01553	0.0345406	0.0101899
107397810	0.220982	0.450906	0.104008
103313516	-0.397367	0.0031709	0.00110911
107397607	0.635198	0.54556	0.122803
107399074	-0.298321	0.386205	0.0907599
107397468	-0.637292	1.41272e-07	7.43943e-08
107398757	-0.664847	0.521269	0.11809
107398103	-0.652247	0.0821272	0.0225218
107399097	-0.219555	0.0644604	0.0180563
107398382	-1.05031	0.000540985	0.000208879
103313926	0.0115279	0.890017	0.186285
107399023	0.130232	0.57918	0.129331
103313238	-0.301198	0.000269091	0.000107484
103314891	-0.391499	0.00208624	0.000747121
103314912	0.304208	0.00379859	0.00131383
107397884	0.0721184	0.960125	0.197555
107397851	-0.613223	0.26951	0.0659936
107398663	0.657081	0.21689	0.0543123
103313655	-0.19351	0.148906	0.0388046
107397644	-0.279354	0.87544	0.183697
107398266	-1.11551	0.00437007	0.00150005
107399244	-3.8193	0.000238139	9.56589e-05
107398828	0.701281	0.0276442	0.0082996
107398920	-0.101611	0.904438	0.188638
107399128	-0.924999	0.227676	0.0566857
103313769	-0.77343	0.000407371	0.000159414
107398890	0.394046	0.157052	0.0407149
107397579	-0.387313	0.560893	0.125798
103313295	-0.711916	1.54478e-245	8.12354e-245
107397544	-0.736884	3.3778e-06	1.60758e-06
107398279	-0.671636	4.94623e-08	2.68559e-08
103312806	0.502401	5.87414e-18	4.85136e-18
107399300	5.95133	1.10416e-08	6.24367e-09
107397708	1.07212	0.531972	0.120054
107399227	-0.705489	0.295109	0.0714325
107397804	0.278569	0.609846	0.13518
107398927	-0.28027	0.551952	0.124037
103313286	-0.368454	0.46574	0.106966
107397854	1.87947	0.0117237	0.00375294
107398353	0.0721184	0.898571	0.187698
103313821	0.0383218	0.879333	0.184372
107397813	-1.6357	1.00482e-20	9.05474e-21
107398240	3.39405	0.0364302	0.010689
103314782	-0.258799	0.00846955	0.00277492
103314089	-1.11619	1.28076e-06	6.30254e-07
103313656	0.217291	0.0143936	0.00454111
103313689	0.0721184	0.925479	0.191926
103314264	-0.76416	2.7516e-28	3.00232e-28
103314848	-0.606289	0.0284875	0.00853081
103315033	0.526988	0.000233132	9.37323e-05
107397916	0.337852	0.101828	0.0273853
103314790	-0.0682543	0.688224	0.149939
107397522	-0.842436	1.21683e-05	5.52636e-06
103314940	0.617787	0.238674	0.0591742
103312338	0.307335	0.12416	0.0328435
107399161	0.487156	0.441393	0.102107
103313784	-0.739478	7.63411e-48	1.15821e-47
107398758	-0.037229	0.83398	0.176251
107398447	0.818362	0.000324586	0.000128435
107397454	-1.92788	0.0010612	0.000396388
107398703	0.299532	0.107504	0.0287844
103313500	1.85692	8.57121e-07	4.26543e-07
107399241	-1.06539	0.044287	0.0127926
107399047	-0.125986	0.108253	0.0289721
107398515	0.232081	0.000251314	0.000100654
103315073	0.636019	0.0992024	0.0267518
107399124	-1.92788	0.181381	0.0462917
107397932	-0.813914	0.0515806	0.0147077
103314714	0.151223	0.586642	0.130806
107397606	-0.171308	0.677982	0.148051
103312357	-0.346492	0.0436717	0.0126358
107397925	-0.158001	0.352592	0.0837775
107399238	-1.51284	1.27219e-05	5.7692e-06
107399176	-0.927882	0.0257311	0.00776093
107398442	-0.600445	0.0156001	0.00489871
107397904	0.0721184	0.971798	0.199471
107397645	-3.36938	0.00234	0.000832942
107398635	0.0323722	0.830718	0.175645
107397570	-0.849879	0.00258588	0.000914347
107397437	0.159054	0.315217	0.0757834
107398853	1.03134	0.00286941	0.00100906
107398144	-1.09781	0.187438	0.0476686
107398450	-0.123277	0.812424	0.172238
107397613	-0.167425	0.536038	0.120849
107398187	-0.255936	0.197905	0.0500755
107398083	-0.689722	0.000215029	8.67674e-05
107398066	0.0258247	0.956345	0.197009
107399220	0.220332	0.84654	0.178534
107399107	-0.10323	0.707006	0.153403
107397561	0.21896	0.560161	0.125674
103314008	-0.190916	0.704414	0.152902
107397805	-0.268919	0.348169	0.0828431
107399072	0.813662	0.178231	0.0456089
107398574	-0.292854	1.27999e-15	9.78552e-16
107398681	0.335153	0.202218	0.0510429
107398150	-1.44893	0.109323	0.0292346
107398682	-1.24981	0.275939	0.0673356
107398253	-0.275509	1.99391e-53	3.26702e-53
107398381	-0.575605	0.0137189	0.00433859
107397969	-1.25401	0.00653822	0.00218305
107398930	-0.0254037	0.875916	0.183773
107397937	-0.261305	0.719549	0.15569
107399061	0.909847	0.0528152	0.0150326
107398525	0.944333	0.0013337	0.00049187
107397727	-3.38731	0.00249456	0.000884358
107398945	-5.01534	2.69382e-05	1.18709e-05
107398745	0.275604	0.0433065	0.0125405
107398327	-1.77064	0.105165	0.028212
107397559	-1.92788	0.181381	0.0462917
107399145	-0.334389	0.0066222	0.00220883
107398197	-0.391829	0.262306	0.0644134
107397653	-1.55351	2.59162e-237	1.32306e-236
107398662	-0.735237	0.407061	0.0950542
107399004	-0.857277	0.201301	0.0508403
107397503	-1.51284	0.329061	0.0787252
103315193	-2.51284	0.000840204	0.000317596
107399094	-3.51284	0.023433	0.00711866
107399054	2.07212	0.150858	0.039238
107397575	-0.342919	0.754379	0.161598
107398302	-0.705489	0.00306335	0.00107303
103314601	0.248702	0.000177696	7.23651e-05
107397528	4.85138	0.000118363	4.90009e-05
107398130	-0.825128	0.00129858	0.000479896
107398345	-0.415783	0.311744	0.0750664
103314586	0.805135	1.00886e-07	5.36348e-08
107397750	0.48864	0.204477	0.051568
107398951	0.00152528	0.989717	0.20258
103312290	-0.260457	0.482187	0.110324
107397758	-1.85388	0.00455101	0.00155844
107398077	1.11291	0.0215094	0.0065932
107398342	-0.120527	0.779521	0.166236
107397967	-0.353072	1.76059e-05	7.87535e-06
107398194	-0.150274	0.790848	0.16836
107398251	3.59568	4.42436e-06	2.08218e-06
107398671	-1.76438	8.63399e-06	3.96796e-06
107398045	-0.0578711	0.587252	0.130906
107398677	0.308283	0.555816	0.124802
107398953	-1.7426	0.00374483	0.00129625
107398211	-0.322599	0.042872	0.012425
107399264	-0.382439	0.0572662	0.0161949
107397432	0.557545	0.249557	0.0615854
103314466	-0.158207	0.209268	0.0526378
107398536	-0.20799	0.487917	0.111479
107398685	-0.0700769	0.167751	0.0431959
107398665	1.07212	0.531972	0.120054
103313013	-0.634032	0.120015	0.0318486
107399149	0.535838	0.422503	0.0983179
107398483	0.35042	0.216521	0.0542337
103313922	-0.36839	5.78235e-05	2.47158e-05
107399192	-0.448091	5.5902e-05	2.39363e-05
107397764	-0.604475	0.000233177	9.37425e-05
107397456	-1.09781	0.187438	0.0476686
107398422	-0.485877	0.00164209	0.00059777
107397728	-1.13734	0.000100568	4.1957e-05
103313924	0.657081	0.182276	0.0465007
107398001	-0.241143	0.150216	0.0391106
103313916	-0.69029	0.0113878	0.00365616
107398660	-3.83477	0.000216042	8.71114e-05
107397992	-0.927882	0.588567	0.13108
107398263	-0.309501	0.0001774	7.22624e-05
107398248	0.276477	0.340921	0.0813082
107398368	-2.01669	0.111007	0.0296446
103312463	-0.802351	0.262263	0.0644134
103314403	-2.2554	0.0930515	0.0252433
107398731	-0.449237	0.220023	0.0550068
103314241	-0.338547	0.0144558	0.00455955
103314334	0.0293124	0.931238	0.192908
107398630	-0.335688	0.00222152	0.000792784
107398639	-0.234831	0.0122188	0.00389994
107397485	0.102492	0.729147	0.157329
107399151	-1.02742	0.00523129	0.00177316
107397707	0.570924	0.0384951	0.0112487
107397630	-0.173437	0.118033	0.0313549
107399256	-0.0197323	0.937087	0.193808
107398539	1.07212	0.211301	0.0530484
107398275	-0.628321	0.0491602	0.0140683
107397863	0.516356	7.33608e-06	3.39121e-06
103314561	-0.199428	0.00042433	0.000165732
107398812	-0.910774	4.23034e-06	1.99356e-06
107398607	-0.153174	0.510615	0.116053
107399245	-0.451444	0.170452	0.0438223
103315230	1.33922	0.16019	0.0414648
107398419	-0.778583	0.202858	0.0511886
107398473	-0.735237	0.407061	0.0950542
107397637	0.0875898	0.406965	0.0950542
103312321	-0.227522	0.0216052	0.00661925
103315096	0.0414622	0.51485	0.116869
107398467	0.809084	0.269659	0.0660103
107398298	-0.128503	0.146347	0.0381844
107398247	1.07212	0.0982111	0.0265269
103314696	0.768992	0.00342039	0.00119161
107398579	-0.988657	9.019e-07	4.48144e-07
107397496	0.307502	0.0938355	0.0254369
107398019	0.809084	0.269659	0.0660103
107399123	0.487093	0.052029	0.0148277
107397601	-2.24981	0.0196857	0.00607489
103312977	0.566883	0.15558	0.0403546
103313414	-0.0352213	0.438247	0.101432
107399272	-1.28152	0.0171794	0.00535991
103313097	-0.314905	0.551716	0.12399
107398778	1.10607	0.00295653	0.00103784
107398152	-0.975187	0.0264269	0.00795413
107397634	0.0946313	0.355924	0.0844503
107398554	-5.94402	5.09906e-09	2.9425e-09
103313054	-0.927882	0.126032	0.0333047
103314999	-0.174522	0.492822	0.112468
107398528	2.28244	8.5169e-07	4.23883e-07
103314431	-5.42677	1.07194e-06	5.30158e-07
107398397	-0.735237	0.241	0.0596781
103314948	0.52124	3.41012e-06	1.62233e-06
107398937	-1.62832	0.0320746	0.00952
107397466	-0.175809	0.610805	0.135355
107399099	-1.04767	0.00256373	0.000906976
107398650	-0.512844	0.693979	0.150945
107397775	-0.616284	3.49178e-16	2.72043e-16
107397599	0.107742	0.736791	0.158664
107398624	-0.00603945	0.945534	0.195227
107398632	0.68879	0.145617	0.0380141
107398592	-0.494676	0.000773439	0.000293288
107398713	0.976117	1.31212e-17	1.07173e-17
107398950	1.11719	0.0213876	0.00655958
103312439	0.577862	1.11765e-48	1.71531e-48
107397532	-0.477981	2.989e-06	1.42949e-06
103314987	-0.00664478	0.98823	0.202309
107399042	-0.416546	2.74681e-06	1.31843e-06
103312706	-0.785863	0.0114539	0.00367611
107398689	7.46804	1.10549e-20	9.94723e-21
103313100	-0.294402	7.18076e-06	3.32349e-06
107398433	-0.827088	0.0123886	0.00394334
107397683	-1.53292	0.0701452	0.0195136
107398965	0.634948	1.09911e-16	8.70163e-17
107398498	0.0277242	0.938247	0.194015
107397989	0.858651	3.62415e-35	4.52173e-35
107398943	0.0721184	0.971798	0.199471
107399059	-0.794884	6.98067e-08	3.74863e-08
107397859	-1.80235	0.0342081	0.0100987
107398844	-0.664847	0.521269	0.11809
107398982	-3.24981	0.0451574	0.0130041
107398286	0.326691	0.206371	0.0520081
103313714	-0.598131	0.00156337	0.000571536
103312934	-0.0323383	0.640098	0.140935
107399142	-3.17663	4.94563e-06	2.31782e-06
103312597	-0.674252	0.116314	0.0309353
107397566	0.0926797	0.5098	0.1159
658000	0.080002	0.288668	0.0700647
107397586	-0.121699	0.0426356	0.0123623
107398860	-1.81196	0.151065	0.0392855
103313230	5.57101	5.51128e-07	2.78341e-07
107398894	-0.0481759	0.907934	0.189194
107399093	0.0357788	0.733666	0.158151
107398316	-0.425683	0.00133247	0.000491455
103314717	-0.364674	0.00948265	0.0030825
107398374	-0.484275	0.28109	0.068441
107398906	1.30398	0.0434828	0.0125841
107398252	0.809084	0.118505	0.0314735
107397996	0.355911	0.379453	0.0893404
107399257	-0.0210782	0.735614	0.158459
107398976	-0.980305	0.00188202	0.000678004
107398676	-2.73524	0.0291864	0.0087193
107398181	0.6072	2.35255e-12	1.60168e-12
107397507	0.00358698	0.966563	0.198713
107398794	-0.368454	0.302275	0.0729813
107397542	-0.175784	0.622057	0.137485
107398670	-3.63938	0.0163958	0.00513015
103312984	-0.120527	0.871601	0.183041
107398210	-0.0978066	0.888927	0.186096
107399105	0.0248026	0.754534	0.161624
107397993	0.228349	0.202089	0.0510181
107398831	-0.515189	1.29172e-07	6.81839e-08
103312888	0.582263	7.47094e-23	7.13689e-23
107398199	-4.09781	0.00343659	0.00119572
107398855	-0.504127	5.62401e-18	4.6487e-18
107399076	-0.592668	0.00131707	0.000486141
107399263	2.65708	0.0414952	0.0120616
103313499	0.333628	0.302657	0.0730492
107398626	0.138392	0.293835	0.0711777
107397822	0.651082	4.31007e-08	2.34878e-08
107398398	-1.24981	0.123373	0.0326513
107397773	-0.46757	0.000314027	0.000124498
107397636	0.402838	0.00849818	0.00278339
107399211	-0.135267	0.0207442	0.00637461
107399237	0.0721184	0.960125	0.197555
103314082	0.48864	0.204477	0.051568
103312385	-0.736634	0.0323423	0.00959596
107397661	0.157519	0.637089	0.140335
107397918	0.196107	0.385689	0.0906575
107397631	-0.951645	0.00811991	0.00266751
107398375	-0.862065	3.42844e-06	1.63041e-06
107398631	-0.262061	0.232536	0.0577927
103312275	-0.63658	4.42084e-05	1.91233e-05
107398870	-1.029	6.11821e-11	3.90278e-11
107398300	-0.0798847	0.702892	0.152626
107398708	0.918882	0.18355	0.0467868
103312913	0.916353	0.0296633	0.00884829
107398131	0.0806967	0.602617	0.133813
107399053	0.666862	0.0111899	0.00359994
107399246	-0.790378	0.135654	0.035625
107397531	-0.366522	0.0269688	0.0081053
107399026	-1.13392	3.31387e-27	3.53007e-27
107398404	-2.04134	9.9797e-77	2.09606e-76
107399208	-0.260883	0.000931795	0.000350728
107398431	-0.460754	0.00406662	0.0014004
107398623	-0.570066	0.165754	0.0427469
107398276	-0.383561	0.228682	0.0569216
107398189	-1.09781	0.187438	0.0476686
107398804	-2.73524	1.28926e-05	5.8423e-06
107398869	0.948834	6.96436e-07	3.48848e-07
107398765	-1.02185	2.06903e-08	1.15149e-08
107398998	-1.53497	3.12128e-06	1.49086e-06
107397534	-0.707113	0.000642708	0.000245809
103313072	-0.374095	0.000496311	0.000192434
103314408	-1.25683	6.81326e-07	3.41559e-07
107398297	-0.0980409	0.822541	0.174089
107398718	0.0958344	0.525666	0.118914
107397774	0.657081	0.475886	0.109076
107398879	-1.70946	6.02206e-09	3.46167e-09
103313302	-0.527442	0.00419037	0.00144091
107398845	0.401426	0.193236	0.0489651
103314158	-0.59773	2.00626e-10	1.24776e-10
107397848	-0.356725	0.336832	0.0804309
107398548	-1.51284	0.1675	0.043138
107398265	-0.151869	0.112825	0.0300758
107398698	0.163893	0.127788	0.0337212
107398111	-0.512844	0.127542	0.0336599
107397600	-2.52844	9.71241e-40	1.30777e-39
107398811	3.26767	0.120752	0.0320182
107399049	0.0233378	0.852184	0.179479
107397858	-0.342919	0.754379	0.161598
107398519	0.264763	0.722556	0.156154
107398315	-0.927882	0.0429788	0.0124537
107398580	-0.927882	0.588567	0.13108
107398983	-1.12257	4.18031e-151	1.4777e-150
103313937	0.00893954	0.946031	0.19532
107398825	1.40926	0.0382576	0.0111803
103312438	1.0131	7.30053e-18	6.01216e-18
107398292	-0.605954	0.0181626	0.00564506
103315187	0.0461232	0.86624	0.182052
107399016	-0.0472413	0.779995	0.1663
107397529	-0.441501	0.0508732	0.0145237
107397576	-0.540859	0.0352381	0.010379
107398991	0.67622	0.189103	0.0480445
107398942	-0.597733	7.68261e-09	4.39249e-09
107399229	-0.419417	0.0014629	0.000536451
107397850	-1.26575	2.67636e-06	1.28612e-06
107397853	-0.218657	0.207572	0.0522516
107397797	1.1876	0.0836129	0.0228972
107398424	-1.57936	1.12453e-14	8.33285e-15
658674	0.033747	0.00161536	0.000589179
656744	0.665239	4.61241e-62	8.41029e-62
657231	-0.218354	1.16945e-36	1.49645e-36
660689	-0.234296	7.64917e-06	3.53194e-06
660315	-0.108689	9.52679e-06	4.35903e-06
659357	0.995971	0	0
663448	0.112539	0.0479867	0.0137558
103314911	-0.787162	1.60501e-75	3.34663e-75
656843	-0.473623	0.0172959	0.00539283
655492	1.11221	0	0
103312446	-1.77701	2.49453e-90	5.89423e-90
663740	0.822463	1.52605e-278	8.86276e-278
658553	-0.233593	6.47989e-08	3.49081e-08
660739	2.83351	0	0
103313331	0.292384	0.1425	0.0372696
100142163	-0.631518	4.15644e-47	6.23637e-47
100142369	0.235664	7.62315e-05	3.22017e-05
656589	0.155803	1.19294e-13	8.53246e-14
103314464	-0.657524	7.92738e-11	5.03257e-11
662914	0.118475	8.42141e-06	3.87499e-06
100240681	0.0191731	0.205784	0.0518673
660461	-0.087458	0.00826133	0.0027116
663705	-0.225473	1.59298e-05	7.15373e-06
100142186	3.23633	1.0323e-224	4.9744e-224
659174	-0.0982866	1.1752e-09	7.02003e-10
659205	-0.0568892	0.545655	0.122819
656247	-0.512844	0.693979	0.150945
107399017	-0.237017	0.75337	0.161438
103313300	0.112069	1.29339e-06	6.36215e-07
656873	-0.193839	2.467e-10	1.52848e-10
655685	0.22746	8.20887e-129	2.56146e-128
660567	-0.342919	0.000103331	4.30362e-05
656636	-0.370971	4.84764e-19	4.13904e-19
658726	0.470305	1.91689e-36	2.44396e-36
641592	-3.07038	0	0
654513	0.0941132	0.0345455	0.0101899
664315	-0.0268603	6.74588e-08	3.62692e-08
664530	-0.309033	4.50851e-16	3.49968e-16
663436	1.32588	0	0
100142102	-0.309384	2.99006e-15	2.25422e-15
107398712	-1.60595	0.0185517	0.00575104
656465	-0.0817476	0.351195	0.0834821
657636	0.279093	8.13791e-09	4.64142e-09
658498	-0.044489	0.000197218	7.99361e-05
658376	0.0372693	0.442572	0.102346
660058	-0.00716375	0.400929	0.0938416
658532	-0.397674	3.34314e-09	1.94921e-09
659407	-0.326615	8.84466e-19	7.4995e-19
662644	-0.316579	4.73124e-06	2.22106e-06
641546	0.309262	0	0
656881	0.415959	2.96667e-96	7.38402e-96
107397623	-0.0916229	0.781271	0.166557
103313043	-0.0700563	0.299449	0.0723907
663488	0.0872144	0.024402	0.00738736
103313372	-0.0899364	0.0347005	0.0102293
103314784	-0.681444	2.82552e-05	1.24311e-05
107397691	-2.55745	4.12808e-80	8.93872e-80
103313207	-0.0824513	0.136873	0.0359096
658388	-0.0356091	0.395451	0.0926968
100142578	-0.317662	2.13455e-10	1.32535e-10
100142128	0.206042	7.76702e-06	3.58264e-06
662699	-0.835204	6.09249e-06	2.83535e-06
103315031	-0.316688	9.79921e-20	8.5655e-20
662950	-0.546727	4.09888e-19	3.51198e-19
659414	-0.374937	2.38042e-20	2.1201e-20
103312482	0.555467	2.48267e-47	3.73648e-47
103312161	-0.363192	6.1885e-08	3.33862e-08
107399195	0.092597	0.864709	0.181796
103312809	-3.22547	0	0
664342	0.259193	1.66574e-08	9.32237e-09
657378	0.394104	1.51591e-30	1.73241e-30
661779	-0.551183	9.90631e-50	1.54163e-49
103314553	0.163646	0.00728721	0.00241394
103314918	-0.106079	0.00579219	0.00195476
663631	-0.0681107	1.09879e-06	5.43002e-07
659994	-0.165863	2.85108e-11	1.84782e-11
100302298	0.0107178	0.979683	0.200786
103312838	0.234051	7.03336e-12	4.68365e-12
662512	-0.0214976	0.441616	0.102149
103313566	-0.725693	1.16933e-08	6.59772e-09
659725	-0.0688068	0.00391118	0.00135049
661531	-0.0976783	0.000491072	0.000190493
103314509	-1.03876	2.68171e-19	2.30905e-19
661144	-0.396986	8.71854e-11	5.52265e-11
663736	-0.388562	2.35793e-05	1.04433e-05
663998	-0.126065	1.65731e-11	1.08678e-11
662164	0.32685	4.27889e-12	2.87916e-12
103312291	0.208538	0.249572	0.061586
663565	-0.282977	1.08196e-13	7.75338e-14
664162	0.128185	9.99238e-05	4.16989e-05
103314321	1.29451	0.174326	0.0447148
663763	0.190524	0.00718884	0.00238484
656203	0.157646	6.2877e-09	3.60971e-09
656329	-0.322117	8.77564e-20	7.68452e-20
661291	-0.492613	0	0
659637	0.0874986	0.019744	0.00609212
657973	-0.530356	9.68394e-66	1.8387e-65
662575	-0.173152	0.134191	0.0352778
660658	0.39822	9.74228e-222	4.66243e-221
663833	-0.0528566	5.18067e-17	4.1417e-17
658131	0.499934	3.52984e-104	9.32121e-104
664414	-0.0921754	0.0549799	0.0155938
103312974	-0.982329	0.037132	0.0108773
660522	0.154312	0.017527	0.00545967
656322	-0.209224	0.000795309	0.000301301
657486	1.11794	4.94123e-06	2.31608e-06
662449	0.0944604	6.80733e-23	6.50803e-23
660742	-0.54761	0.00680125	0.00226439
661688	-0.288343	1.98999e-14	1.46264e-14
656008	-0.406827	1.13625e-98	2.89432e-98
659677	-4.81602	1.76518e-206	8.0391e-206
658668	-0.123904	0.068306	0.0190572
107397880	0.202067	0.00113366	0.000422198
660682	0.340808	7.43369e-49	1.14375e-48
103314188	-0.0508514	0.39467	0.0925246
664117	0.36131	1.97046e-36	2.5116e-36
103314352	-0.436454	0.000142512	5.85776e-05
655832	0.00559033	0.653009	0.143384
103314985	0.518444	1.34514e-64	2.52128e-64
654938	0.0886065	0.41645	0.0970017
103314063	-0.189762	0.457026	0.105216
103313029	0.241329	2.60414e-10	1.61202e-10
657193	0.209995	5.15696e-17	4.12341e-17
663667	-0.36234	6.18446e-30	6.9862e-30
655053	-0.0199274	0.446564	0.103128
103313891	-0.15213	0.0454124	0.013073
103313103	-0.26967	0.158659	0.0411012
659272	-0.0507751	0.287833	0.0698793
107399008	0.0994201	0.695568	0.15125
659862	-2.99968	4.50525e-141	1.51075e-140
659796	-0.366003	0.0619425	0.0174028
100142619	0.00734632	0.96841	0.199025
662832	-0.327284	2.53874e-27	2.71027e-27
100141725	-0.337804	9.69285e-41	1.32333e-40
664090	0.568562	0	0
662562	0.235735	1.40967e-18	1.18583e-18
662240	-0.195106	3.85128e-19	3.30157e-19
107398578	-0.628321	0.325312	0.0779655
107398029	0.867699	0.115902	0.030834
100142401	-0.331928	5.20808e-09	3.00258e-09
661217	0.0738547	0.0196178	0.00605965
662559	-0.256719	2.42925e-21	2.23054e-21
663883	-0.552624	0.000171076	6.97792e-05
656016	-0.216075	1.5696e-22	1.48608e-22
660635	-0.0603689	0.00302863	0.00106155
661480	1.06707	1.51482e-182	6.28502e-182
656001	0.261269	1.30474e-05	5.91078e-06
107398582	-0.512844	0.693979	0.150945
661919	-0.27898	5.95876e-09	3.42609e-09
655455	-0.0104623	0.41049	0.0957635
103314198	-0.499302	3.47899e-13	2.45109e-13
103315023	0.135037	0.00035419	0.00013963
103312226	-0.410247	6.28988e-25	6.34018e-25
659670	-0.00249422	0.923502	0.191695
663651	0.158089	1.29076e-66	2.47624e-66
657017	0.156423	0.0013581	0.000500003
661309	0.302731	0.00278123	0.000979742
107398541	1.02611	3.53654e-158	1.29598e-157
103313867	0.233081	0.771681	0.164825
657246	-0.850654	8.06126e-71	1.60891e-70
662838	-0.36458	0.000635787	0.000243371
100141968	-0.000899625	0.987785	0.202228
655966	-0.454201	1.35267e-17	1.10448e-17
103312814	-0.379378	0.00112391	0.000418694
660353	-0.162914	3.70031e-13	2.60327e-13
660775	-0.25007	2.14035e-38	2.82296e-38
107397705	-0.409893	5.53322e-37	7.1289e-37
103314685	0.507214	0.00272146	0.000960001
100142152	-0.286946	3.7501e-94	9.17079e-94
662502	-0.290319	0.136011	0.0357025
103312868	0.114444	3.39356e-08	1.86134e-08
656365	-0.183283	4.12234e-14	2.99397e-14
656136	0.101462	0.295453	0.0715022
662174	-0.0677053	0.153181	0.0397811
658339	-0.32898	0.00818144	0.00268682
103313820	-0.132897	0.00127059	0.000470226
663167	-0.275623	3.96793e-27	4.21763e-27
657795	-0.637959	1.33083e-101	3.44556e-101
661298	0.292934	1.51564e-08	8.4998e-09
662370	0.220762	0.0744867	0.0206194
657059	0.183047	9.00333e-20	7.87968e-20
659382	-0.332854	1.45563e-24	1.45559e-24
656807	-0.238339	8.74462e-27	9.21487e-27
659248	-0.222746	1.93957e-28	2.12482e-28
656830	-0.153205	0.0641261	0.0179668
657187	3.18179	0	0
662863	-0.255608	9.44967e-11	5.97406e-11
655476	-0.626792	1.83043e-28	2.00615e-28
103315157	0.0118814	0.76044	0.162697
663618	-0.203533	2.14682e-46	3.18886e-46
663302	-0.244921	3.44197e-08	1.88726e-08
661631	0.275426	0.0102453	0.00331611
663116	-0.281871	8.84686e-05	3.71338e-05
654951	0.257811	4.19252e-61	7.53245e-61
657852	0.450601	0	0
103312451	-2.4886	2.14631e-25	2.19145e-25
664392	0.541574	2.61925e-08	1.44751e-08
661677	-0.0307278	0.241546	0.0597988
656913	0.466048	9.61223e-97	2.40593e-96
656536	-0.516984	1.31646e-13	9.40354e-14
660976	0.0190916	0.625443	0.138099
662401	0.0653551	0.0612514	0.0172264
657156	-0.381997	0.00770732	0.00254271
659708	-0.0773588	0.00891482	0.00290932
655465	-0.25132	0.550338	0.123709
655460	0.0753016	0.0376023	0.0110026
662082	-0.265842	0.0287263	0.00859759
100142416	-0.958432	2.95194e-130	9.29404e-130
656582	0.529591	4.21261e-06	1.98553e-06
656899	-0.0227035	0.164383	0.0424223
662379	-0.112021	8.85807e-06	4.0656e-06
107398337	-4.73524	0.000159576	6.52625e-05
663182	-0.44439	5.16051e-144	1.75941e-143
107397394	-1.37819	2.55467e-18	2.13216e-18
656902	0.0909891	0.0739066	0.0204681
661296	0.609384	0.00298773	0.00104804
662387	-0.253131	5.57609e-20	4.91886e-20
656977	-0.189374	0.0152474	0.0047938
107398588	-0.329217	0.00849307	0.00278206
662924	-1.07837	2.7789e-231	1.37842e-230
663932	-0.0755979	0.000199356	8.07491e-05
103313002	-0.106747	0.2555	0.0629189
658593	0.0117927	0.852936	0.179591
661678	0.0108273	0.604304	0.134139
654847	0.109341	0.00721899	0.00239354
103313039	0.156877	1.49871e-06	7.34037e-07
107398250	-3.51284	0.023433	0.00711866
654930	-0.197661	1.58916e-17	1.29412e-17
100306946	-4.61606	0.000311651	0.000123636
657961	0.0429926	7.45865e-05	3.15335e-05
656597	-0.725557	5.71452e-36	7.23678e-36
655789	-0.2221	4.31937e-28	4.69828e-28
661664	0.453726	9.44029e-154	3.39341e-153
663082	-2.02793	9.78722e-44	1.40271e-43
658636	-0.0842523	2.20499e-10	1.36823e-10
656429	0.540078	6.7435e-15	5.03356e-15
660697	-0.299512	4.17601e-14	3.0325e-14
660540	-0.836634	0	0
660186	-0.176142	3.55659e-07	1.81835e-07
659617	0.0438275	0.353317	0.0839173
658518	-0.253076	1.12903e-18	9.51714e-19
661333	-0.842412	8.83882e-77	1.85723e-76
660479	-0.56187	0	0
659030	0.468687	1.12992e-126	3.47699e-126
656839	0.139483	2.87547e-07	1.47985e-07
662306	-0.624759	2.73089e-120	8.02522e-120
663878	0.376165	1.0635e-10	6.69761e-11
103314179	0.0251209	0.878746	0.184272
661337	0.113049	0.0816954	0.0224155
100142235	0.358922	1.72043e-17	1.3994e-17
656293	-0.261774	4.197e-23	4.04167e-23
100142411	1.99812	0.00222857	0.000795012
659839	-0.0237811	0.423397	0.0984885
656919	0.614485	2.64125e-305	1.66853e-304
103315243	0.144527	0.402787	0.094227
662398	-0.705489	0.295109	0.0714325
103314659	-0.413748	0.00134378	0.000495253
103313949	-0.610399	1.34273e-09	8.00023e-10
659479	0.887694	1.42054e-179	5.81016e-179
100141914	0.0721184	0.930992	0.192874
654908	-0.209773	8.23744e-26	8.49215e-26
103314479	-0.391935	6.96234e-155	2.51376e-154
103312881	-0.206735	6.46537e-09	3.70823e-09
663201	-0.0495807	0.13568	0.035627
103312330	0.0572673	0.123424	0.0326611
659549	-0.0960173	0.00124335	0.0004607
659009	-0.383827	0.0304225	0.00906316
100142366	0.495617	0.015931	0.00499395
657326	-0.238281	4.31573e-43	6.12085e-43
103315198	1.62964	1.73201e-08	9.67996e-09
103312342	-1.20799	0.0504867	0.0144226
656710	-0.815154	0.00126915	0.000469728
660785	0.629673	0.000601127	0.000230862
659310	-0.0143174	0.727234	0.157018
657504	0.859791	2.38687e-39	3.19545e-39
103313383	3.01483	0	0
107398417	0.809084	0.435074	0.100793
664375	0.106871	0.0053783	0.00182085
663852	-0.3809	1.75121e-52	2.82492e-52
655659	-2.12037	8.13901e-296	5.01856e-295
664496	0.0498999	0.0322272	0.00956298
662705	0.144152	0.0127754	0.0040583
655913	-0.3068	5.94031e-270	3.36218e-269
661010	-0.640518	1.94266e-26	2.03226e-26
103313362	-0.266684	0.161471	0.0417566
100142550	-0.260765	6.94255e-06	3.21689e-06
100141825	-0.164322	0.0233651	0.0071108
100141847	-0.294919	0.00185588	0.000669127
658491	-0.158873	1.89458e-21	1.7455e-21
107397396	-0.818983	4.37996e-58	7.57188e-58
659222	-0.233404	3.75788e-80	8.1407e-80
103312455	0.322183	6.29218e-56	1.06373e-55
662632	1.04369	1.50046e-34	1.85132e-34
103314361	0.00681387	0.944717	0.195073
664368	-0.0107025	0.537747	0.12119
659577	-0.166635	0.0206462	0.00634528
664487	0.226658	1.63461e-61	2.95742e-61
655095	0.0108667	0.841902	0.177683
657397	-0.450947	1.01475e-22	9.66356e-23
656627	0.159443	4.81268e-10	2.93609e-10
660075	0.280491	0.110184	0.0294425
655931	0.543619	1.46284e-64	2.7398e-64
103314378	0.173441	1.67833e-05	7.52319e-06
662552	0.0574361	0.200902	0.0507525
103313092	0.548256	8.34353e-13	5.77856e-13
657533	-0.475786	1.1699e-22	1.11152e-22
663173	-0.0311184	0.413137	0.0963031
657155	0.249155	2.5731e-06	1.23869e-06
658105	0.0306543	0.35697	0.0846656
658412	0.319233	3.31084e-44	4.77729e-44
657999	0.267033	0.146331	0.0381821
661499	0.019421	0.846569	0.178534
662687	-0.404506	2.23976e-131	7.09284e-131
660311	-0.232407	9.12421e-21	8.24031e-21
655011	-0.639474	2.72651e-06	1.30907e-06
664226	0.115283	5.74392e-05	2.45623e-05
662627	-0.0262691	0.31574	0.0758867
662986	0.249085	1.40418e-11	9.23146e-12
664095	-0.342285	1.7604e-28	1.93027e-28
659609	-0.104759	0.421941	0.0982045
103315222	0.3633	0.000920276	0.000346606
660799	0.08396	0.431368	0.100057
103314471	-0.228286	1.39006e-30	1.58933e-30
658520	-1.32025	1.8147e-185	7.67892e-185
655196	0.505772	1.56754e-07	8.22556e-08
661503	-0.93429	7.60117e-15	5.66167e-15
657264	0.00881179	0.894958	0.187103
657522	0.00461616	0.797922	0.16959
656457	-0.118046	0.14908	0.0388355
658621	-0.106219	0.00808682	0.00265735
107398734	-0.424549	0.00352597	0.00122517
100141682	-0.457059	3.0689e-31	3.55198e-31
100141618	-0.228541	0.285182	0.069294
659593	-0.172734	0.100318	0.0270051
663509	0.33043	0.0282191	0.00846132
103314831	-0.192913	2.40479e-10	1.49069e-10
103313884	-0.140543	0.187488	0.0476789
663502	-0.186243	3.49405e-12	2.35819e-12
656067	-0.315322	3.15353e-16	2.4616e-16
662569	-0.48872	0	0
103313065	-1.70376	0	0
107398244	1.42016	5.06303e-05	2.178e-05
103315019	-0.00864265	0.93779	0.193937
103313052	-0.645715	1.02807e-15	7.88789e-16
103314030	-0.00743884	0.865492	0.181921
103313611	0.109475	0.0553913	0.0157019
659777	-0.117641	0.01114	0.0035853
656506	2.55938	1.45638e-46	2.16856e-46
103313627	-0.111926	0.579505	0.129391
103313645	1.04446	2.5992e-14	1.901e-14
103313707	-0.0463573	0.457565	0.105326
662601	0.0324037	0.0806177	0.0221525
656160	-6.22397	1.33342e-10	8.35772e-11
662936	0.0242041	0.247871	0.0612125
655400	0.201761	3.98198e-08	2.17434e-08
103313446	0.529467	0.00161211	0.000588125
659700	-0.62436	7.86497e-45	1.14362e-44
107397667	-0.628321	0.325312	0.0779655
103314047	-0.376584	7.868e-50	1.2256e-49
100142249	0.336041	1.56491e-101	4.04517e-101
657529	-0.708753	1.92448e-194	8.41999e-194
107399125	-0.168698	0.0381828	0.0111592
654920	-0.125614	5.84743e-10	3.55099e-10
659740	-0.041109	0.40684	0.0950389
662988	0.0917918	0.345245	0.0822474
103314542	4.28351	0	0
663749	-0.0872835	0.000704556	0.000268185
656997	-0.378519	7.33467e-117	2.10366e-116
103315256	0.942083	3.66465e-203	1.6536e-202
100216359	-0.0982943	0.171482	0.0440662
103314643	-1.15342	2.73385e-05	1.20429e-05
103313167	0.326314	1.18292e-73	2.43132e-73
660308	0.56405	0	0
100142259	-0.487101	0.000192224	7.80281e-05
659491	-0.537279	2.90222e-20	2.58014e-20
103312186	0.322989	1.67038e-58	2.89895e-58
659314	0.289093	2.03273e-126	6.24336e-126
660436	1.36877	1.6096e-104	4.25735e-104
655033	-0.0957315	1.43332e-05	6.46518e-06
103313352	-0.504939	0.0326358	0.00967366
103313911	0.278569	0.609846	0.13518
107397961	-1.07472	0.0161891	0.00507097
656817	-0.163645	2.86106e-39	3.82191e-39
657274	-0.925592	0	0
656240	0.0543634	0.683517	0.149046
103315182	-0.233953	8.58958e-06	3.94903e-06
655952	-0.394696	2.40975e-86	5.49499e-86
660469	0.0666319	0.0789663	0.0217659
103314663	0.205317	3.1793e-16	2.48093e-16
663752	0.138917	3.13425e-06	1.49662e-06
661173	0.734642	0	0
657064	-0.475532	2.92323e-35	3.6528e-35
660097	0.383232	2.68144e-35	3.35667e-35
663512	0.513485	3.6785e-137	1.20464e-136
657859	-1.2625	8.02033e-119	2.3345e-118
659141	-1.00231	8.41361e-150	2.94647e-149
656796	0.227029	8.28013e-230	4.0701e-229
107398474	-0.26663	0.000498155	0.000193103
657940	0.234228	1.3947e-12	9.57272e-13
107398834	-0.991538	6.94913e-05	2.94766e-05
657558	-0.904423	4.99512e-67	9.62808e-67
103314483	-9.16073	9.93994e-56	1.67462e-55
659877	-0.557346	0	0
103313022	0.185329	0.0059314	0.00199884
103314052	-8.19214	1.32284e-32	1.57961e-32
655695	-1.19512	1.1138e-139	3.70447e-139
103312719	-1.19016	0.0400095	0.0116554
655781	-0.107802	0.00436977	0.00150005
664482	-0.108233	0.000687723	0.000262002
107399259	0.271099	0.101176	0.0272181
661601	0.372038	1.0069e-11	6.66439e-12
100142240	0.161694	0.00254834	0.000901856
655168	-0.192332	8.61598e-40	1.16109e-39
103313961	2.02234	0.0255752	0.00771581
103313576	-0.0737036	0.251176	0.0619505
663499	0.841253	0.00767055	0.00253143
660030	-0.335796	1.21752e-11	8.02908e-12
658803	1.59816	9.93712e-157	3.61446e-156
107397417	-0.161454	0.0976169	0.0263824
659556	0.116626	1.32831e-08	7.47238e-09
658827	0.088169	0.13956	0.0365538
100141576	-0.0428098	0.209454	0.0526712
100142532	0.334458	0.00141514	0.000519971
659076	0.330084	0	0
663101	-0.0711972	0.0174484	0.00543727
655188	-0.214628	1.29542e-269	7.32351e-269
661376	0.367246	0.808856	0.171593
659654	0.230532	6.80222e-07	3.41075e-07
658684	0.53357	3.08733e-123	9.22215e-123
664045	0.256343	2.57345e-13	1.81938e-13
657104	0.118502	0.0184028	0.0057085
103313602	0.501596	1.36203e-14	1.00623e-14
103312774	-0.465612	8.64979e-22	8.0311e-22
655271	-0.212207	0.000169829	6.92881e-05
664383	-0.0801234	1.98695e-06	9.642e-07
663463	3.53155	0.00161731	0.000589668
656721	0.93022	7.63027e-27	8.05794e-27
655736	1.44438	0	0
103314592	-0.0486177	0.28141	0.0684897
664100	0.771722	0	0
663597	0.0818663	0.167312	0.0431213
657563	-0.180917	1.46513e-25	1.50221e-25
103313310	-0.0265227	0.675094	0.147505
658604	-0.207655	2.05273e-16	1.61107e-16
664088	-0.191853	2.84454e-10	1.75639e-10
664468	-0.46696	2.12422e-13	1.50722e-13
659400	0.0883216	0.0372373	0.0109068
662977	-0.304439	2.75949e-135	8.95296e-135
656401	0.000741848	0.947594	0.195585
661076	-0.214271	0.0427305	0.0123876
100141542	-0.245069	8.21546e-09	4.68456e-09
664205	0.163417	2.04283e-05	9.1021e-06
657455	-0.316976	1.11875e-117	3.23331e-117
103313099	0.244574	1.99301e-07	1.03726e-07
103312153	-1.11494	1.71696e-09	1.01779e-09
663445	-1.56531	1.48419e-42	2.08384e-42
659536	0.400994	1.26766e-264	7.07671e-264
659736	0.300331	2.55279e-53	4.17715e-53
103313607	0.395883	0.000275535	0.00010995
661907	0.286627	7.61341e-45	1.10737e-44
107397608	-0.0511709	0.835059	0.176441
103314834	0.15083	0.0829752	0.0227365
103313210	0.166658	3.4708e-11	2.23998e-11
107397427	0.299558	0.275578	0.0673013
661928	0.0252397	0.7709	0.16469
656759	0.012243	0.456091	0.105026
660517	-0.0325763	0.206452	0.0520161
663822	0.671818	0	0
663731	0.175398	1.05947e-26	1.11309e-26
659468	-1.06115	2.14553e-61	3.87751e-61
655637	0.15699	5.7167e-05	2.44523e-05
103313496	0.620709	2.82739e-62	5.17862e-62
103315000	-0.68461	0.0393518	0.0114788
662871	0.170508	1.64025e-96	4.09298e-96
658833	-0.231368	3.83786e-07	1.95766e-07
103314095	-0.260033	8.06449e-29	8.9065e-29
100142335	-0.0316173	0.439385	0.101686
656575	-0.0866247	0.000129856	5.35551e-05
659804	0.0263385	0.259053	0.0637199
659363	-0.221888	2.83488e-12	1.92099e-12
664540	0.16877	5.49599e-12	3.67991e-12
663055	-0.211311	9.34174e-37	1.19696e-36
658939	-0.128243	0.0197834	0.00610349
103313460	-0.128608	4.19206e-08	2.28574e-08
655083	0.302591	7.08217e-25	7.13293e-25
658773	-0.228401	4.11628e-47	6.17801e-47
103312160	-1.11139	4.71132e-20	4.16728e-20
664553	0.151761	2.66485e-05	1.17453e-05
655419	0.00551817	0.715511	0.154933
100141837	-0.182303	0.0134743	0.00426675
662435	-0.329052	5.62082e-63	1.03532e-62
655144	0.459045	2.56847e-216	1.20448e-215
103312302	0.023705	0.212059	0.0532278
107398900	-0.885118	0.0420895	0.012224
103314668	-0.282839	0.000431206	0.000168283
100142338	-0.0671229	0.273354	0.0668146
107398849	-0.18215	2.78508e-11	1.806e-11
658457	0.00898044	0.926041	0.192027
655985	0.15671	2.06449e-13	1.46591e-13
657660	-0.50446	5.55704e-159	2.04559e-158
660581	-0.0393327	0.346764	0.0825587
659831	-0.219596	4.00589e-17	3.21565e-17
658023	0.338707	4.10899e-137	1.34472e-136
658511	0.168434	9.53157e-06	4.36081e-06
103313141	-1.18794	1.42184e-29	1.59403e-29
657133	1.02976	0	0
655304	0.048794	0.29492	0.0714263
103315044	-0.190916	0.661345	0.144831
103314546	-0.760366	5.17969e-32	6.10323e-32
656142	-0.347849	1.50796e-15	1.15014e-15
654846	-0.315729	1.82313e-27	1.95056e-27
660809	-0.492145	0.00400719	0.0013811
107398928	-0.662118	5.24627e-34	6.41962e-34
103313778	-0.0822098	0.572406	0.128081
103312625	-0.0811279	0.325337	0.0779675
103314247	0.326959	7.6099e-08	4.07892e-08
107397602	-1.66485	0.0561334	0.0158938
664528	0.118291	5.23294e-08	2.83811e-08
658296	-0.140499	4.0137e-10	2.45692e-10
658927	0.0721184	0.943632	0.19489
664043	0.763996	0.127925	0.0337485
658056	0.0821831	0.035513	0.0104524
103312726	-0.668238	1.19964e-06	5.91348e-07
107398062	-0.504686	1.65912e-35	2.08276e-35
661743	-0.172157	5.22864e-24	5.15167e-24
103314498	-0.266162	0.0546013	0.0154977
656754	8.61104	2.96201e-39	3.9546e-39
661255	-0.291378	0.454069	0.104654
658998	-0.463496	1.63702e-15	1.24702e-15
107398076	1.32005	0.0230802	0.0070285
103313796	1.64524	2.66466e-31	3.09141e-31
664447	-0.0475875	0.000390363	0.000153174
658342	-0.189205	3.33574e-05	1.45893e-05
663682	0.140516	9.45068e-11	5.97406e-11
103313788	-0.0193534	0.561095	0.125832
103312541	-0.0834753	0.00126698	0.00046903
655871	-1.15801	0.0189291	0.00586174
661625	-0.215478	2.70398e-06	1.29863e-06
661113	-0.16211	0.000132258	5.45228e-05
662807	0.00928575	0.508913	0.115752
107398907	-1.2565	0.255549	0.0629278
103314761	-0.826002	0.102966	0.0276784
662690	-0.128955	9.28306e-06	4.25268e-06
660365	-0.507752	2.1572e-09	1.27107e-09
656253	0.294072	1.86722e-56	3.17527e-56
659672	-1.26342	2.72667e-108	7.42455e-108
103313170	0.343055	5.51898e-230	2.71558e-229
662714	-0.490291	3.57413e-117	1.0275e-116
662092	0.189429	4.69118e-15	3.51666e-15
107399080	-0.33867	0.100272	0.0269957
100141526	-0.342919	0.376193	0.0886922
657833	-0.273534	7.63423e-05	3.22457e-05
103312659	0.0758479	0.205292	0.0517493
103314600	0.305478	3.6087e-15	2.71392e-15
659505	0.301288	0	0
662084	-0.120038	0.00198883	0.000714118
655355	0.230351	2.98106e-05	1.30907e-05
107397767	2.77256	0.00214749	0.000767542
664109	-0.584717	3.5419e-53	5.78212e-53
663600	0.156319	2.08768e-05	9.296e-06
107397862	8.54705	1.18439e-262	6.55951e-262
103312508	1.88542	3.31074e-62	6.05035e-62
100142513	-0.54021	3.10849e-06	1.4849e-06
663595	-0.103352	0.0457469	0.0131576
664395	-0.903959	2.20544e-05	9.80341e-06
103313751	-1.15048	6.7583e-07	3.38942e-07
107398237	-0.227442	0.671994	0.1469
655715	-0.0629479	0.385732	0.0906617
103315088	-0.950349	9.94493e-17	7.87845e-17
103313558	0.077387	3.22778e-06	1.53858e-06
664253	-2.36398	3.15645e-13	2.22641e-13
103314975	-0.675116	0.0462297	0.0132856
103312253	-0.0602754	0.0132574	0.00420105
660488	-0.0215825	0.432201	0.100232
662558	-1.59477	2.10744e-107	5.69724e-107
657223	0.330954	7.1792e-26	7.41524e-26
663863	-0.747165	3.55519e-39	4.7401e-39
659982	1.07721	0	0
659610	0.0385428	0.6096	0.135168
659715	-0.0372315	0.226429	0.0564266
660896	-0.398335	0.0504865	0.0144226
107398729	-0.765773	0.00671578	0.0022373
662198	-0.422421	7.92244e-58	1.36478e-57
660626	-0.060126	0.0945672	0.0256133
663626	-0.069942	0.12063	0.0319901
661643	-0.259047	2.47468e-28	2.70438e-28
655373	-0.77262	6.26362e-243	3.27625e-242
658887	0.989656	0.0879668	0.0239862
663196	0.346996	0	0
103314338	-1.45182	1.67499e-05	7.50962e-06
664473	2.01626	0	0
660663	-0.637611	3.04754e-33	3.67313e-33
107397982	-1.44681	2.2044e-112	6.16708e-112
659531	-0.173733	0.00323091	0.00112873
664388	0.003294	0.904005	0.188559
103313899	0.561774	0.000292161	0.000116253
662341	-1.78228	2.3504e-41	3.23326e-41
100141622	-0.775879	0.0879666	0.0239862
660017	2.2933	0	0
103314939	0.450066	8.87058e-10	5.33854e-10
663928	-0.257076	1.23388e-08	6.95472e-09
100141894	-0.384961	0.000645119	0.000246712
661788	-0.369239	9.05133e-130	2.84428e-129
655532	-0.644089	0.0205262	0.00631267
658337	0.105678	0.0003675	0.000144644
657547	-0.0519907	0.592257	0.13177
103312751	-0.400367	1.8475e-33	2.23667e-33
103314874	0.893579	5.72051e-16	4.42724e-16
663321	0.475189	3.99467e-121	1.18028e-120
103313542	-0.615988	3.51184e-06	1.66845e-06
662549	-0.104068	4.06399e-33	4.88262e-33
660749	-1.53902	0.00176502	0.000639382
663948	-0.549494	3.20149e-78	6.81774e-78
657623	0.0328826	0.00174952	0.000634097
662831	2.89459	0	0
107398741	-0.0869481	0.874287	0.183534
100142524	-0.151544	5.93374e-09	3.41211e-09
661542	0.70142	7.92216e-19	6.72429e-19
660690	-0.270061	2.17181e-28	2.37605e-28
659123	0.720069	0	0
663106	0.16302	2.02896e-15	1.54198e-15
662972	0.251233	2.45968e-13	1.74045e-13
660706	-0.0399172	0.000314452	0.000124656
663017	-0.351064	8.13656e-08	4.35454e-08
661231	0.0892228	0.104859	0.028133
656111	0.0923749	4.51831e-06	2.12558e-06
103315017	1.79209	2.30026e-14	1.68665e-14
662327	0.0130034	0.730132	0.157514
655792	-0.587542	0.000148743	6.10157e-05
661028	0.111289	0.566344	0.126869
655723	-0.174228	9.52074e-10	5.72138e-10
107398674	-1.28112	5.97238e-67	1.14982e-66
663664	-0.279988	0.10567	0.0283337
661637	0.0862295	0.000166441	6.79623e-05
662509	-0.401936	6.68868e-30	7.54881e-30
103312178	0.636903	0.00461703	0.00157741
658484	0.293342	2.64244e-09	1.54952e-09
660157	-0.683078	1.25301e-12	8.62077e-13
663719	0.228205	1.3202e-34	1.63096e-34
660043	1.03547	1.00165e-73	2.06133e-73
107398700	-0.532262	2.61454e-08	1.44506e-08
655915	3.48054	8.75153e-26	9.01265e-26
654963	-0.614339	1.35449e-34	1.67289e-34
660986	-2.28311	0.0020959	0.000750253
655154	-2.12369	1.68802e-09	1.00113e-09
103313108	-1.26814	3.1591e-54	5.21986e-54
103313128	2.11215	2.20286e-147	7.60032e-147
662320	0.0254792	0.319853	0.0768151
100141906	-0.189241	1.25786e-17	1.02844e-17
663160	0.327223	6.2655e-38	8.18652e-38
659757	-0.73797	7.17003e-56	1.21046e-55
660233	0.0140331	0.820109	0.173649
659632	-0.196932	0.008447	0.00276854
658755	-1.07611	0	0
658332	0.206857	2.00661e-06	9.73351e-07
103313669	0.367063	2.21375e-30	2.52344e-30
662200	-1.16956	6.21647e-61	1.11483e-60
658559	-0.469622	1.16704e-149	4.07826e-149
664297	0.457409	8.47373e-16	6.52501e-16
662022	0.0809371	0.0200426	0.00617374
656762	0.148612	1.07e-28	1.17826e-28
103312731	-0.372293	6.63561e-138	2.1862e-137
655172	-0.375059	3.93732e-07	2.00671e-07
107398695	0.294511	0.713224	0.15452
107398977	-0.380394	0.127843	0.0337302
660103	-0.152481	0.00243322	0.000864427
660165	-1.19066	9.9457e-112	2.76977e-111
660122	-0.470548	3.27477e-171	1.29296e-170
659525	0.46496	0.00523014	0.00177307
661409	0.282002	4.05501e-57	6.94635e-57
107397944	0.395223	6.2159e-22	5.79218e-22
103312365	-0.915968	8.64827e-12	5.73876e-12
100141539	0.41948	2.95409e-07	1.5192e-07
661588	0.290284	6.59343e-12	4.39728e-12
655123	-0.764383	0.000290051	0.000115488
103312555	0.782201	9.75326e-26	1.00316e-25
663354	-1.77106	0	0
103313120	-0.0224151	0.739535	0.15917
656848	0.116911	0.000346587	0.000136731
103313429	-0.08884	1.09755e-18	9.25972e-19
657675	0.472656	0.214326	0.0537223
663156	0.126432	0.00218583	0.000780673
659375	-0.377189	6.93494e-08	3.72571e-08
661895	2.07212	0.0128426	0.00407806
103315155	-0.337959	3.6605e-11	2.35961e-11
660588	-0.0678939	5.47837e-05	2.348e-05
103314147	0.00461154	0.97642	0.200243
103313243	0.488192	5.49846e-52	8.81742e-52
663379	-0.400667	5.78911e-95	1.42211e-94
655927	-0.11583	0.00175139	0.000634682
664058	0.306374	1.63938e-185	6.94305e-185
656397	0.371242	6.20553e-121	1.83241e-120
656564	-3.44416	0	0
661364	-0.068584	0.011003	0.00354495
661180	-0.375525	1.91002e-51	3.04201e-51
100141741	1.31079	0	0
662221	-0.338346	0.000105657	4.39601e-05
657798	0.0591386	0.0532322	0.0151407
658506	-0.445095	2.44154e-74	5.04577e-74
658616	0.811465	0	0
661438	0.129963	1.09525e-16	8.67248e-17
660137	-0.0565666	0.00374335	0.00129592
657011	0.974821	0.00736662	0.00243754
103313179	0.108155	5.97098e-08	3.22482e-08
654913	-0.0866708	0.000104756	4.36038e-05
659752	1.12384	0	0
100142380	0.710834	4.41597e-89	1.03346e-88
107398051	0.912252	1.0817e-05	4.92726e-06
662005	0.714225	0	0
107399182	-0.342919	0.754379	0.161598
655666	0.0379089	0.428742	0.0995331
656274	0.0709055	0.23061	0.0573608
660021	0.109621	5.11377e-15	3.82934e-15
103315118	0.593169	0.524449	0.118701
659330	1.82701	6.56045e-12	4.37647e-12
663064	-0.15787	4.33844e-08	2.36398e-08
660106	1.12528	1.32278e-33	1.60419e-33
103313391	2.53155	1.92701e-278	1.11781e-277
103313261	0.521426	0.000558478	0.000215361
656653	0.147474	3.00825e-281	1.77018e-280
655437	0.403498	0.00223285	0.000796481
100141940	-0.101434	6.75463e-05	2.86764e-05
655020	-0.100362	3.80768e-17	3.06012e-17
107398116	-0.126244	0.535719	0.120799
103313394	0.604114	1.53504e-58	2.66689e-58
659092	-0.306004	1.48439e-09	8.83351e-10
103312855	-1.96511	3.60592e-75	7.49959e-75
661402	0.131012	0.477244	0.109346
662228	-1.52833	0	0
103312710	-0.0465261	0.782958	0.166866
656154	0.233912	8.93514e-08	4.77045e-08
100141744	0.0884263	1.50359e-12	1.03086e-12
659828	-0.550198	2.27078e-21	2.08738e-21
103313198	-0.269558	4.57261e-21	4.16886e-21
658856	0.920115	0.242719	0.0600402
662193	1.07212	0.211301	0.0530484
659039	-0.650874	0.000985019	0.000369427
103313009	-0.559414	7.09403e-149	2.46321e-148
661420	-0.759759	5.15449e-30	5.83347e-30
660443	0.0153537	0.583321	0.130154
660529	0.15707	0.00454191	0.00155598
655776	0.235751	6.94219e-28	7.51778e-28
662519	-0.214051	4.93502e-58	8.52544e-58
654943	0.726234	2.10768e-11	1.37438e-11
658157	0.281427	0.0189639	0.00587177
656685	-0.154099	0.0997278	0.0268846
660376	-0.234257	0.000389506	0.000152892
656985	-0.163283	1.45711e-42	2.04642e-42
107398786	1.07212	0.531972	0.120054
107399100	-0.718069	0.0111928	0.00360066
660210	-0.142857	7.10282e-18	5.85229e-18
107398508	0.449032	3.01368e-08	1.6593e-08
661302	-0.0392625	0.0038403	0.0013275
107399218	-0.159207	0.000257422	0.000102974
658190	0.00877751	0.661091	0.144801
660981	-0.113891	0.302479	0.0730149
661700	0.68606	6.03663e-05	2.57667e-05
107398141	-0.0534125	0.900119	0.187933
657658	-0.471325	3.72117e-08	2.03465e-08
658197	0.331034	3.74401e-56	6.34919e-56
662524	0.0920035	0.0940339	0.0254787
663845	0.31333	9.6775e-185	4.07391e-184
100141709	0.139086	0.000213538	8.6194e-05
658744	-0.194542	4.66437e-23	4.48117e-23
103314125	5.98976	9.98177e-09	5.66205e-09
657466	1.32997	3.19527e-37	4.13085e-37
661947	0.0727972	1.3441e-05	6.08463e-06
663310	-0.471183	1.62171e-260	8.90094e-260
660198	-0.212426	0.000188517	7.65872e-05
103313871	-0.556135	0.000120006	4.96561e-05
100142357	-3.18419	4.68018e-67	9.02815e-67
663810	0.0721184	0.90666	0.18896
663648	1.39405	0.224282	0.0559515
664014	2.86987	0	0
100141980	0.149821	0.236406	0.0586771
659065	0.206916	3.33878e-43	4.74489e-43
657686	0.595945	0	0
664466	1.55454	2.21106e-174	8.88025e-174
661430	0.212158	3.46168e-26	3.59903e-26
663674	-0.681488	8.21168e-27	8.66073e-27
103313836	-0.411784	0.184711	0.0470533
655388	0.735855	0.0886459	0.0241485
103314411	0.487156	0.656703	0.14395
655706	0.495886	0	0
103313293	-0.641124	5.68455e-08	3.07419e-08
655817	0.0481032	0.140824	0.036869
103314674	-0.0860295	0.0958677	0.0259412
103312417	0.000513621	0.97712	0.200336
107398043	-0.512844	0.378965	0.0892383
660069	-0.0328512	0.632963	0.139571
103313220	-0.563884	1.10603e-16	8.75498e-17
663641	0.0378699	0.104059	0.0279461
103312273	-0.555913	0.154114	0.0399999
657022	0.240687	5.90423e-21	5.36193e-21
661988	-0.196799	0.000636262	0.000243534
660793	1.07129	6.0119e-89	1.4056e-88
659665	-0.368787	7.81797e-17	6.21256e-17
663897	-0.838948	5.21066e-25	5.26534e-25
663693	0.189571	0.0135687	0.00429412
656619	-0.606499	3.73003e-50	5.84559e-50
107397746	-0.899319	2.70409e-124	8.14195e-124
103315143	0.117152	0.0974398	0.026336
663294	0.410582	9.84391e-141	3.29646e-140
103313000	0.0853058	0.166623	0.0429528
655625	-0.228648	3.3333e-07	1.70758e-07
663069	-0.707642	3.30039e-11	2.13366e-11
663944	0.090805	0.00521913	0.00177002
659139	0.0750153	0.0444177	0.0128258
659881	-0.406469	0.0205495	0.00631916
103312481	-0.0327304	0.59685	0.132665
657688	-0.284337	0.0117186	0.0037518
100141643	-0.317266	2.17431e-64	4.05682e-64
655670	-0.143425	0.00857798	0.0028065
100142484	-0.238527	6.12798e-49	9.45827e-49
658186	-0.477821	1.16434e-84	2.61967e-84
656970	0.0404147	0.123248	0.0326304
661707	-0.145233	0.0011805	0.000438543
664327	0.463269	1.91889e-59	3.36965e-59
661270	-0.26246	7.07113e-17	5.63004e-17
103315087	-0.348097	0	0
663414	0.0623845	0.0488288	0.0139825
100271908	-0.968965	4.17925e-53	6.81351e-53
657860	-1.51284	0.329061	0.0787252
107398505	-0.794615	0.0619956	0.0174117
664068	-0.490076	7.32802e-108	1.98874e-107
656769	-8.47377	3.72151e-38	4.88077e-38
107397474	-0.0692137	0.086591	0.0236466
100142097	-0.523202	1.09065e-138	3.61276e-138
659899	-0.54019	3.79332e-22	3.553e-22
103312823	-0.896173	1.03751e-09	6.21954e-10
660497	-0.182726	2.15812e-17	1.74931e-17
103312760	-0.559492	2.33731e-05	1.03567e-05
654860	0.371747	1.17884e-193	5.14847e-193
660218	-0.0588964	0.000721062	0.000274233
100141645	314241	0.99989	0.204182
103313146	-0.859122	0.174736	0.0448084
103312748	2.62817	1.18812e-38	1.57297e-38
656116	-0.0655631	0.0457021	0.0131471
661681	0.00539225	0.882747	0.185024
658653	-0.185269	5.70593e-13	3.97996e-13
655929	-1.75816	3.01155e-59	5.27516e-59
657580	0.328639	5.03088e-20	4.44432e-20
655108	-0.17633	0.0148301	0.00467218
662446	-2.24981	1.04822e-11	6.93315e-12
103314920	0.0517984	0.545078	0.122722
100141865	0.604992	0.0257559	0.00776699
655977	-0.531842	9.22955e-170	3.60051e-169
663804	-0.238497	2.08307e-89	4.89835e-89
657603	-0.0303925	0.347136	0.0826397
656034	-0.0396631	0.206599	0.052044
657621	-0.0108526	0.151119	0.0392976
662844	0.257294	7.95166e-05	3.3546e-05
658459	-0.0548019	0.000809233	0.000306457
664458	-0.0125764	0.713273	0.154523
663232	-0.135331	4.01022e-09	2.3301e-09
103313875	-0.621377	3.46316e-42	4.8305e-42
657092	-0.545269	3.88718e-132	1.24386e-131
103313838	-0.54917	1.13821e-79	2.45701e-79
654925	-0.108454	0.278679	0.0679412
658497	-0.201567	2.68815e-05	1.18469e-05
103312991	0.3238	1.09034e-35	1.37509e-35
656314	0.275032	1.39739e-113	3.94317e-113
657124	-0.113394	2.04848e-06	9.93369e-07
107398388	1.58757	0.00239846	0.000852821
655847	-0.12512	7.30475e-29	8.07471e-29
103314175	-0.619225	4.12121e-08	2.24861e-08
661056	0.736601	1.00596e-08	5.70555e-09
103312682	0.13291	0.0716143	0.0198828
661763	-0.0944208	0.299635	0.072432
656937	1.74997	0	0
107398802	-0.0433589	0.896482	0.187398
662795	-0.494228	0.00642059	0.00214876
656965	-0.0114869	0.873956	0.18348
100142621	0.170199	2.21947e-24	2.20678e-24
660944	-1.64286	1.74436e-184	7.318e-184
659497	0.123799	0.0355063	0.0104511
661879	0.342462	1.99115e-19	1.71929e-19
661484	0.334924	8.97856e-48	1.35881e-47
103313536	0.424403	0.00819103	0.00268978
103314794	0.399299	7.26936e-26	7.50203e-26
655778	0.174023	1.80881e-36	2.30737e-36
107398496	-0.710386	0	0
658394	-0.21514	5.11169e-20	4.51489e-20
655434	0.00850692	0.631339	0.139263
103314221	-0.534993	7.28128e-06	3.36779e-06
663427	-0.165182	6.86773e-14	4.95408e-14
657879	-0.877681	2.27122e-49	3.51995e-49
659511	0.455447	0.0474866	0.0136252
656930	0.053475	5.04223e-12	3.38257e-12
662426	-0.189704	0.0525136	0.014951
103315117	0.594539	0.0179704	0.00558924
656363	0.00612995	0.913338	0.190085
103313504	-0.462992	0.077828	0.0214739
661912	0.132318	0.00551691	0.00186571
103314071	-0.737503	2.53188e-16	1.98299e-16
661599	0.21017	1.19584e-22	1.13594e-22
661081	-0.12417	5.48569e-05	2.35073e-05
664456	-0.298088	1.80987e-10	1.12719e-10
657167	0.820546	8.32512e-49	1.2797e-48
103313791	0.28467	0.00025397	0.000101676
103312654	-0.491149	1.0249e-07	5.44636e-08
657160	0.0438062	0.0127462	0.00404929
661860	-0.0905634	1.88111e-12	1.28554e-12
659309	-0.0282402	8.10446e-20	7.10569e-20
657724	-0.163292	7.11644e-06	3.29434e-06
660196	-0.239553	2.75085e-23	2.66056e-23
658581	-0.0571822	8.49546e-05	3.57385e-05
656854	0.115523	9.54162e-10	5.73322e-10
658455	-0.857524	7.31238e-181	3.01095e-180
107398667	0.657081	0.614176	0.135967
100142039	-0.543964	6.8247e-10	4.13267e-10
654965	0.0315221	0.645102	0.141915
103313245	-0.185773	0.110416	0.029501
664589	-0.0277034	0.875911	0.183773
662843	-0.311593	1.80801e-48	2.76877e-48
659699	-0.296093	9.6858e-66	1.8387e-65
663709	-0.193815	3.88386e-06	1.83842e-06
656616	0.264266	2.35697e-44	3.40595e-44
661820	-1.26948	3.45748e-29	3.84274e-29
657478	-0.0182224	0.288847	0.0701012
659261	-0.176223	1.06116e-05	4.83595e-06
654881	-0.497308	2.57466e-26	2.68652e-26
103313172	-0.249123	2.9064e-09	1.70064e-09
657958	0.0570509	0.100597	0.0270712
103313798	0.0254942	0.526513	0.119065
661975	-1.35672	6.10357e-43	8.62897e-43
100142283	0.83111	0.0938482	0.0254369
657147	0.0469398	0.00121461	0.000450632
662432	0.802639	0	0
103313935	-0.266351	9.36471e-18	7.68491e-18
100141552	-0.909776	1.28408e-21	1.18863e-21
103313428	0.0529673	0.580938	0.12967
659747	-0.651072	2.46394e-182	1.02056e-181
103314927	0.0537732	0.536265	0.120895
655828	-0.158223	1.18408e-11	7.81695e-12
107398486	-0.416344	7.4245e-06	3.43111e-06
107398949	-2.97719	9.49555e-06	4.34637e-06
659889	-0.157933	0.0368869	0.0108133
662295	-0.100349	1.69497e-07	8.86952e-08
661579	0.4418	7.56788e-72	1.52662e-71
660051	0.0508013	0.370223	0.0874911
654856	-0.325671	4.34718e-09	2.52259e-09
107397458	-0.0654406	0.306111	0.0738189
103312975	-0.596458	7.85125e-27	8.28595e-27
661872	-0.15232	2.83153e-11	1.83588e-11
658962	-0.116743	0.0792351	0.0218217
660815	-0.48794	3.81215e-40	5.1657e-40
103313580	-0.00588415	0.982859	0.201353
103313514	-1.19581	4.86636e-13	3.40502e-13
103314004	0.0751503	0.58574	0.130646
107398264	-0.0969219	0.00661467	0.00220647
661592	-0.0140793	0.723512	0.156336
103314458	0.308244	2.48097e-14	1.81588e-14
663268	-0.673543	5.65053e-163	2.13622e-162
103313549	-0.190916	0.624302	0.137878
103314436	-0.440332	0.0517433	0.014748
103312242	0.155603	0.235482	0.0584687
663336	0.432435	1.97459e-29	2.20664e-29
659954	-0.145113	1.88913e-45	2.77411e-45
659861	-0.0861506	0.396621	0.092949
663613	0.0340218	0.00931305	0.00303039
658008	0.173137	0.0013127	0.000484745
662934	-0.11115	1.25505e-12	8.63352e-13
661067	-1.53945	1.46812e-44	2.12717e-44
658588	-1.07084	3.61478e-10	2.21855e-10
107399136	0.342717	1.04914e-23	1.02626e-23
657297	-0.0241069	0.488707	0.111623
103314676	-0.211551	0.00166726	0.000606617
655420	1.17115	0	0
100141799	0.0405842	0.13559	0.0356208
107398842	-5.24981	4.73096e-06	2.22106e-06
661043	-1.84465	0	0
100142452	-0.166941	0.0326926	0.00968989
659902	-0.152404	3.01599e-10	1.85914e-10
659410	-0.437597	1.35198e-11	8.89305e-12
661195	-0.491741	1.40018e-15	1.06927e-15
100142051	0.0293397	0.660757	0.144741
103314073	-0.19163	0.004415	0.00151462
107399213	-0.741288	6.59319e-71	1.31645e-70
103312205	-0.897715	1.04951e-19	9.16556e-20
103313591	0.026455	0.684855	0.149298
657429	-0.202184	5.85322e-05	2.501e-05
657649	0.29598	1.07929e-88	2.51501e-88
657387	-1.75125	1.48817e-35	1.87201e-35
663551	0.406685	2.0582e-21	1.89446e-21
659849	0.123273	8.88323e-18	7.29591e-18
659146	-0.418403	4.25905e-55	7.12146e-55
103314270	0.840198	2.49219e-32	2.95576e-32
655675	0.0690824	3.0232e-06	1.44542e-06
655809	0.893845	6.0638e-168	2.35055e-167
107398453	-0.424218	2.24313e-08	1.24498e-08
641606	-0.471548	2.87645e-12	1.94862e-12
100142032	-0.285207	2.31667e-10	1.43679e-10
107398614	-0.208665	0.328072	0.0785501
100141753	0.101155	0.0480169	0.0137629
103312139	-3.2269	4.66852e-146	1.59947e-145
100141867	-0.0618645	0.184176	0.0469291
662130	0.0698233	0.0100372	0.00325197
660753	-0.139301	1.06997e-12	7.3791e-13
662298	-0.255299	2.9248e-29	3.25736e-29
659335	-0.263002	5.61416e-48	8.55197e-48
659113	-0.148481	0.00715243	0.00237388
659977	0.075092	0.047024	0.0135028
107398895	-0.670793	0.000333593	0.000131913
100142425	-3.38354	2.23602e-65	4.23325e-65
100142350	-1.32351	4.93119e-22	4.60205e-22
103314733	0.914234	1.32941e-134	4.29895e-134
660577	0.513693	2.2025e-11	1.43373e-11
103312986	-0.112556	0.034055	0.010068
663305	0.145647	0.0114087	0.00366241
662144	-0.24981	0.604504	0.13415
661109	-0.374828	5.78973e-26	5.98767e-26
100142030	-0.0884132	0.00197275	0.000708604
662064	0.134667	6.0665e-05	2.58806e-05
100301567	0.0328983	0.217287	0.0544005
657719	0.206599	9.11324e-14	6.55073e-14
658995	-0.136344	0.00190657	0.00068638
103312138	-0.707714	1.15462e-14	8.54938e-15
103314725	-0.22949	6.70999e-37	8.6246e-37
663223	0.270095	5.19994e-18	4.30253e-18
103314149	0.36585	0.137312	0.0360055
103315251	2.14778	4.90272e-34	6.00374e-34
103312236	0.204969	0.533371	0.120342
659688	0.329569	8.03403e-15	5.97771e-15
656542	0.460044	1.70394e-07	8.91454e-08
661963	-0.853114	2.66285e-17	2.15202e-17
663286	-0.03423	0.444644	0.102733
100190999	0.144656	0.000624976	0.000239514
100142160	0.543976	1.52629e-36	1.949e-36
103313709	-0.689722	0.0642652	0.0180037
655267	-0.0537779	0.397285	0.0930955
660250	-0.227791	3.9439e-25	3.99932e-25
103315220	-0.0232166	0.555885	0.124812
661720	-0.385633	2.21684e-14	1.62694e-14
662270	0.0277386	0.449863	0.103797
103313498	0.170661	1.16955e-07	6.19356e-08
660531	-0.810584	2.09228e-40	2.84462e-40
658468	-0.0462936	0.0993343	0.0267845
656549	2.02688	0	0
661909	-0.530861	1.36124e-65	2.5811e-65
103314448	-0.338346	0.0251877	0.00760548
657044	0.453312	3.93457e-26	4.08635e-26
657618	-0.105956	0.00137095	0.000504433
660595	-0.142702	0.0110105	0.00354714
663871	-0.560539	0	0
657115	0.318865	0.0234278	0.00711866
103315239	-0.171986	0.239311	0.059311
657050	0.147901	0.0284129	0.00851264
103312891	0.437642	1.6393e-17	1.33473e-17
107397931	-0.0400647	0.699705	0.152042
656504	0.0594502	0.262144	0.0643994
662396	-0.0884734	0.0590568	0.0166561
657370	1.20007	1.97235e-29	2.20464e-29
660260	-0.292724	8.84188e-30	9.95595e-30
656948	-0.194807	4.36921e-13	3.06286e-13
656095	0.0894656	0.230197	0.0572667
660176	0.153523	8.29318e-07	4.13043e-07
664355	-0.210025	0.0156271	0.00490592
661422	-0.25732	1.20049e-07	6.35192e-08
659775	0.382067	1.45497e-62	2.67091e-62
658283	0.652077	0	0
103314579	-0.0420311	0.857742	0.180509
103314252	0.00500417	0.990926	0.202751
655055	-0.291513	7.49277e-07	3.74321e-07
663525	-0.114496	4.24731e-06	2.00059e-06
661211	-0.0673724	0.180176	0.0460634
664138	0.489444	2.21322e-15	1.67864e-15
663274	-1.43978	1.8808e-06	9.13684e-07
655260	0.0241708	0.207377	0.0522133
[truncated: 21,977 more rows]
